# Supplementary material
Source: PubMed Central journal article supplement (PMC5453840)
Supplement: NIHMS859573-supplement-SI2.pdf [file NIHMS859573-supplement-SI2.pdf]

# Supporting Information

## Enantioselective Synthesis of $\beta$ -Fluoro Amines via $\beta$ -Amino $\alpha$ -Fluoro Nitroalkanes and a Traceless Activating Group Strategy

Brandon A. Vara and Jeffrey N. Johnston\*

Department of Chemistry and Vanderbilt Institute of Chemical Biology, Vanderbilt University, Nashville, Tennessee 37235

SI-II-X

|                                                                                 |    |
|---------------------------------------------------------------------------------|----|
| Figure 1. $^1\text{H}$ NMR (400 MHz, $\text{CDCl}_3$ ) of 2.....                | 3  |
| Figure 2. $^{13}\text{C}$ NMR/DEPT135 (100 MHz, $\text{CDCl}_3$ ) of 2 .....    | 4  |
| Figure 3. $^1\text{H}$ NMR (600 MHz, $\text{CDCl}_3$ ) of 3.....                | 5  |
| Figure 4. $^{13}\text{C}$ NMR/DEPT135 (150MHz, $\text{CDCl}_3$ ) of 3 .....     | 6  |
| Figure 5. $^1\text{H}$ NMR (400 MHz, $\text{CDCl}_3$ ) of 7a.....               | 7  |
| Figure 6. $^{13}\text{C}$ NMR/DEPT135 (100 MHz, $\text{CDCl}_3$ ) of 7a.....    | 8  |
| Figure 7. $^1\text{H}$ NMR (400 MHz, $\text{CDCl}_3$ ) of 7b.....               | 9  |
| Figure 8. $^{13}\text{C}$ NMR/DEPT135 (100 MHz, $\text{CDCl}_3$ ) of 7b .....   | 10 |
| Figure 9. $^1\text{H}$ NMR (400 MHz, $\text{CDCl}_3$ ) of 7c.....               | 11 |
| Figure 10. $^{13}\text{C}$ NMR/DEPT135 (100 MHz, $\text{CDCl}_3$ ) of 7c.....   | 12 |
| Figure 11. $^1\text{H}$ NMR (400 MHz, $\text{CDCl}_3$ ) of 7d.....              | 13 |
| Figure 12. $^{13}\text{C}$ NMR/DEPT135 (100 MHz, $\text{CDCl}_3$ ) of 7d .....  | 14 |
| Figure 13. $^1\text{H}$ NMR (400 MHz, $\text{CDCl}_3$ ) of 7e.....              | 15 |
| Figure 14. $^{13}\text{C}$ NMR/DEPT135 (100 MHz, $\text{CDCl}_3$ ) of 7e.....   | 16 |
| Figure 15. $^1\text{H}$ NMR (400 MHz, $\text{CDCl}_3$ ) of 7f .....             | 17 |
| Figure 16. $^{13}\text{C}$ NMR/DEPT135 (100 MHz, $\text{CDCl}_3$ ) of 7f .....  | 18 |
| Figure 17. $^1\text{H}$ NMR (400 MHz, $\text{CDCl}_3$ ) of 7g.....              | 19 |
| Figure 18. $^{13}\text{C}$ NMR/DEPT135 (100 MHz, $\text{CDCl}_3$ ) of 7g .....  | 20 |
| Figure 19. $^1\text{H}$ NMR (600 MHz, $\text{CDCl}_3$ ) of 7h.....              | 21 |
| Figure 20. $^{13}\text{C}$ NMR/DEPT135 (150 MHz, $\text{CDCl}_3$ ) of 7h .....  | 22 |
| Figure 21. $^1\text{H}$ NMR (600 MHz, $\text{CDCl}_3$ ) of 7i.....              | 23 |
| Figure 22. $^{13}\text{C}$ NMR/DEPT135 (150 MHz, $\text{CDCl}_3$ ) of 7i .....  | 24 |
| Figure 23. $^1\text{H}$ NMR (600 MHz, $\text{CDCl}_3$ ) of 7j.....              | 24 |
| Figure 24. $^{13}\text{C}$ NMR/DEPT135 (150 MHz, $\text{CDCl}_3$ ) of 7j .....  | 26 |
| Figure 25. $^1\text{H}$ NMR (600 MHz, MeOD) of <i>cis</i> -8 .....              | 27 |
| Figure 26. $^{13}\text{C}$ NMR/DEPT135 (150 MHz, MeOD) of <i>cis</i> -8 .....   | 28 |
| Figure 27. $^1\text{H}$ NMR (400 MHz, MeOD) of <i>trans</i> -8.....             | 29 |
| Figure 28. $^{13}\text{C}$ NMR/DEPT135 (100 MHz, MeOD) of <i>trans</i> -8 ..... | 30 |
| Figure 29. $^1\text{H}$ NMR (400 MHz, $\text{CDCl}_3$ ) of 9.....               | 31 |
| Figure 30. $^{13}\text{C}$ NMR/DEPT135 (100 MHz, $\text{CDCl}_3$ ) of 9 .....   | 32 |
| Figure 31. $^1\text{H}$ NMR (400 MHz, $\text{CDCl}_3$ ) of 10.....              | 33 |
| Figure 32. $^{13}\text{C}$ NMR/DEPT135 (100 MHz, $\text{CDCl}_3$ ) of 10 .....  | 34 |
| Figure 33. $^1\text{H}$ NMR (400 MHz, $\text{CDCl}_3$ ) of 11.....              | 35 |
| Figure 34. $^{13}\text{C}$ NMR/DEPT135 (100 MHz, $\text{CDCl}_3$ ) of 11 .....  | 36 |
| Figure 35. $^1\text{H}$ NMR (600 MHz, $\text{CDCl}_3$ ) of S1 .....             | 37 |
| Figure 36. $^{13}\text{C}$ NMR/DEPT135 (150 MHz, $\text{CDCl}_3$ ) of S1 .....  | 38 |

|                                                                                |    |
|--------------------------------------------------------------------------------|----|
| Figure 37. $^1\text{H}$ NMR (400 MHz, $\text{CDCl}_3$ ) of S2 .....            | 39 |
| Figure 38. $^{13}\text{C}$ NMR/DEPT135 (100 MHz, $\text{CDCl}_3$ ) of S2 ..... | 40 |
| Figure 39. $^1\text{H}$ NMR (400 MHz, $\text{CDCl}_3$ ) of S3 .....            | 41 |
| Figure 40. $^{13}\text{C}$ NMR/DEPT135 (100 MHz, $\text{CDCl}_3$ ) of S3 ..... | 42 |
| Figure 41. $^1\text{H}$ NMR (400 MHz, MeOD) of S4 .....                        | 43 |
| Figure 42. $^{13}\text{C}$ NMR/DEPT135 (100 MHz, MeOD) of S4.....              | 44 |
| Figure 43. HPLC trace of 3.....                                                | 45 |
| Figure 44. HPLC trace of 7a.....                                               | 46 |
| Figure 45. HPLC trace of 7b.....                                               | 47 |
| Figure 46. HPLC trace of 7c.....                                               | 48 |
| Figure 47. HPLC trace of 7d.....                                               | 49 |
| Figure 48. HPLC trace of 7e.....                                               | 50 |
| Figure 49. HPLC trace of 7f + <i>ent</i> -7f. ....                             | 51 |
| Figure 50. HPLC trace of 7g.....                                               | 52 |
| Figure 51. HPLC trace of 7h.....                                               | 53 |
| Figure 52. HPLC trace of 7i. ....                                              | 54 |
| Figure 53. HPLC trace of 7j. ....                                              | 55 |
| Figure 54. HPLC trace of 10.....                                               | 56 |

**Figure 1.**  $^1\text{H}$  NMR (400 MHz,  $\text{CDCl}_3$ ) of **2**

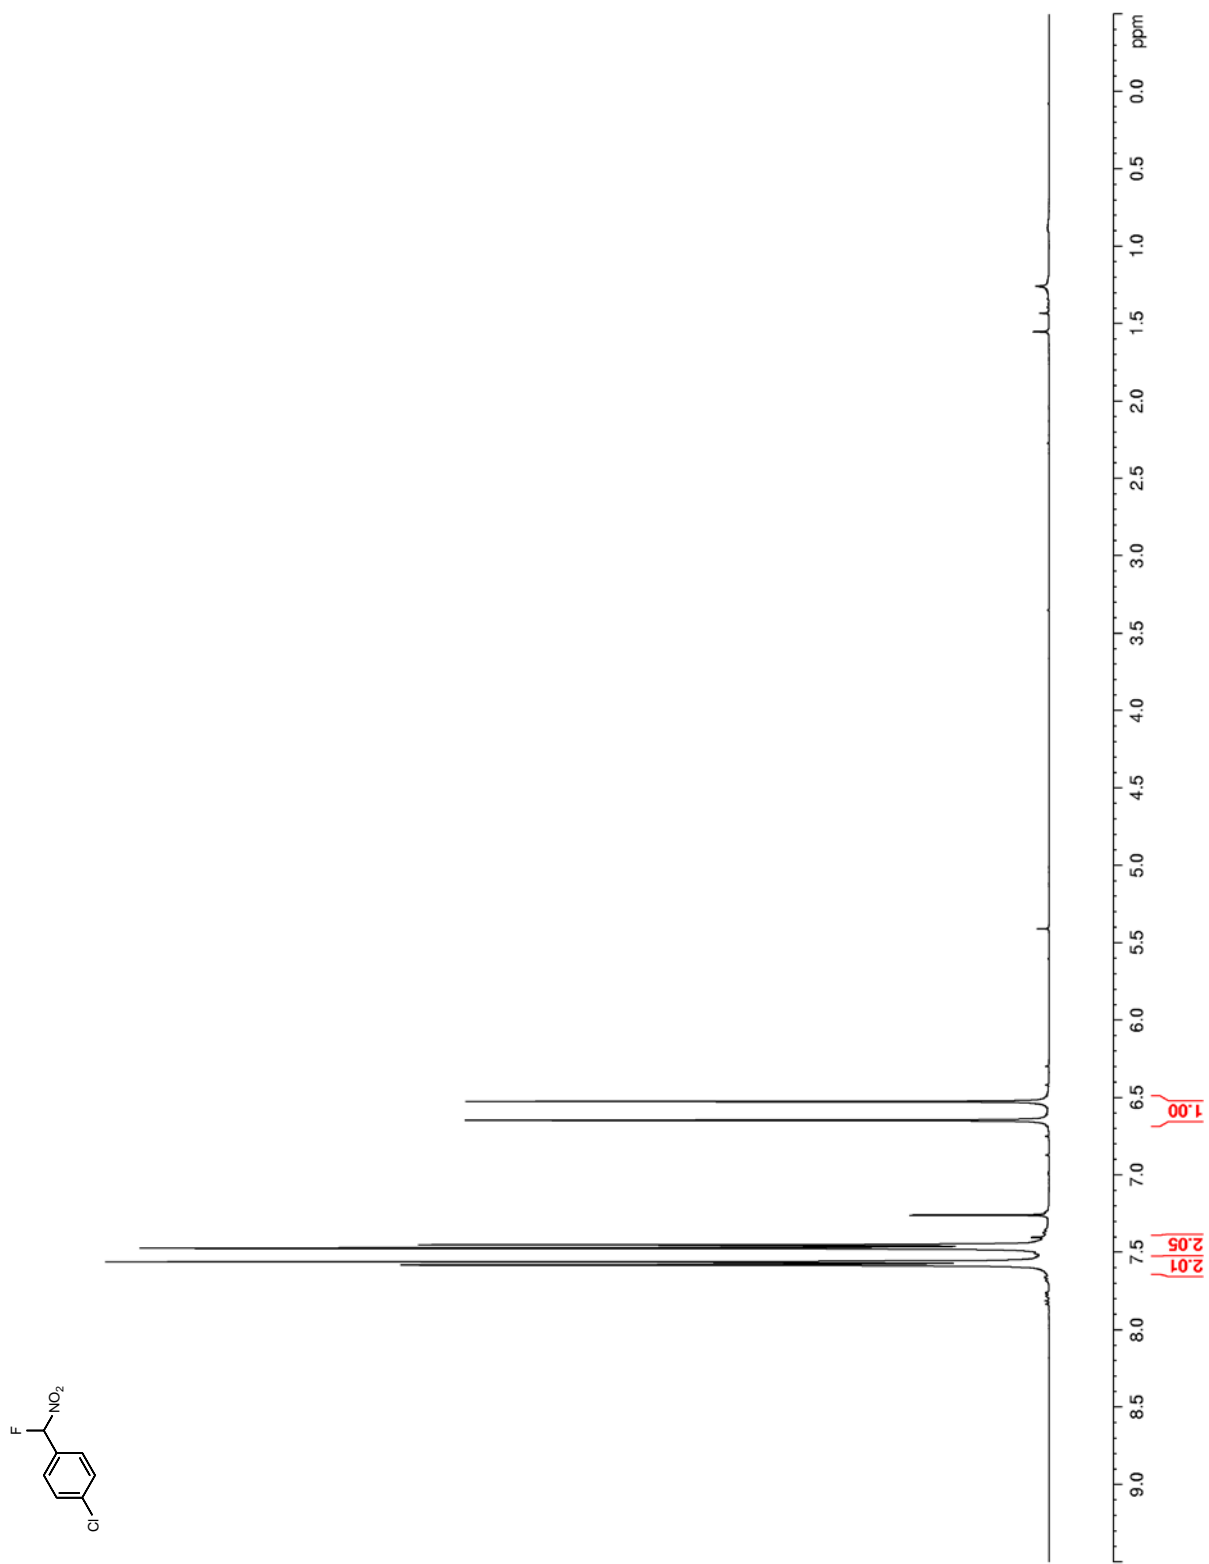

**Figure 2.**  $^{13}\text{C}$  NMR/DEPT135 (100 MHz,  $\text{CDCl}_3$ ) of **2**

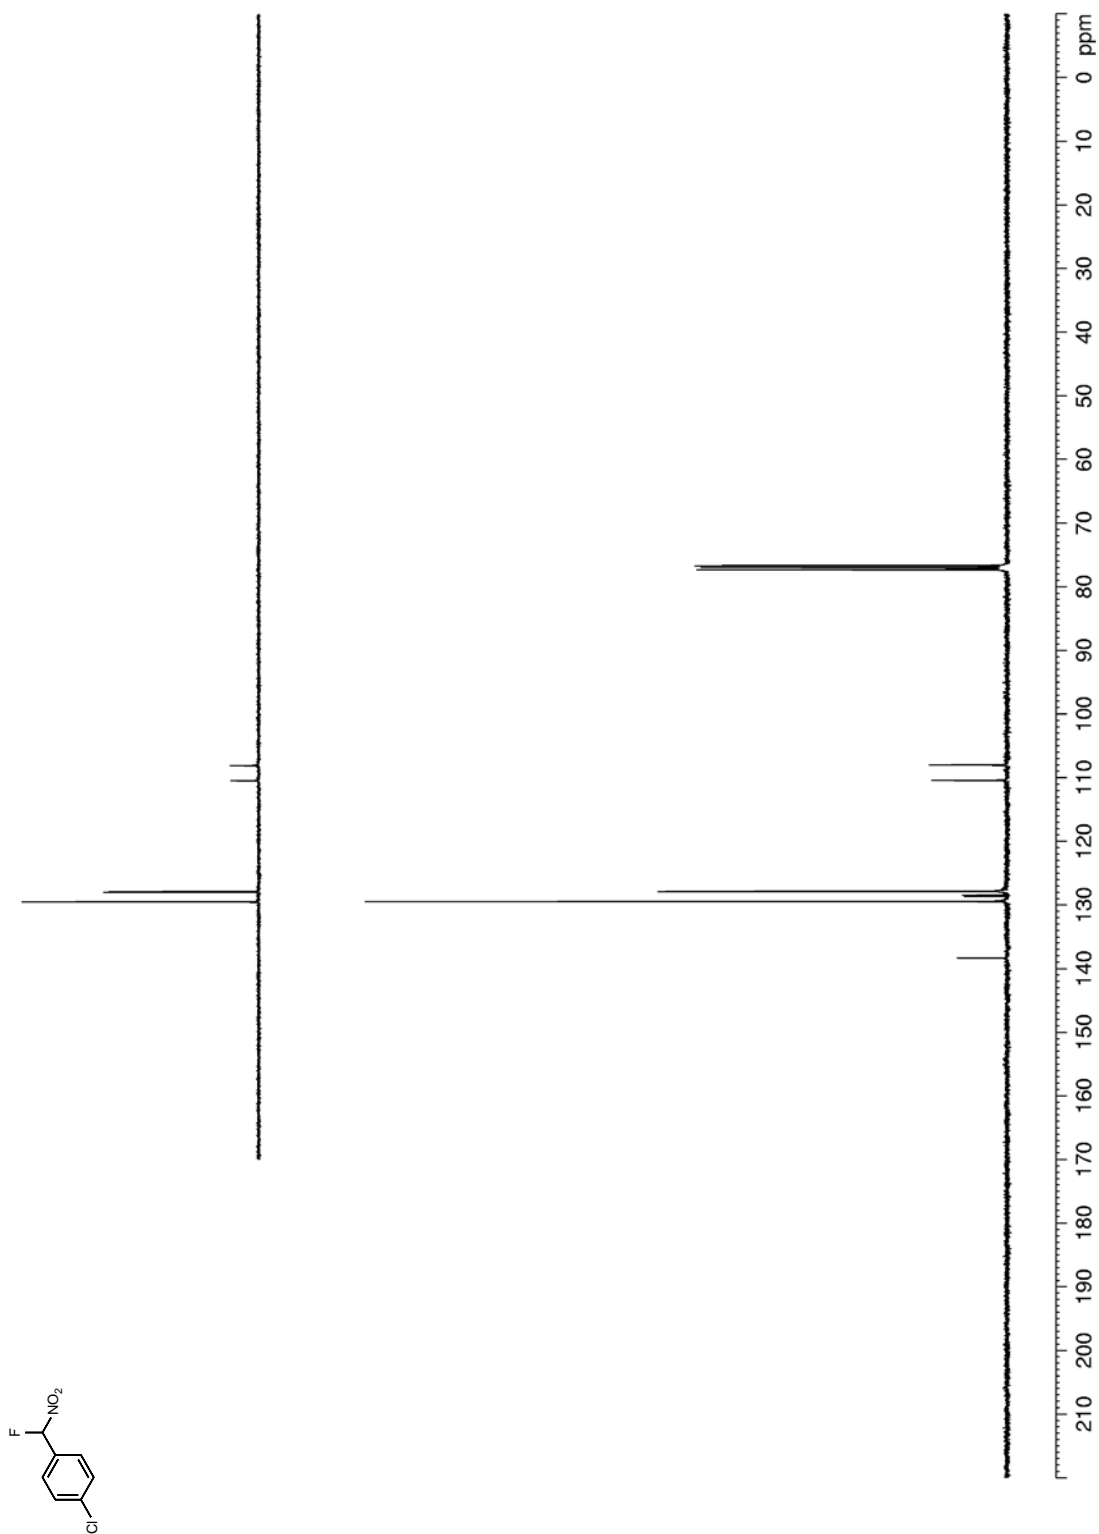

**Figure 3.**  $^1\text{H}$  NMR (600 MHz,  $\text{CDCl}_3$ ) of **3**

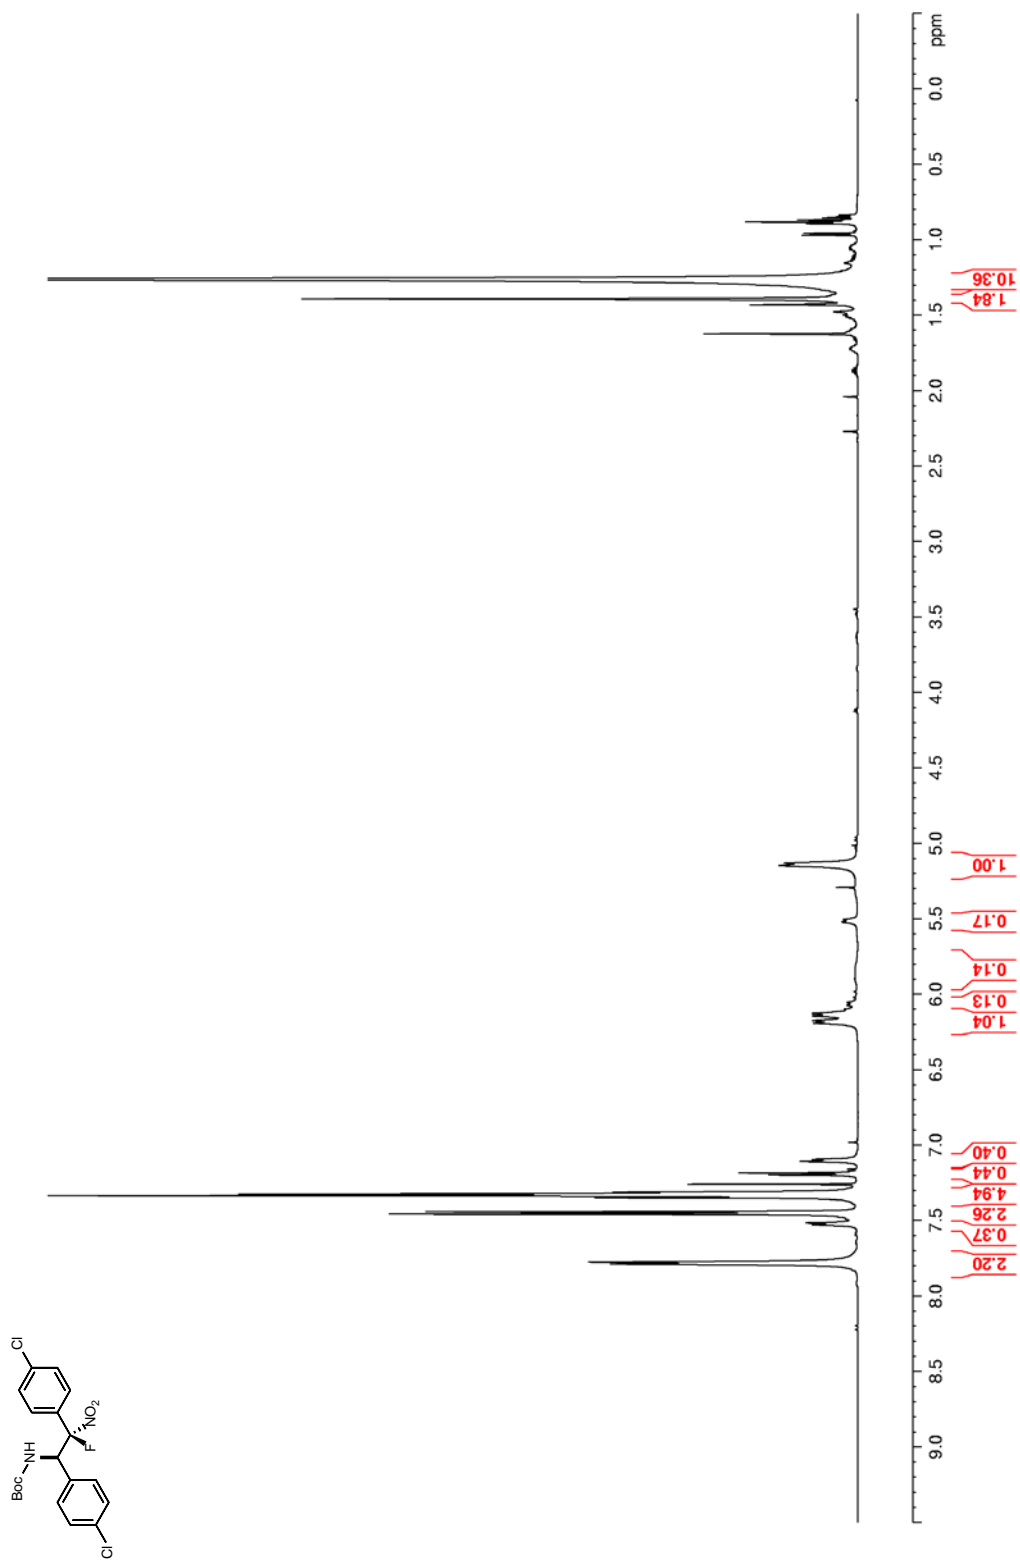

**Figure 4.**  $^{13}\text{C}$  NMR/DEPT135 (150MHz,  $\text{CDCl}_3$ ) of **3**

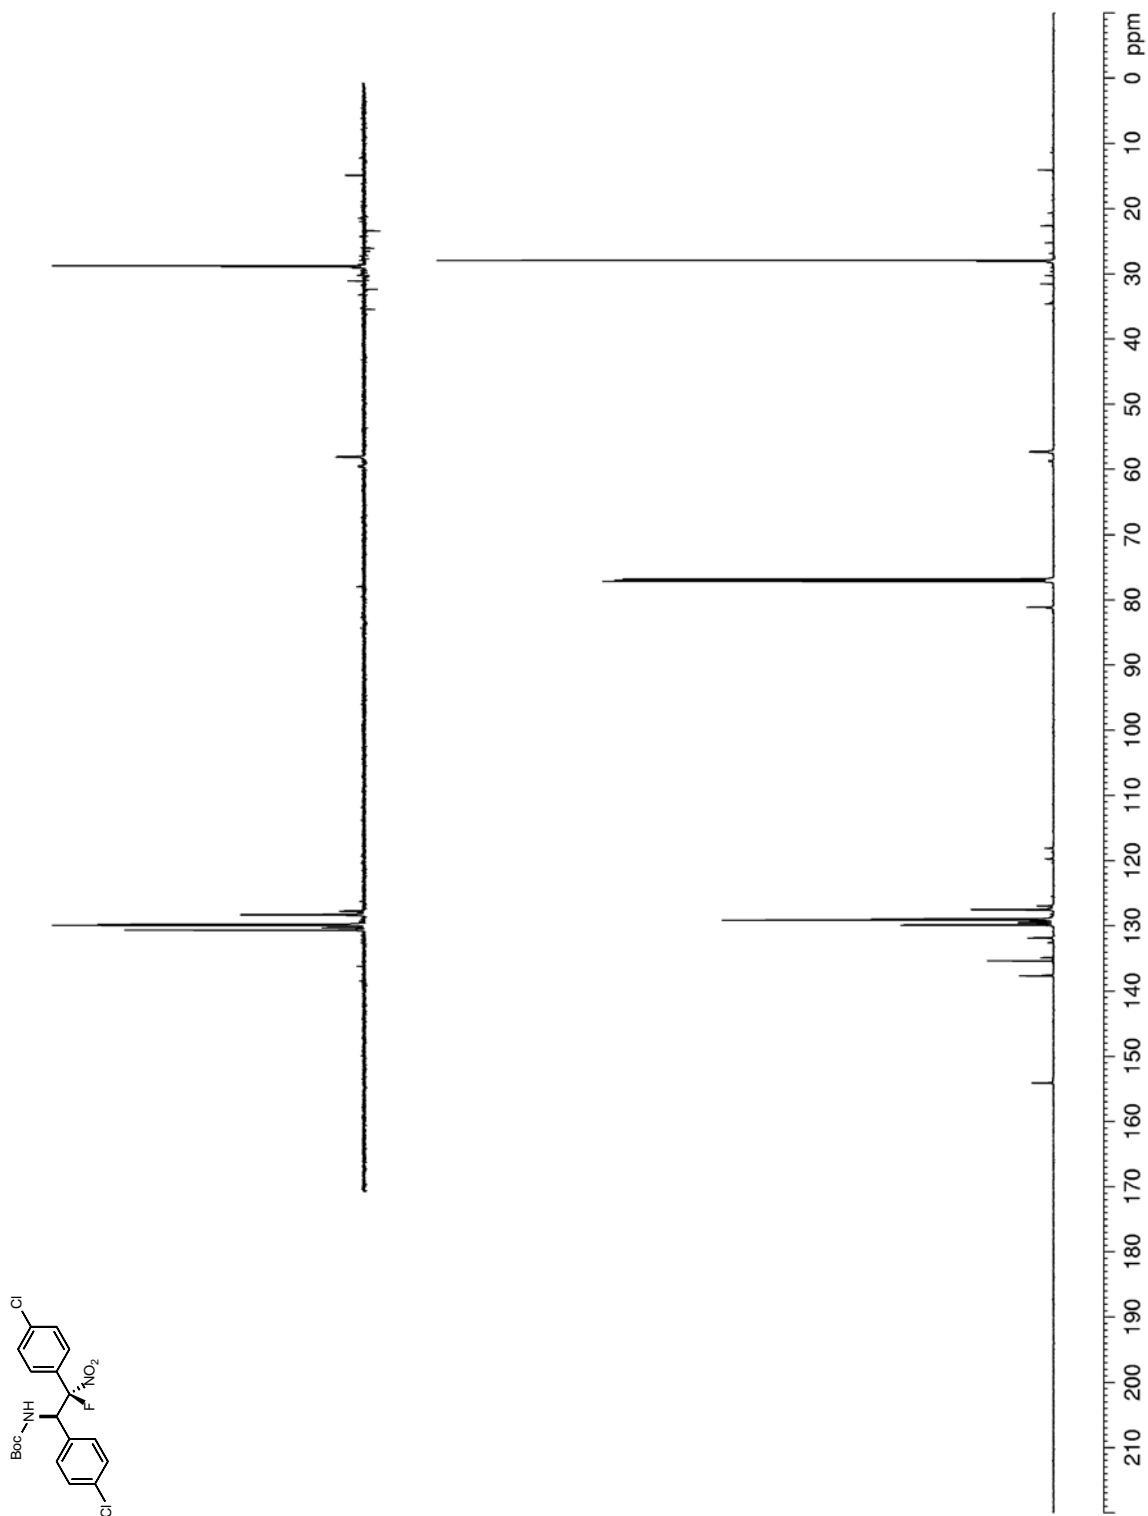

**Figure 5.**  $^1\text{H}$  NMR (400 MHz,  $\text{CDCl}_3$ ) of **7a**

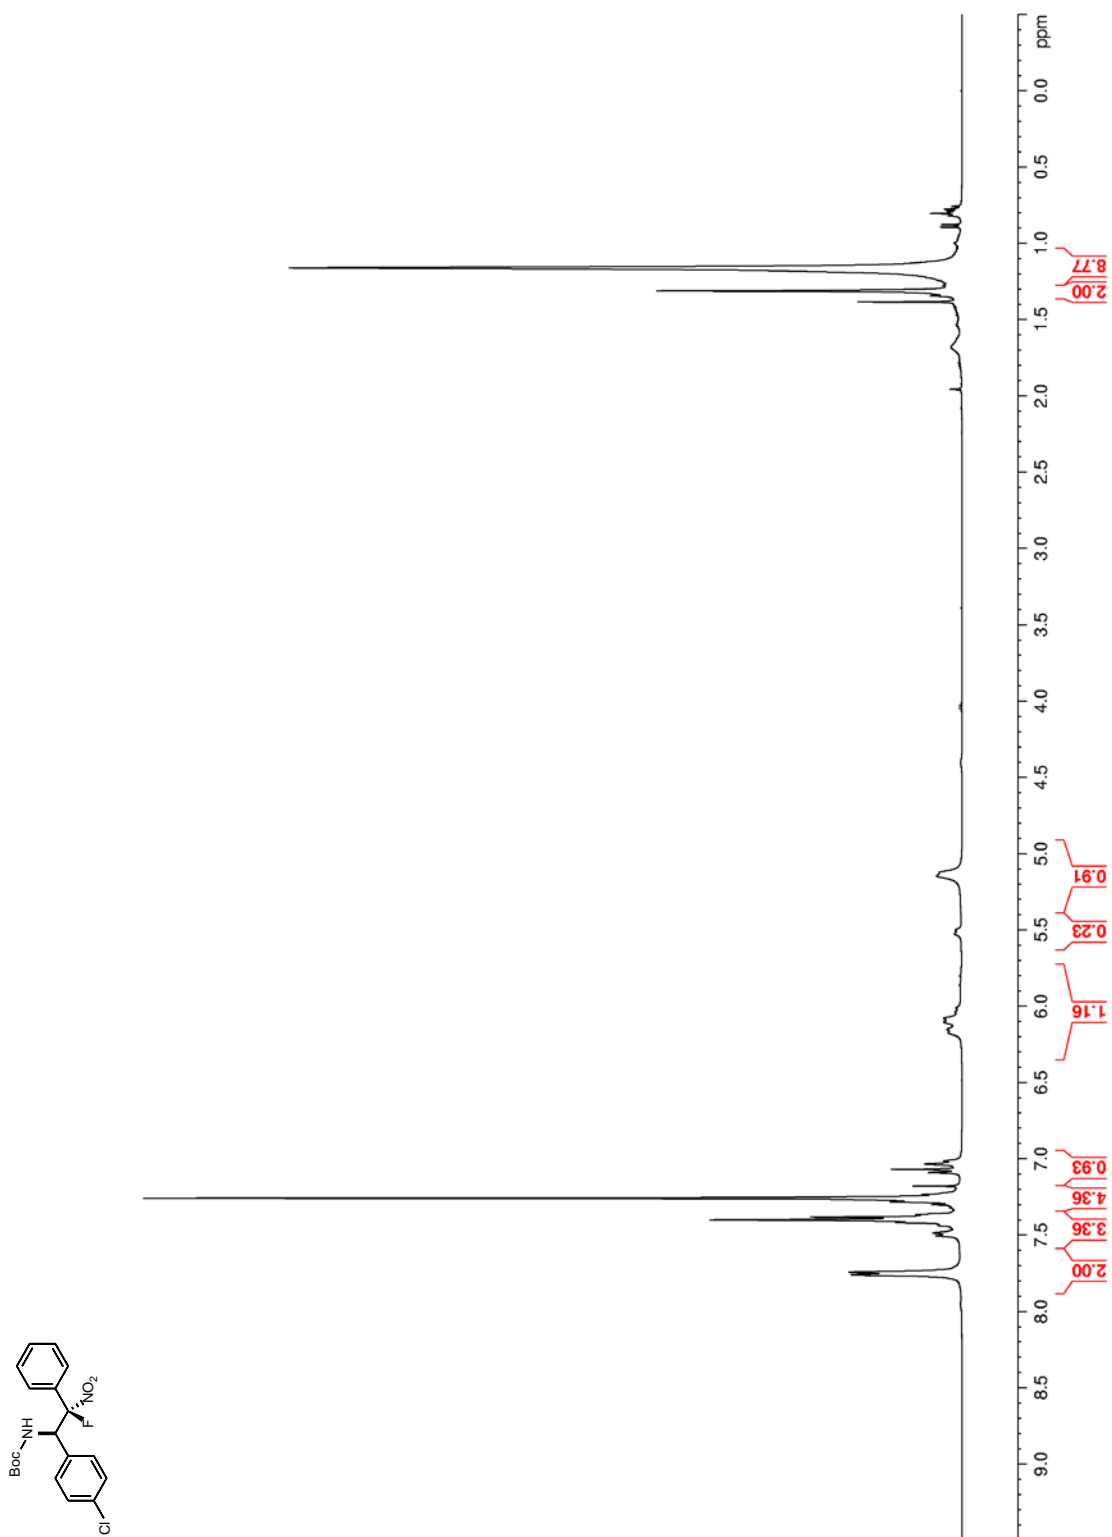

**Figure 6.**  $^{13}\text{C}$  NMR/DEPT135 (100 MHz,  $\text{CDCl}_3$ ) of **7a**

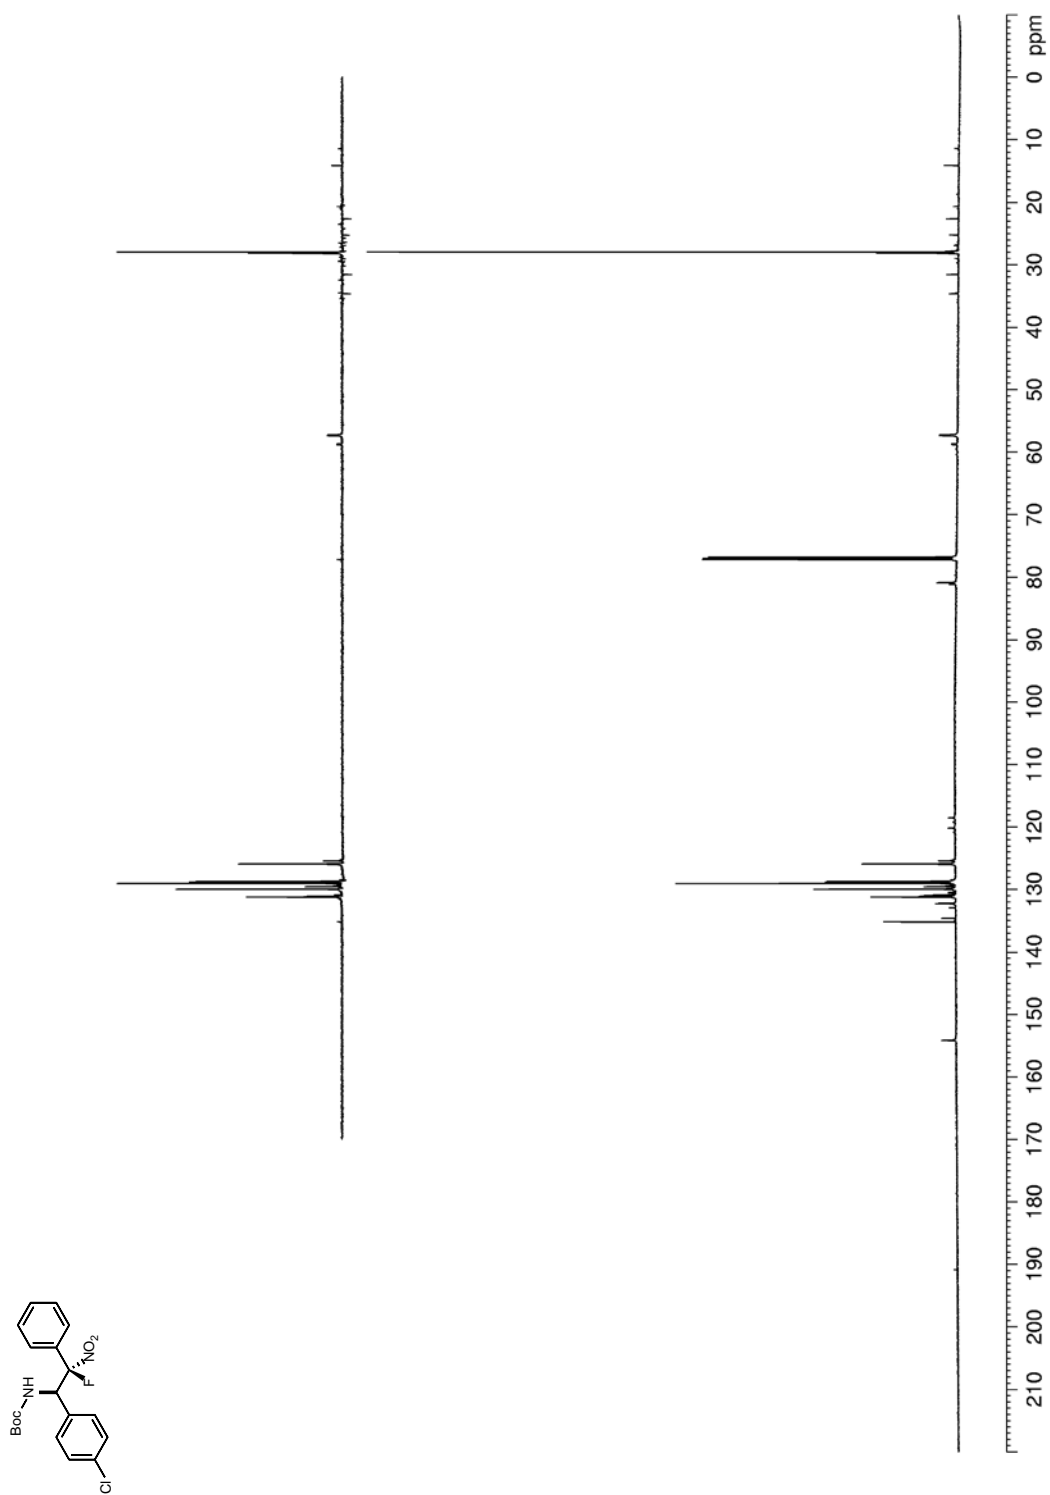



**Figure 7.**  $^1\text{H}$  NMR (400 MHz,  $\text{CDCl}_3$ ) of **7b**

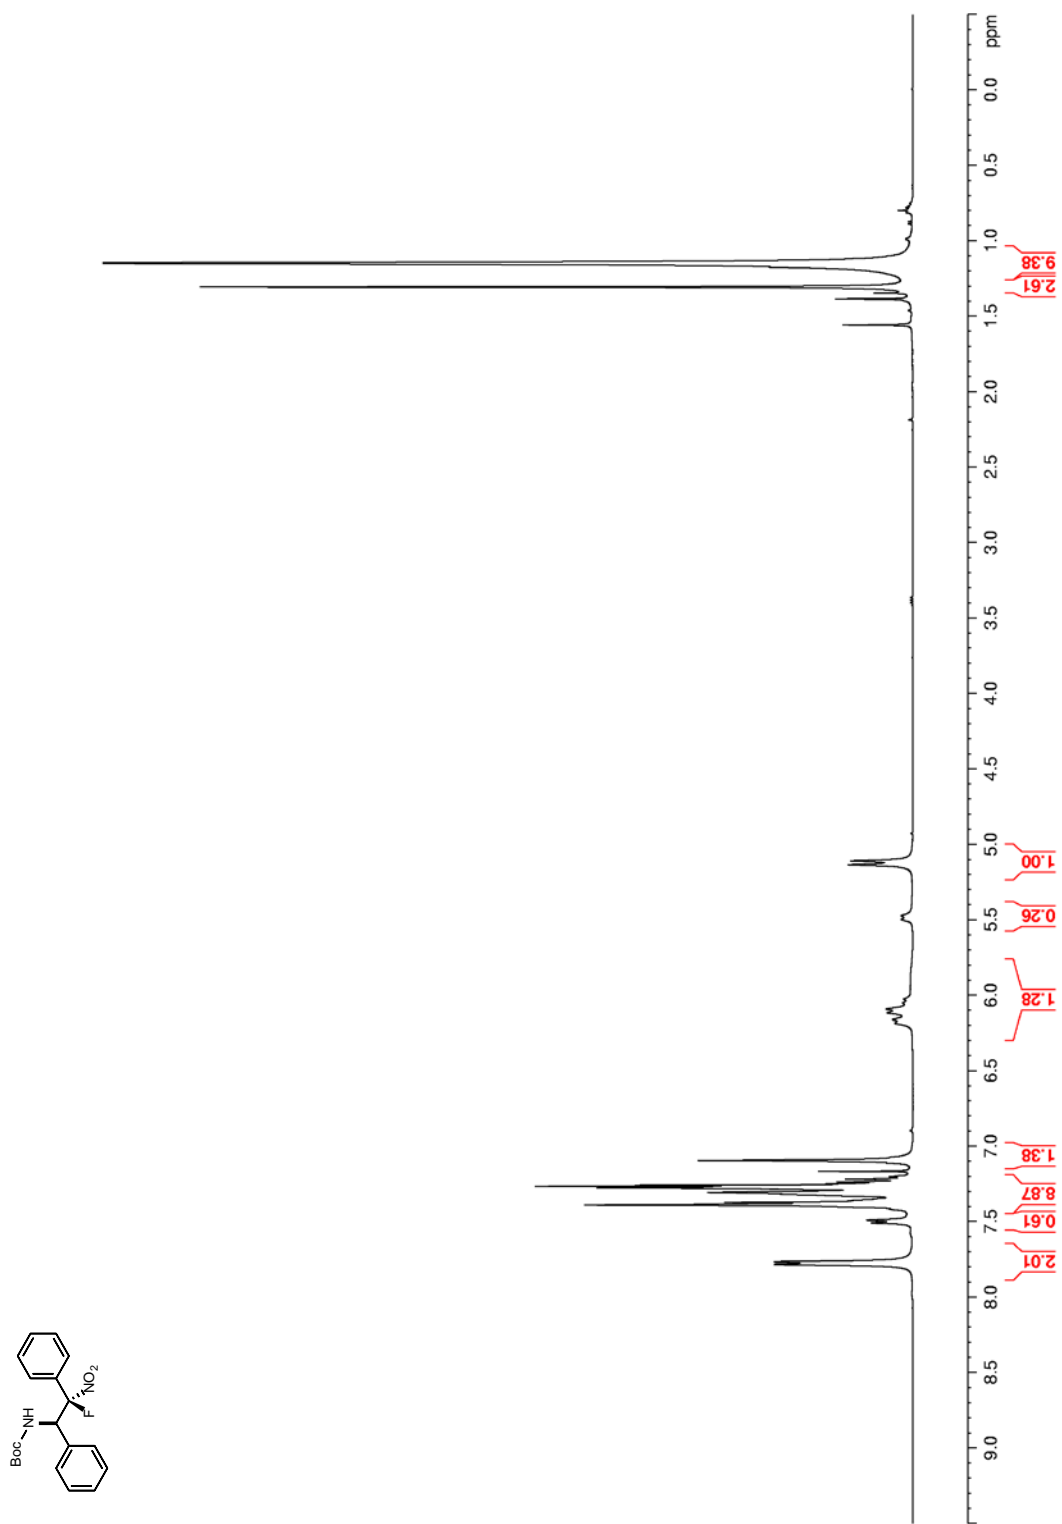

**Figure 8.**  $^{13}\text{C}$  NMR/DEPT135 (100 MHz,  $\text{CDCl}_3$ ) of **7b**

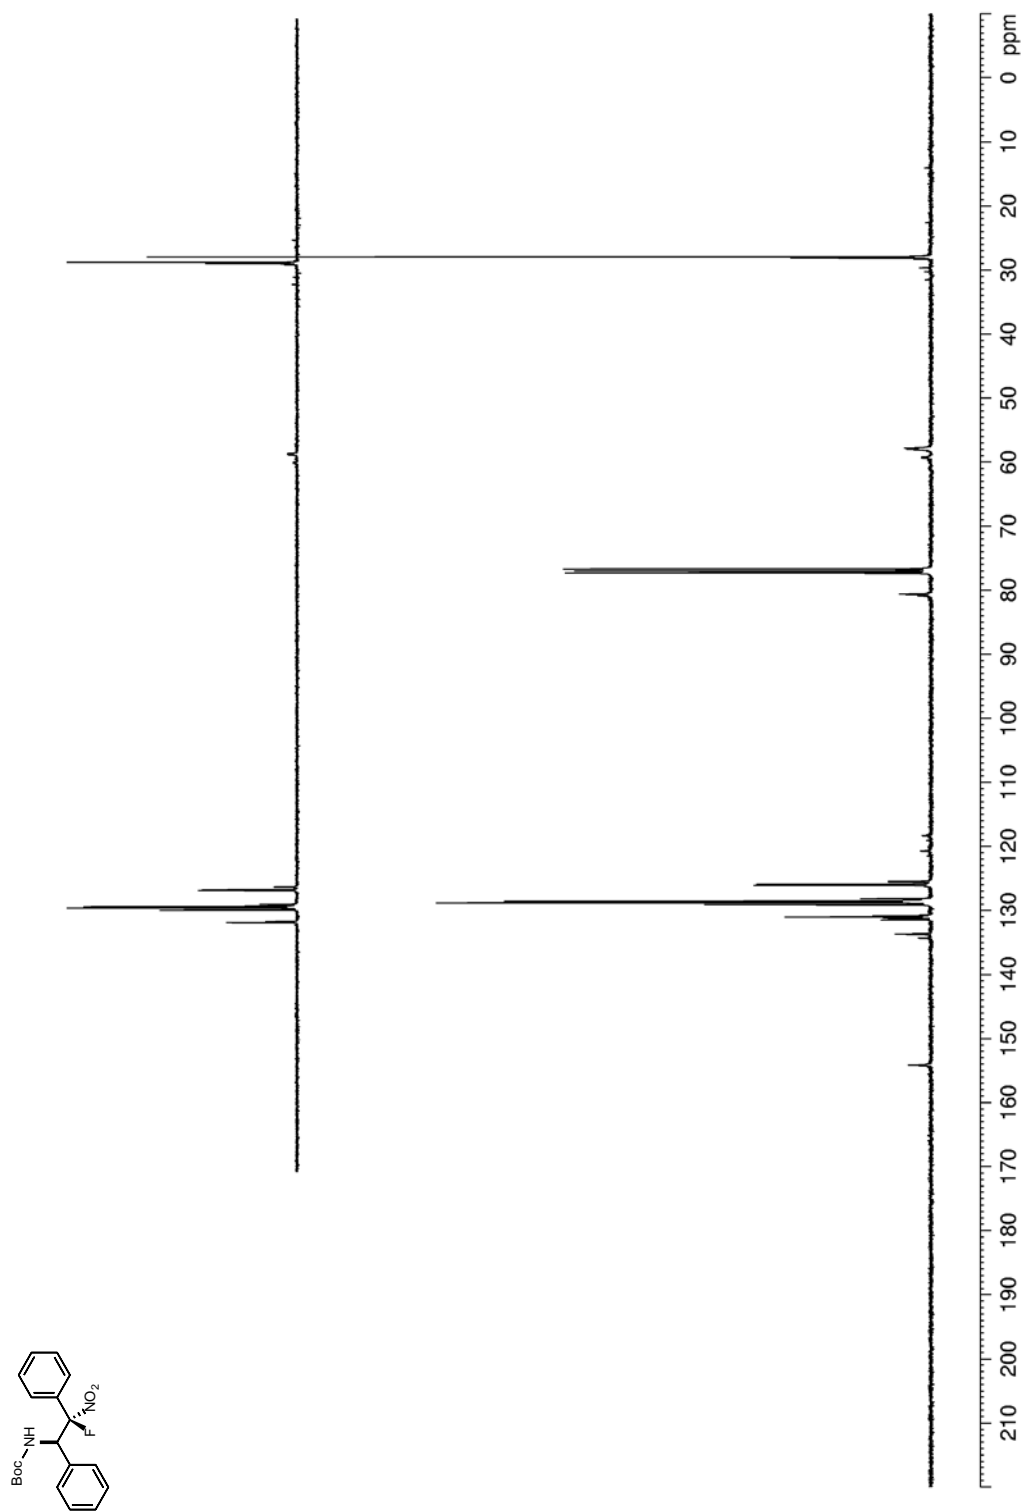

**Figure 9.**  $^1\text{H}$  NMR (400 MHz,  $\text{CDCl}_3$ ) of **7c**

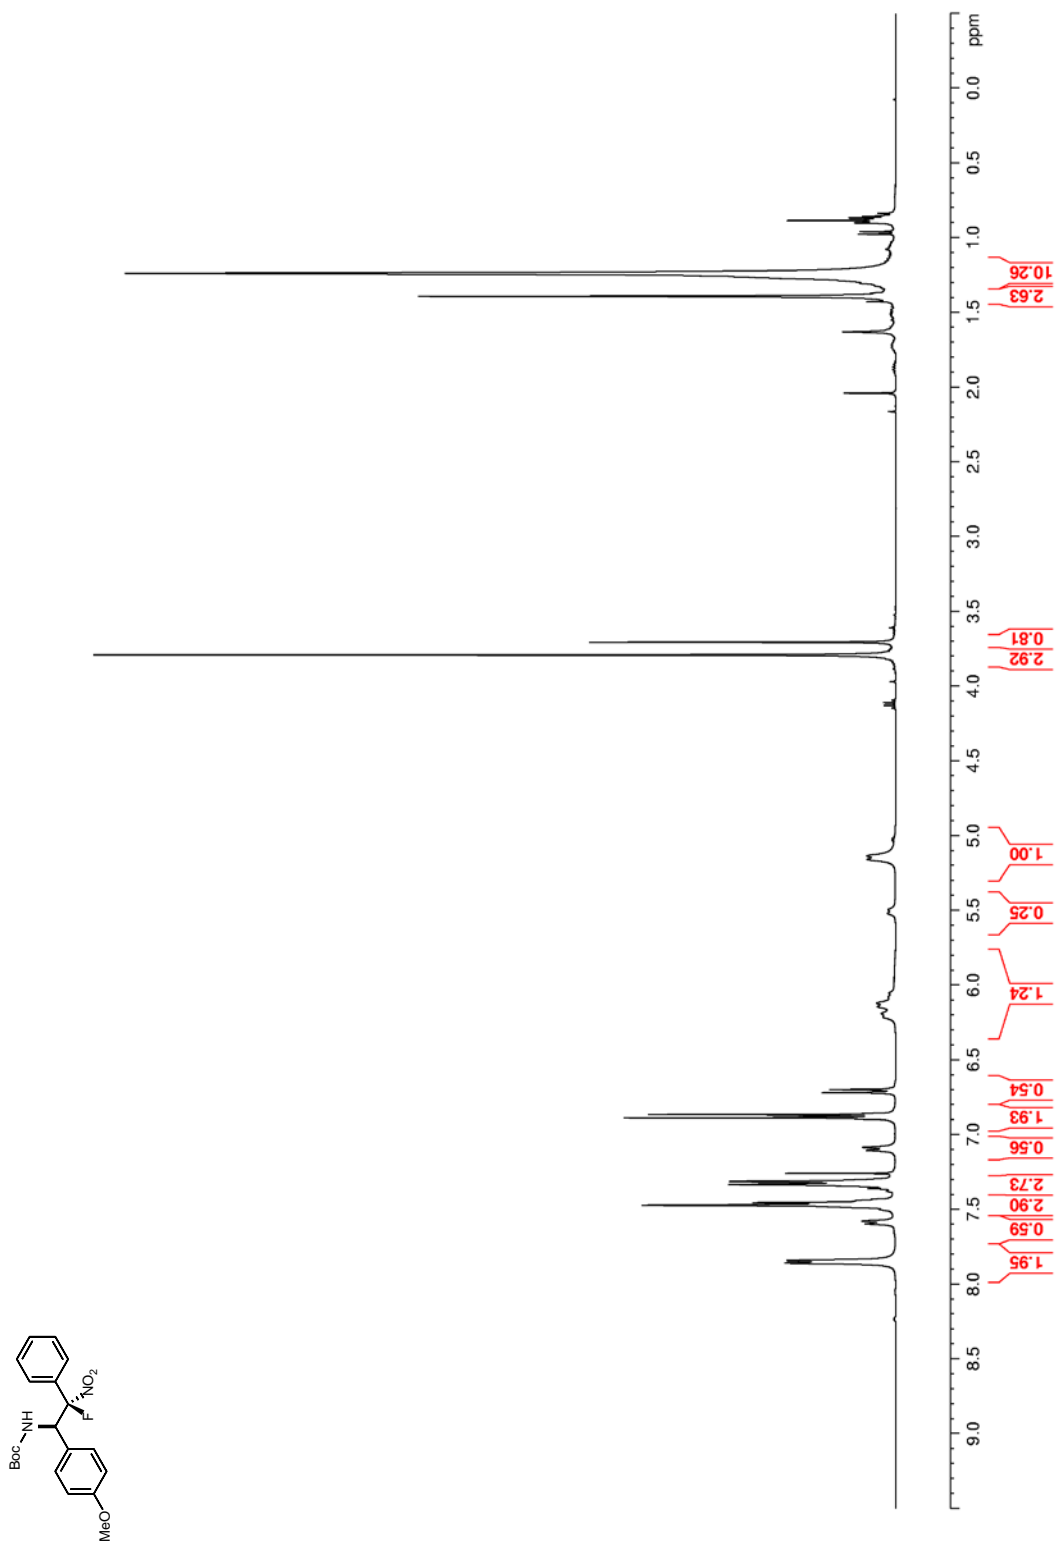

**Figure 10.**  $^{13}\text{C}$  NMR/DEPT135 (100 MHz,  $\text{CDCl}_3$ ) of **7c**

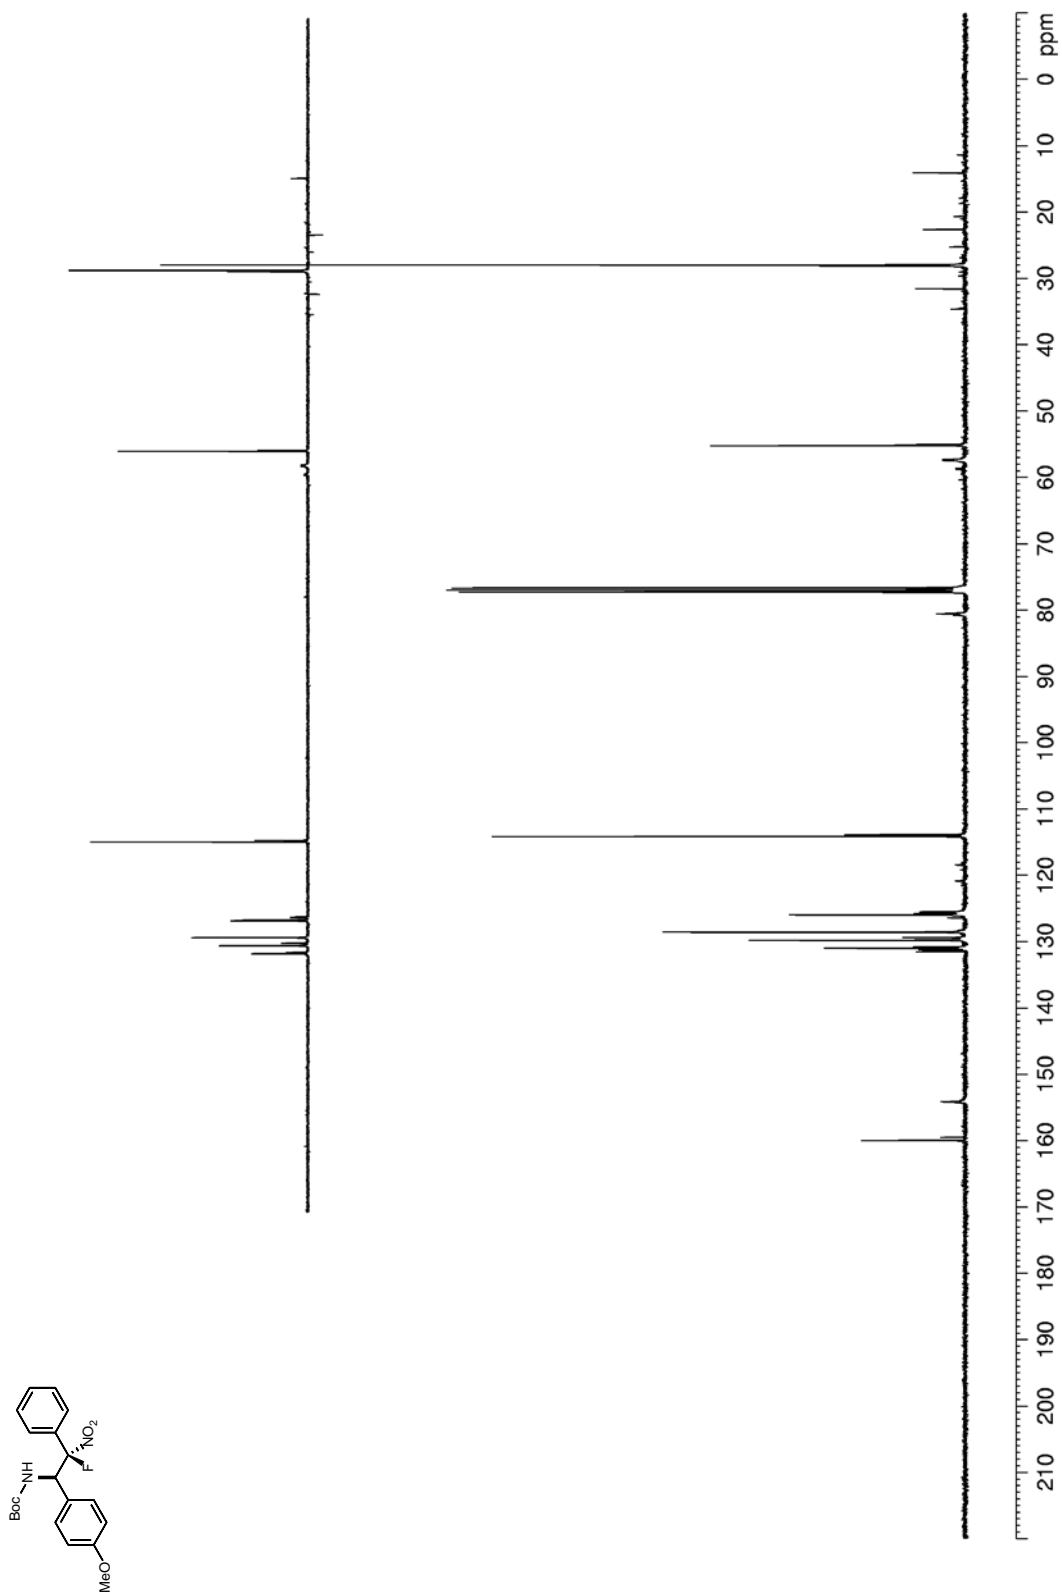

**Figure 11.**  $^1\text{H}$  NMR (400 MHz,  $\text{CDCl}_3$ ) of **7d**

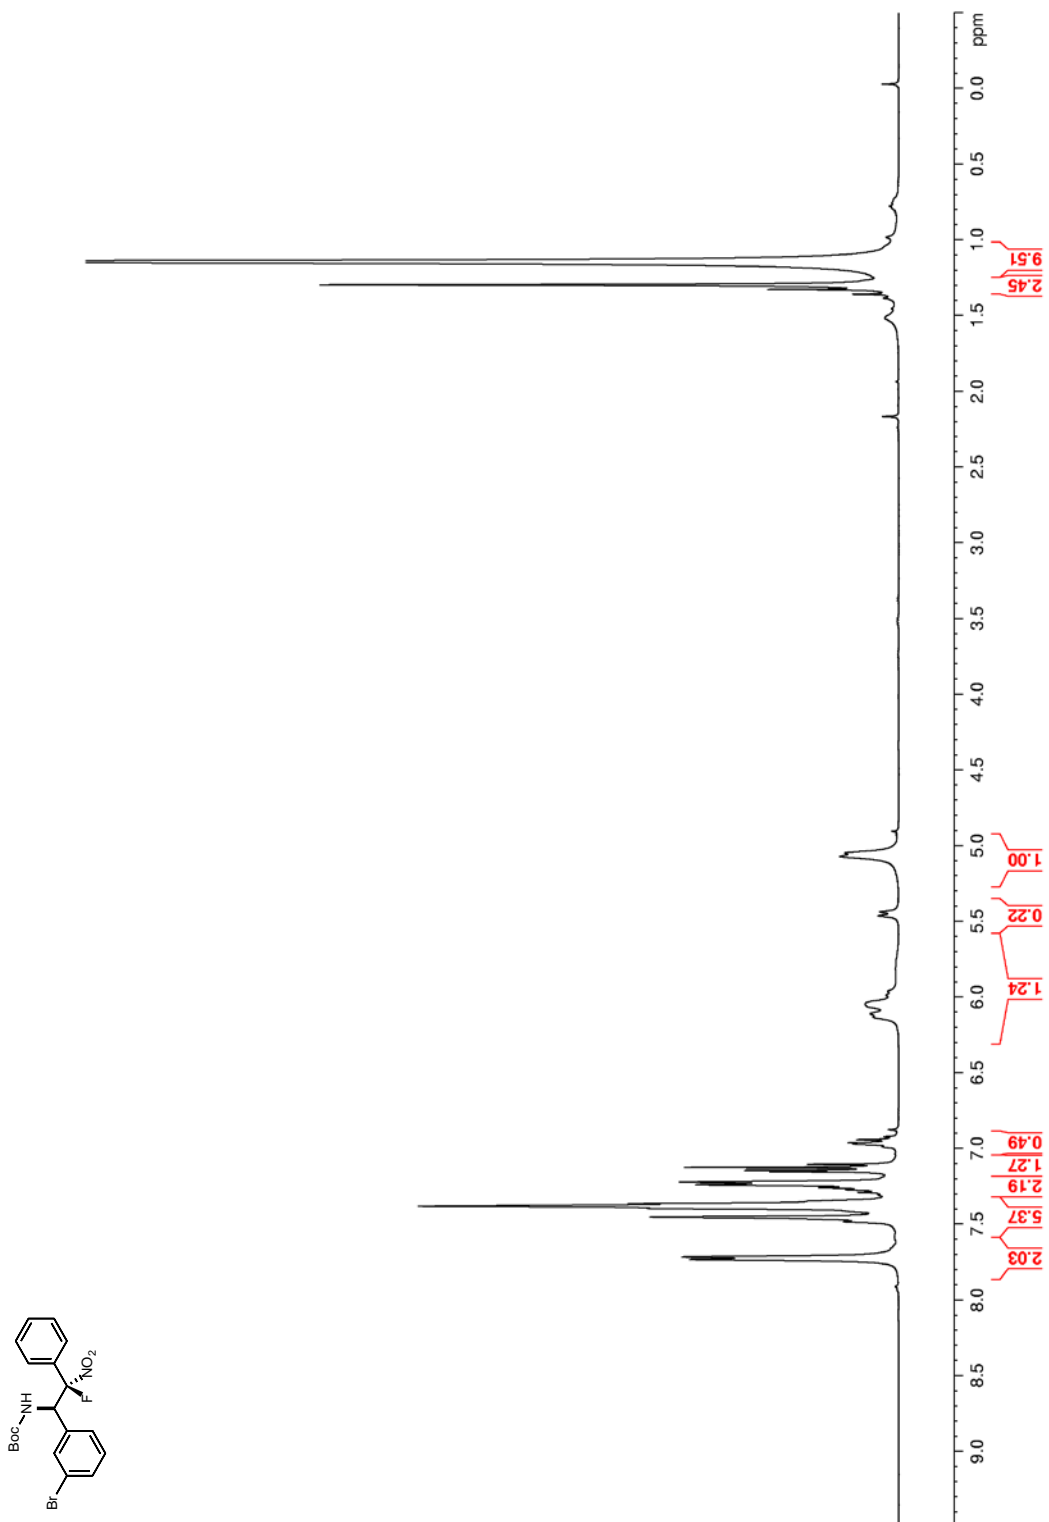

**Figure 12.**  $^{13}\text{C}$  NMR/DEPT135 (100 MHz,  $\text{CDCl}_3$ ) of **7d**

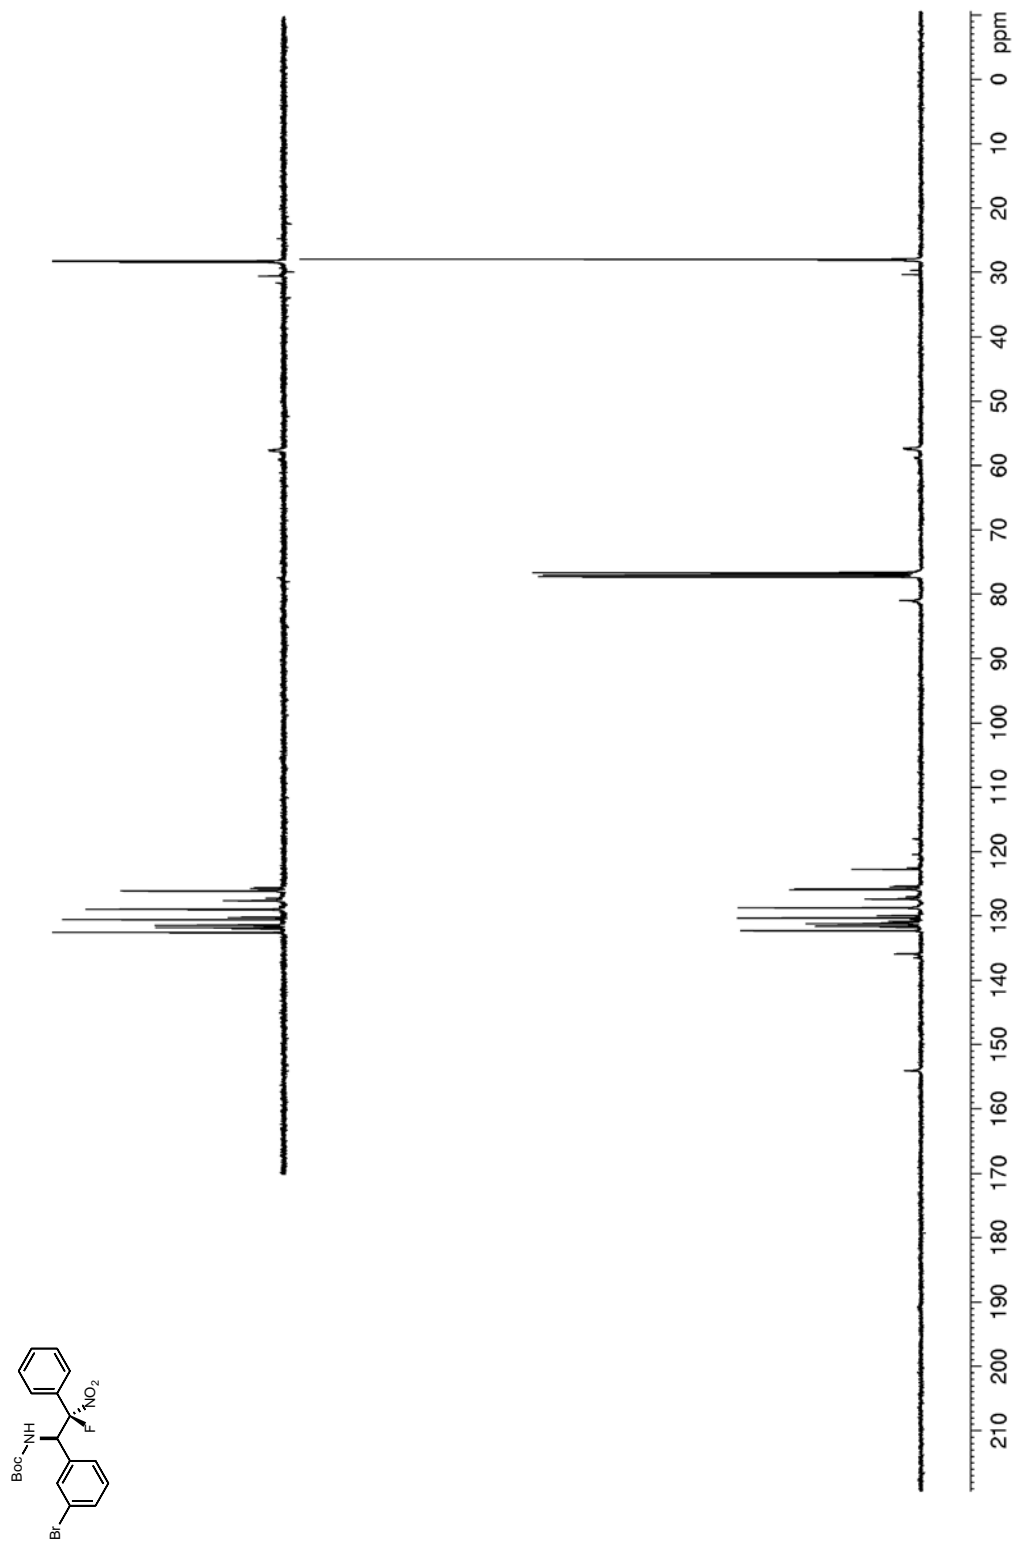

**Figure 13.**  $^1\text{H}$  NMR (400 MHz,  $\text{CDCl}_3$ ) of **7e**

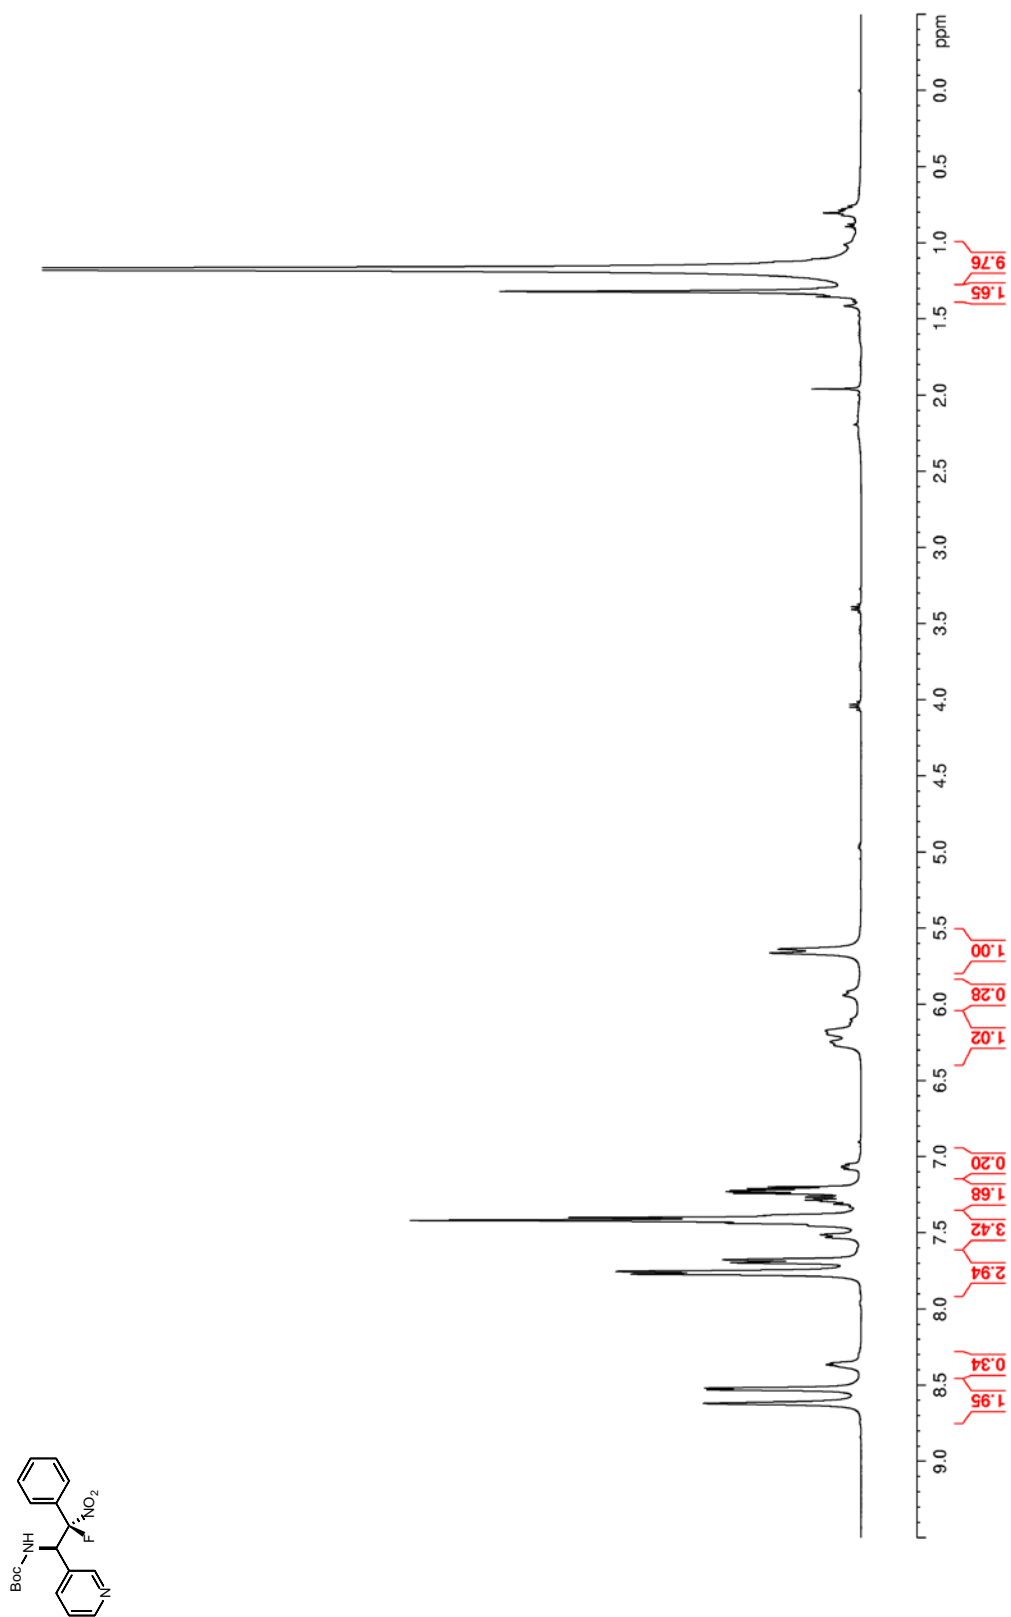

**Figure 14.**  $^{13}\text{C}$  NMR/DEPT135 (100 MHz,  $\text{CDCl}_3$ ) of **7e**

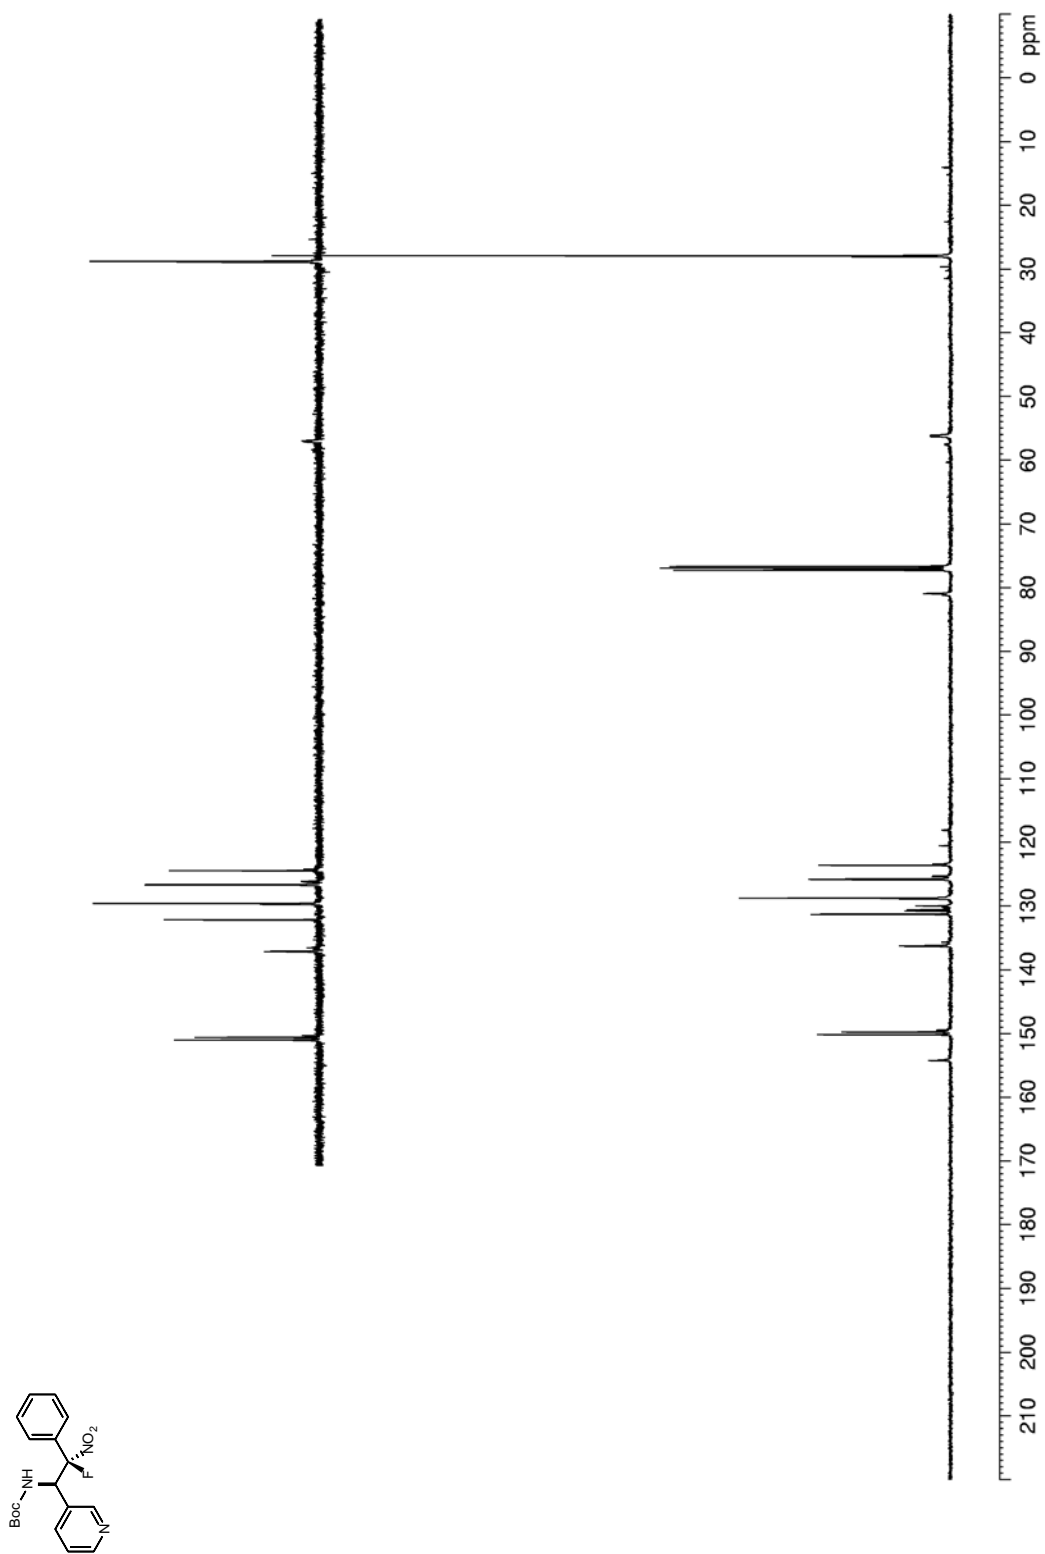



Figure 15.  $^1\text{H}$  NMR (400 MHz,  $\text{CDCl}_3$ ) of 7f

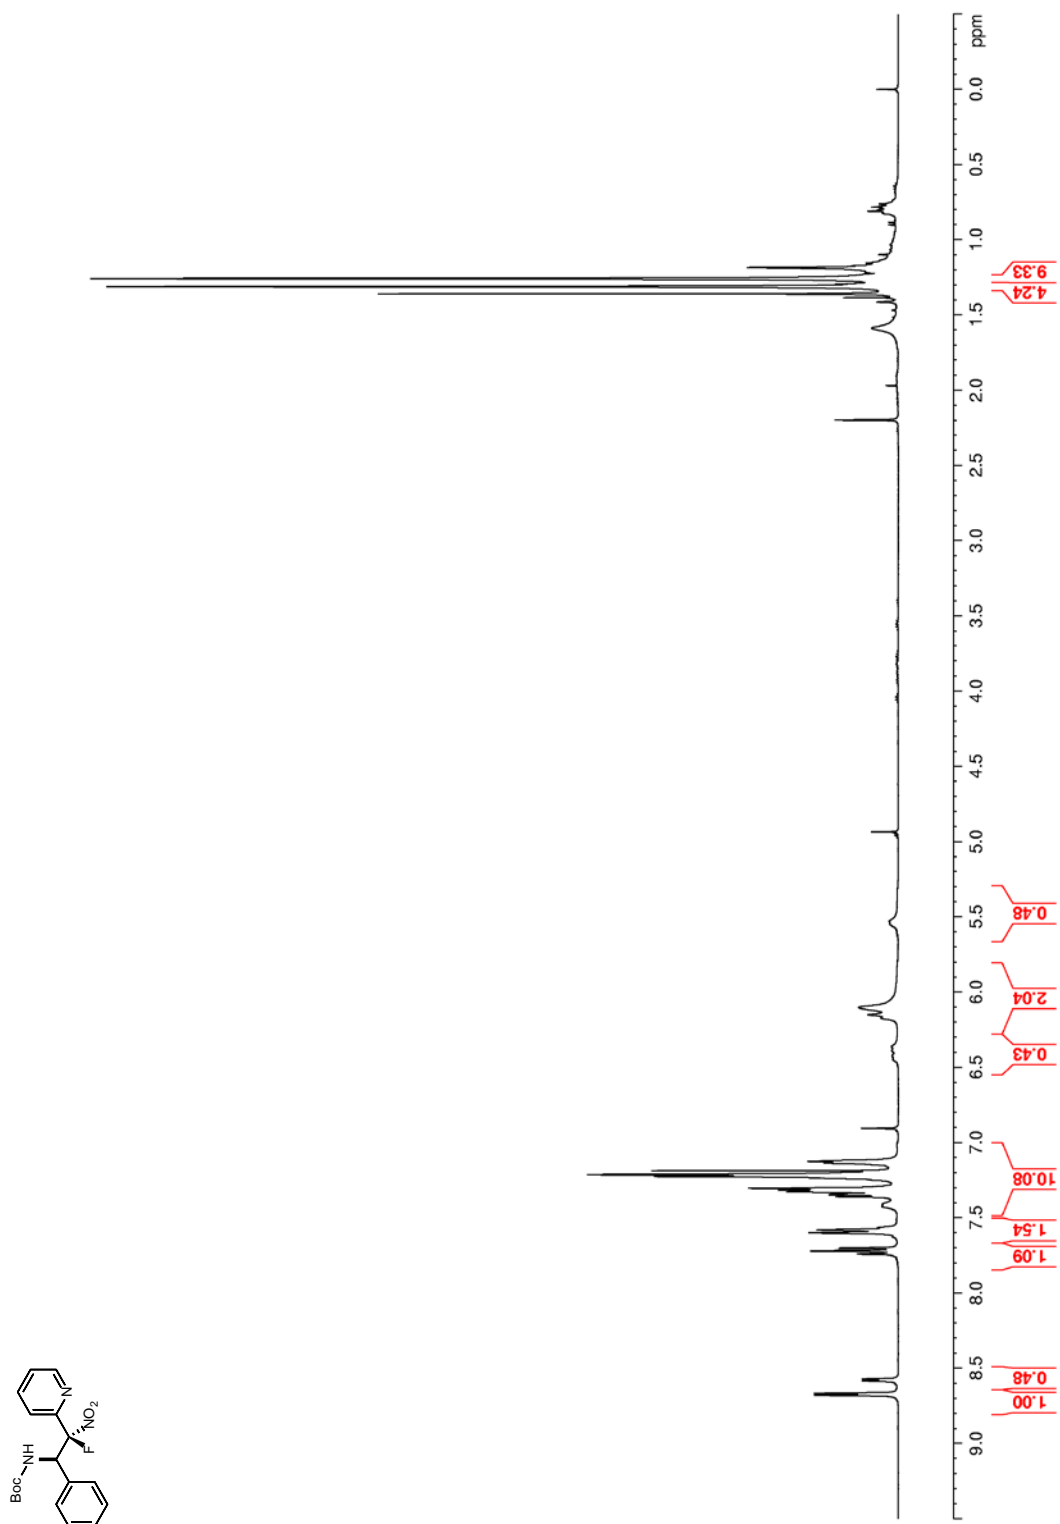

**Figure 16.**  $^{13}\text{C}$  NMR/DEPT135 (100 MHz,  $\text{CDCl}_3$ ) of **7f**

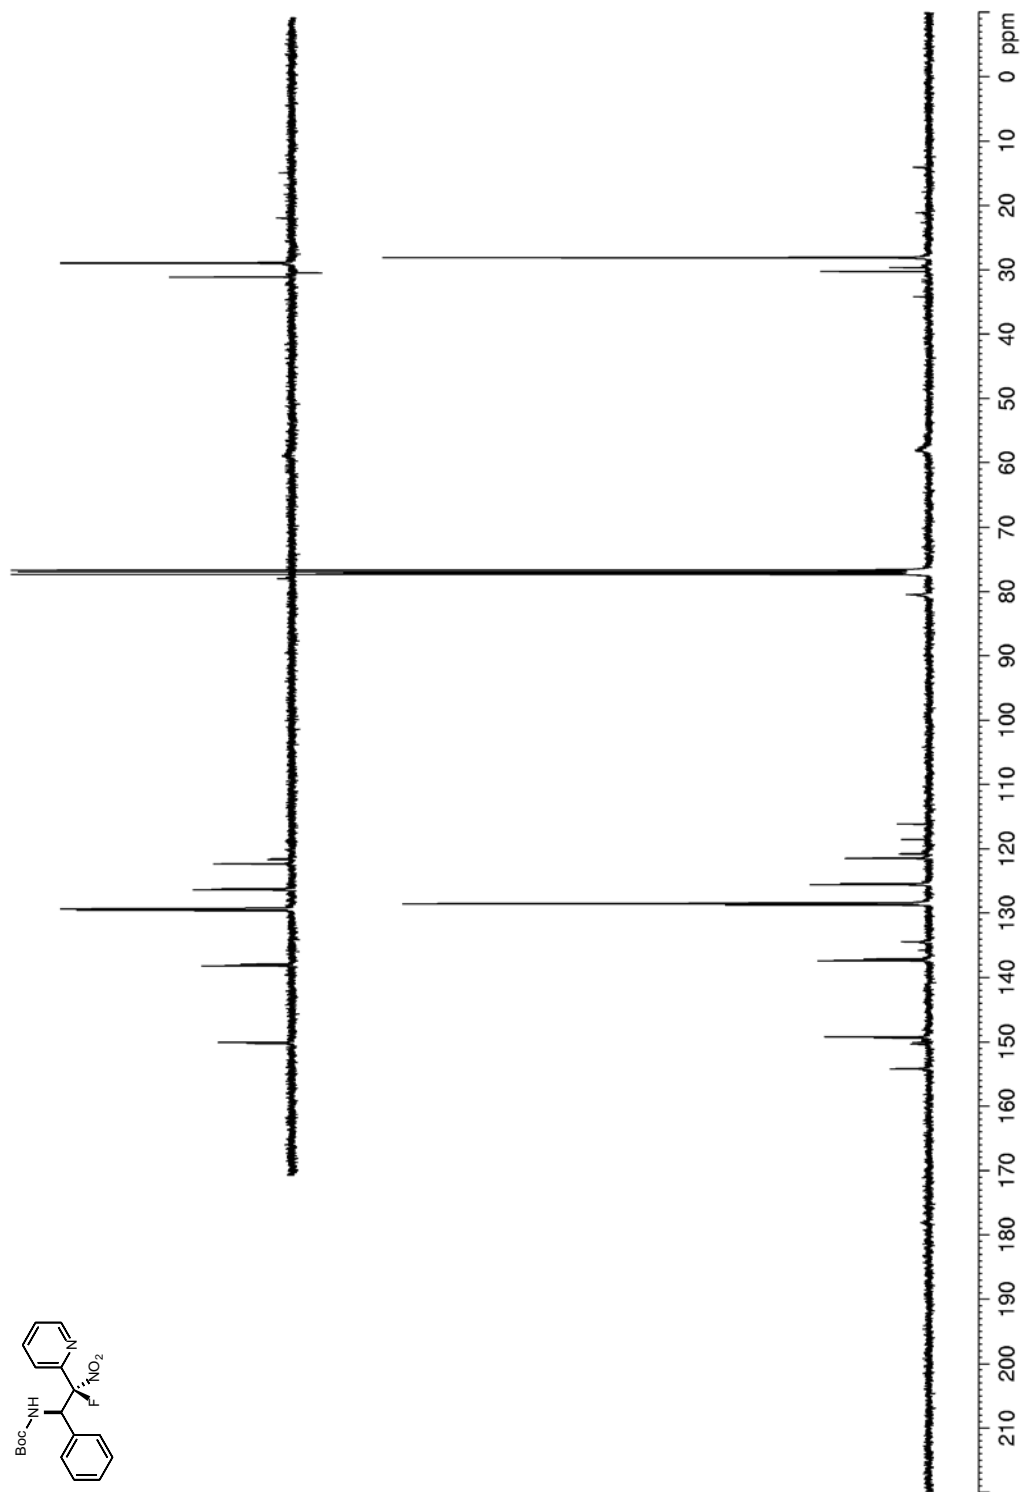

Figure 17.  $^1\text{H}$  NMR (400 MHz,  $\text{CDCl}_3$ ) of **7g**

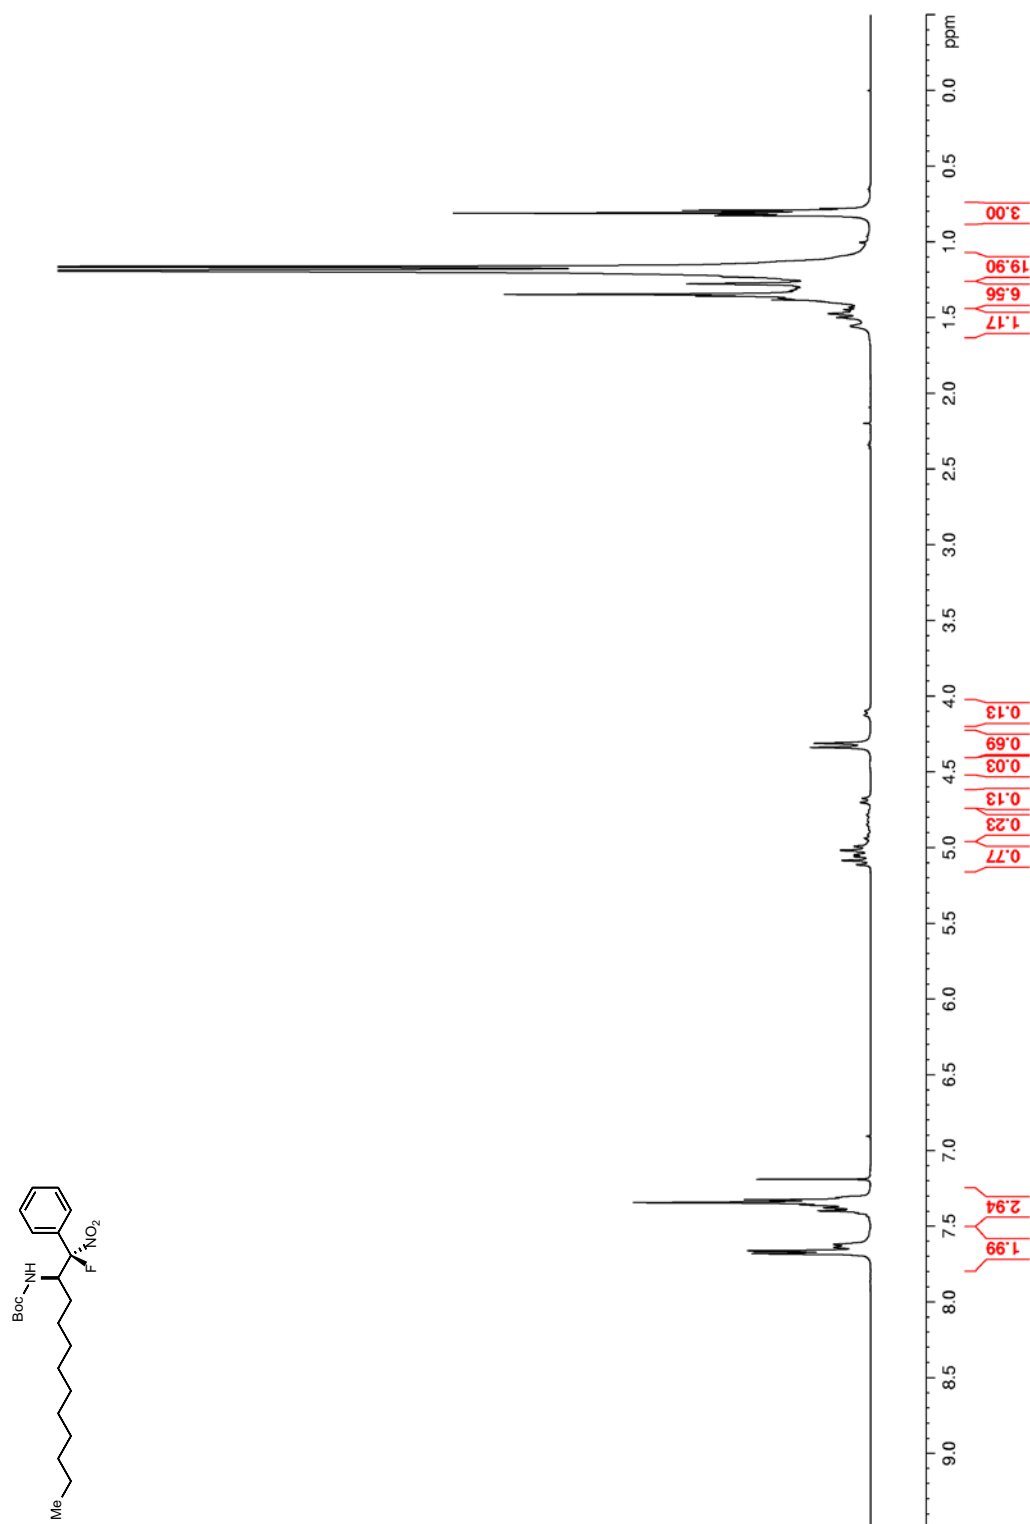

**Figure 18.**  $^{13}\text{C}$  NMR/DEPT135 (100 MHz,  $\text{CDCl}_3$ ) of **7g**

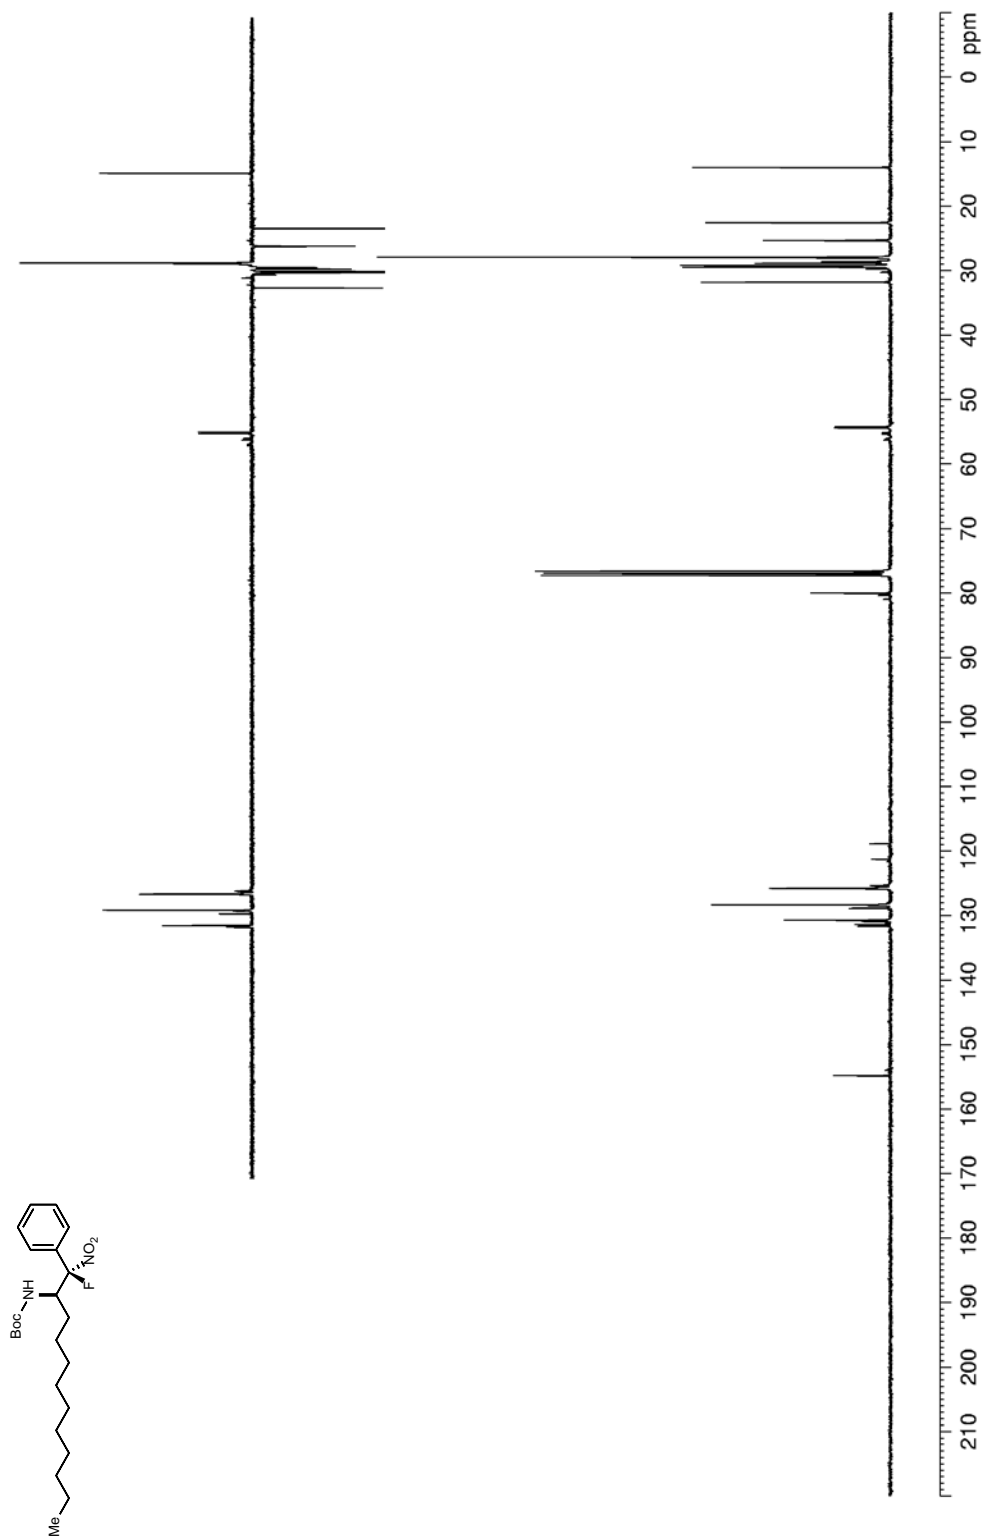

Figure 19.  $^1\text{H}$  NMR (600 MHz,  $\text{CDCl}_3$ ) of **7h**

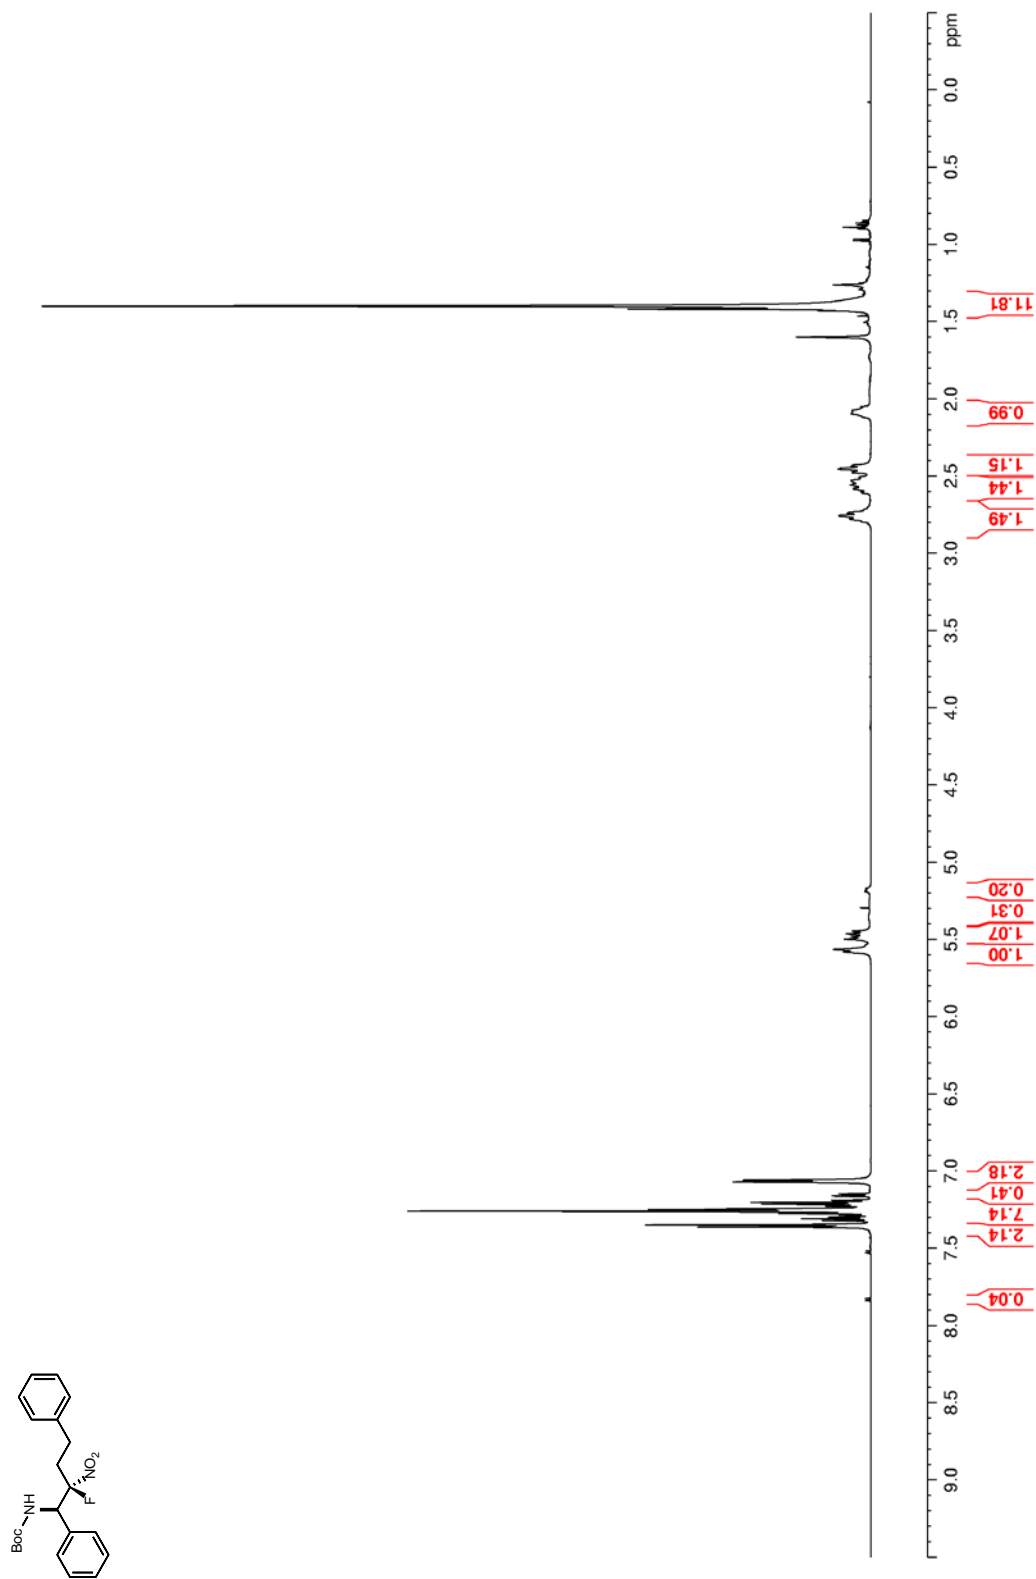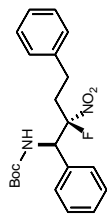

Figure 20.  $^{13}\text{C}$  NMR/DEPT135 (150 MHz,  $\text{CDCl}_3$ ) of **7h**

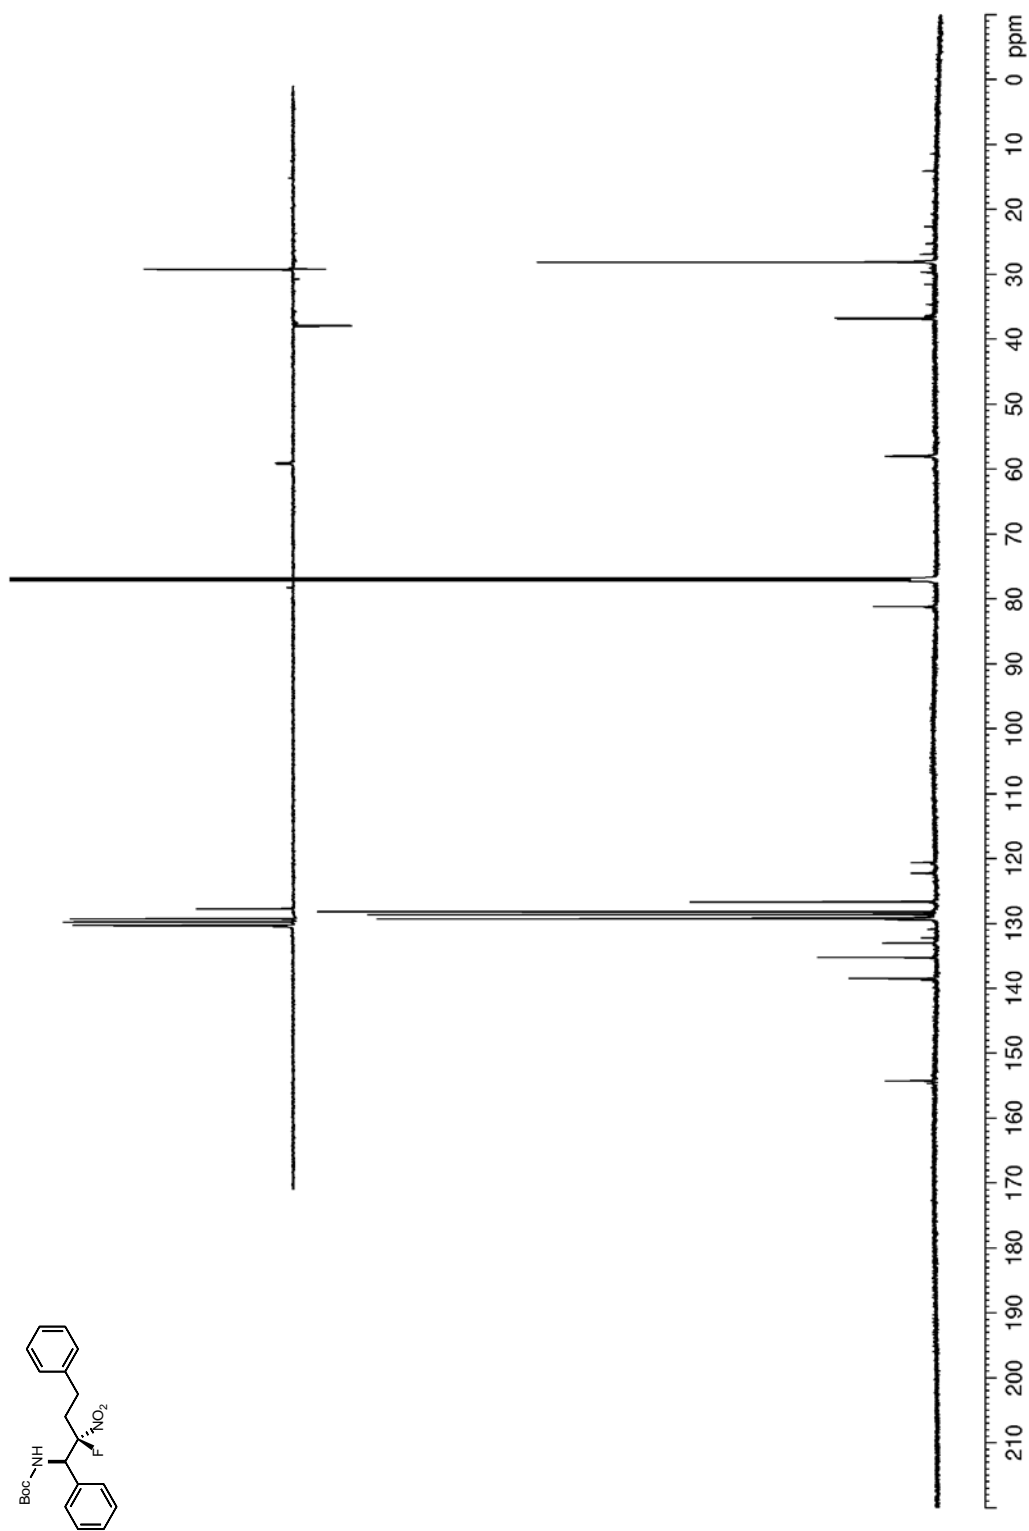

**Figure 21.**  $^1\text{H}$  NMR (600 MHz,  $\text{CDCl}_3$ ) of **7i**

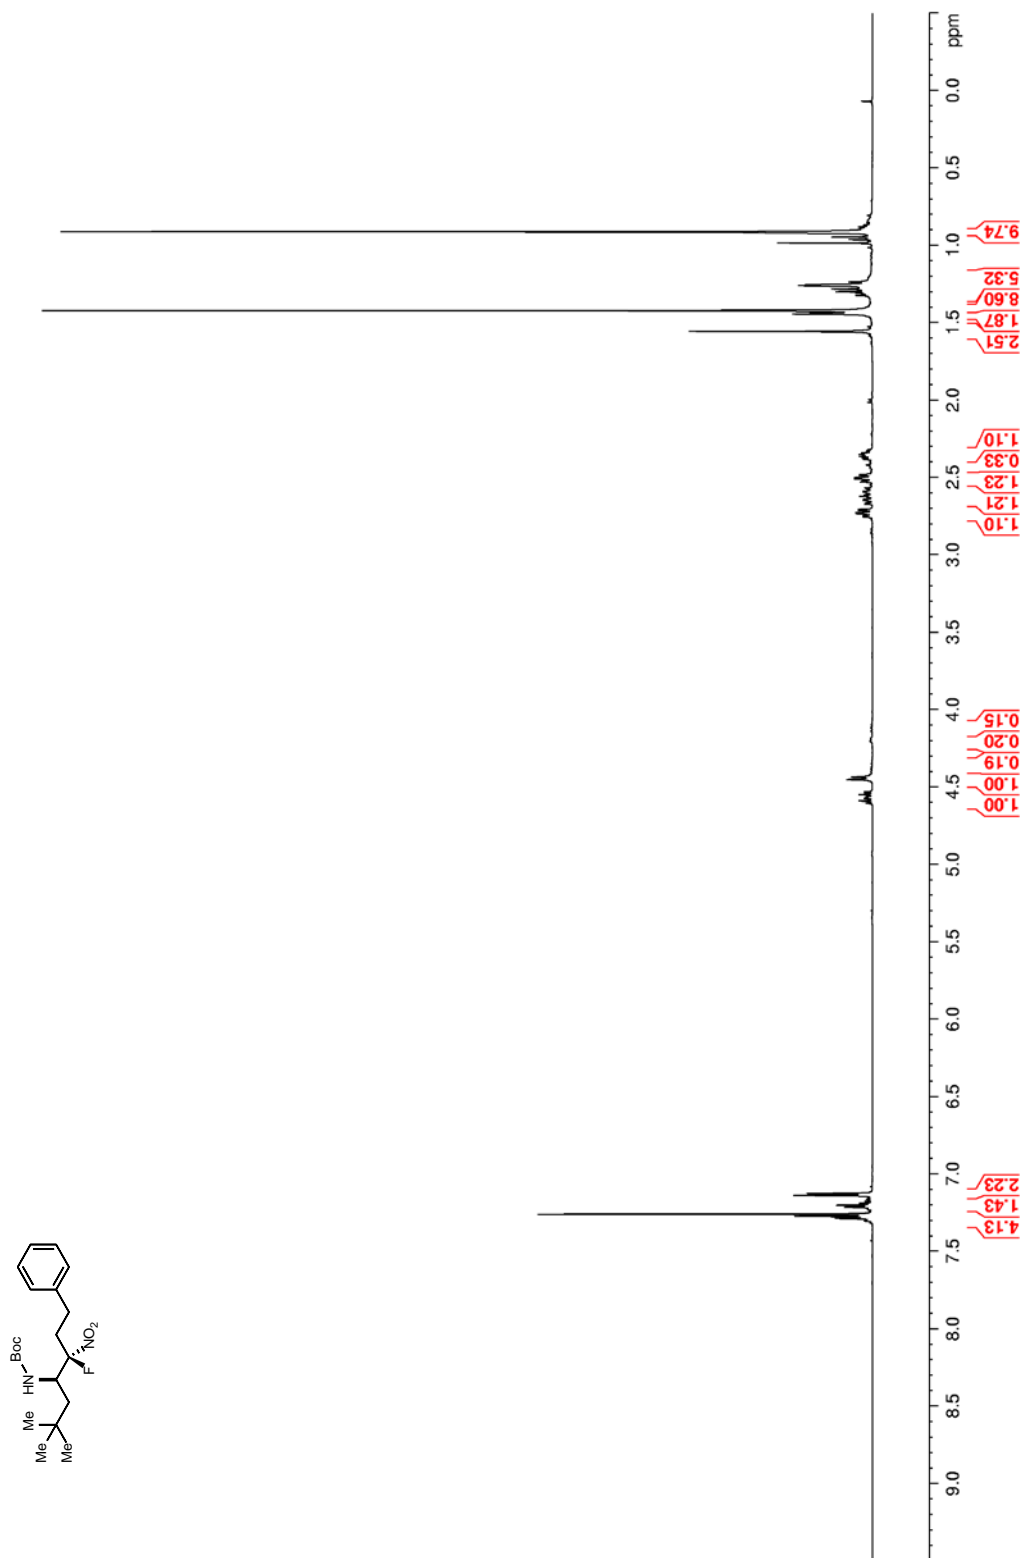

**Figure 22.**  $^{13}\text{C}$  NMR/DEPT135 (150 MHz,  $\text{CDCl}_3$ ) of **7i**

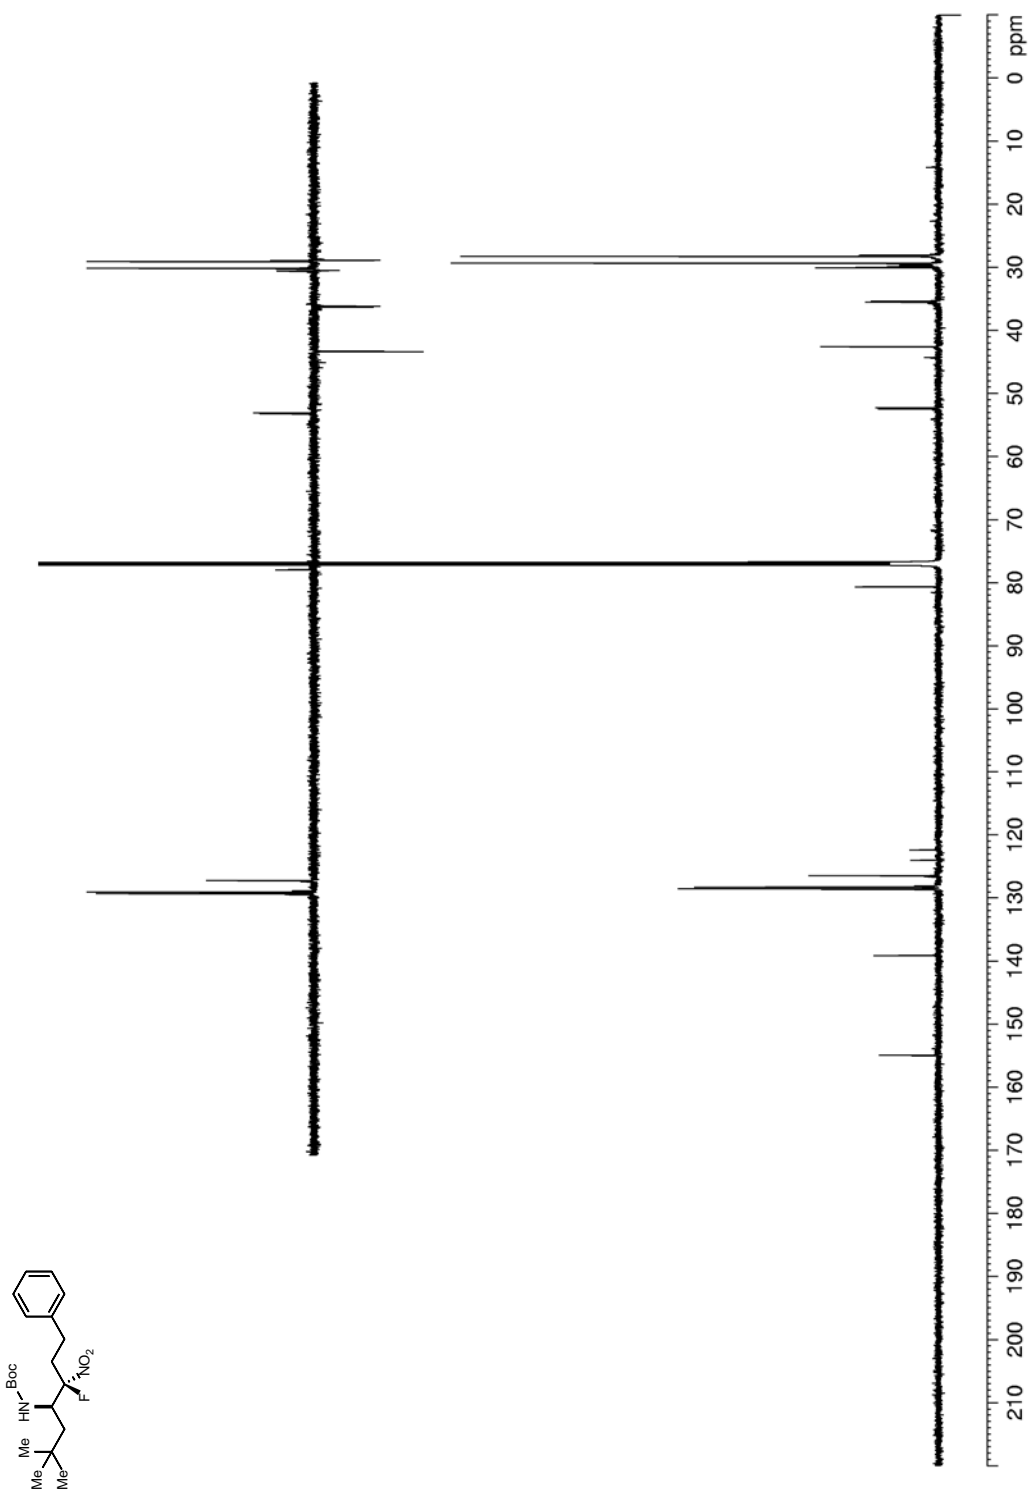



**Figure 23.**  $^1\text{H}$  NMR (600 MHz,  $\text{CDCl}_3$ ) of **7j**

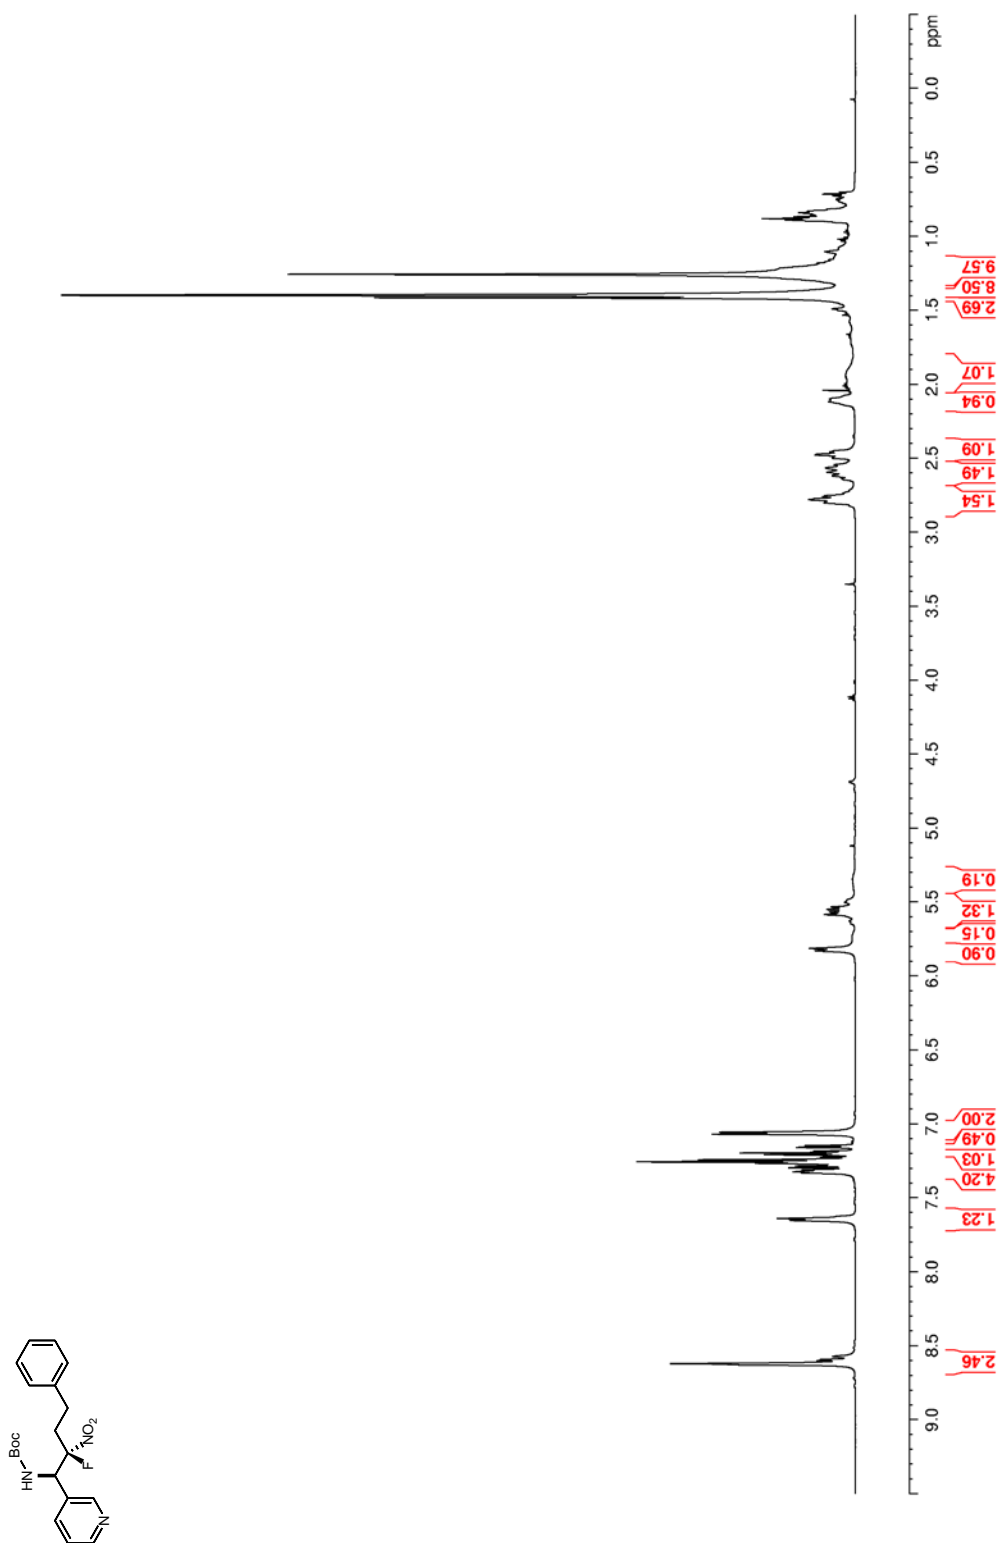

**Figure 24.**  $^{13}\text{C}$  NMR/DEPT135 (150 MHz,  $\text{CDCl}_3$ ) of **7j**

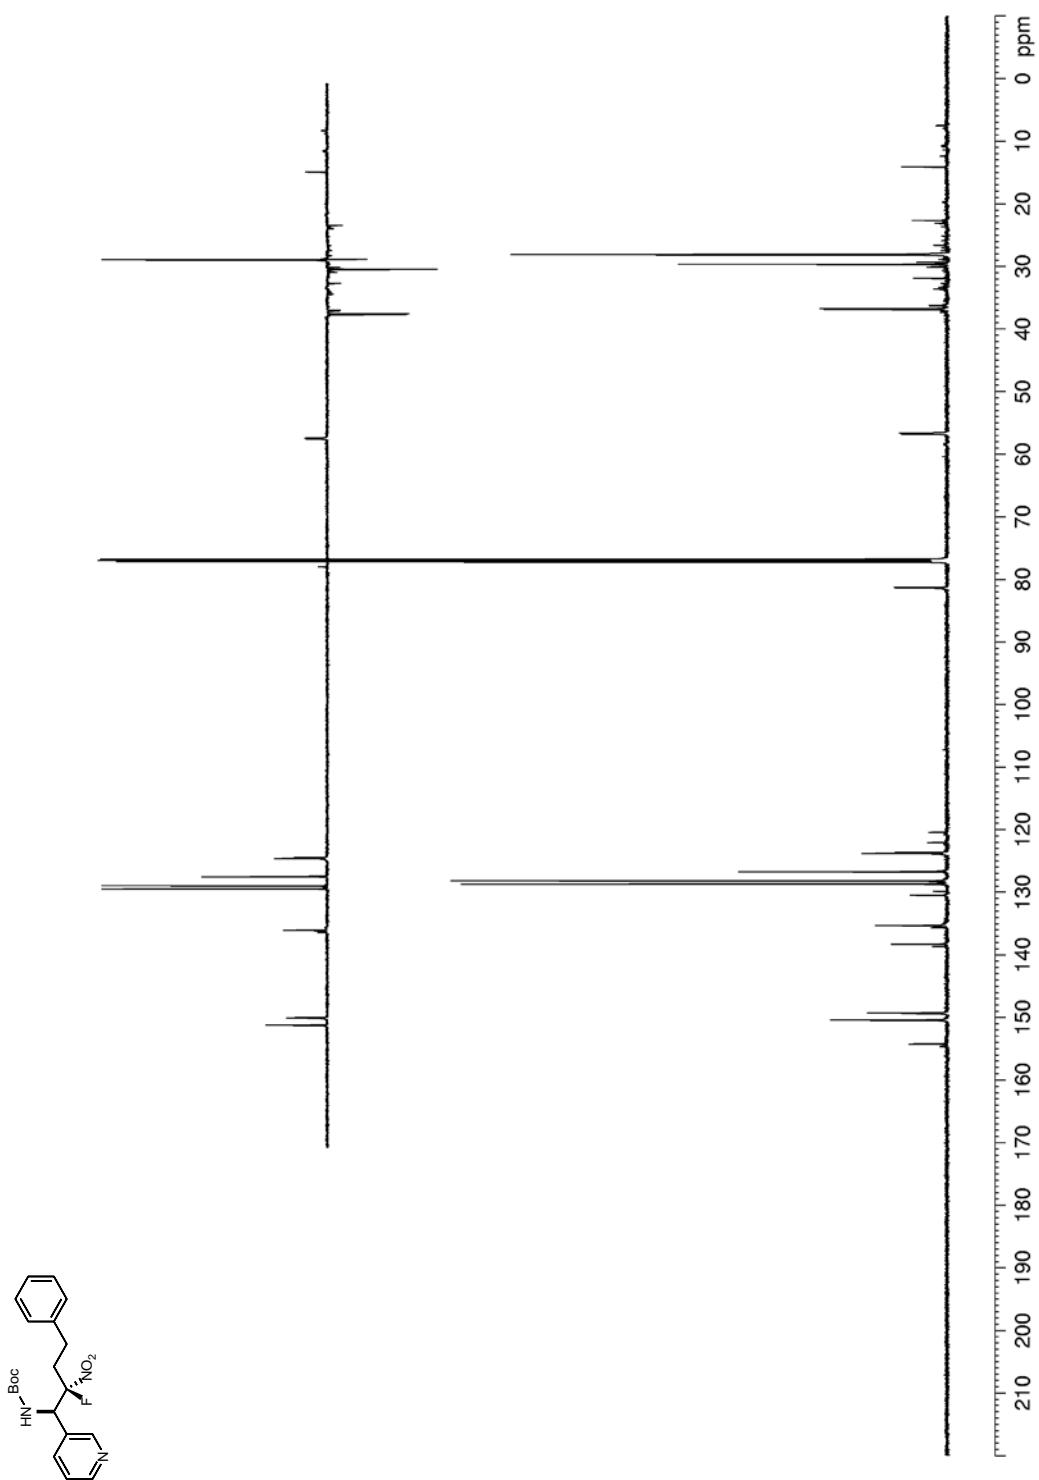

Figure 25.  $^1\text{H}$  NMR (600 MHz, MeOD) of *cis*-8

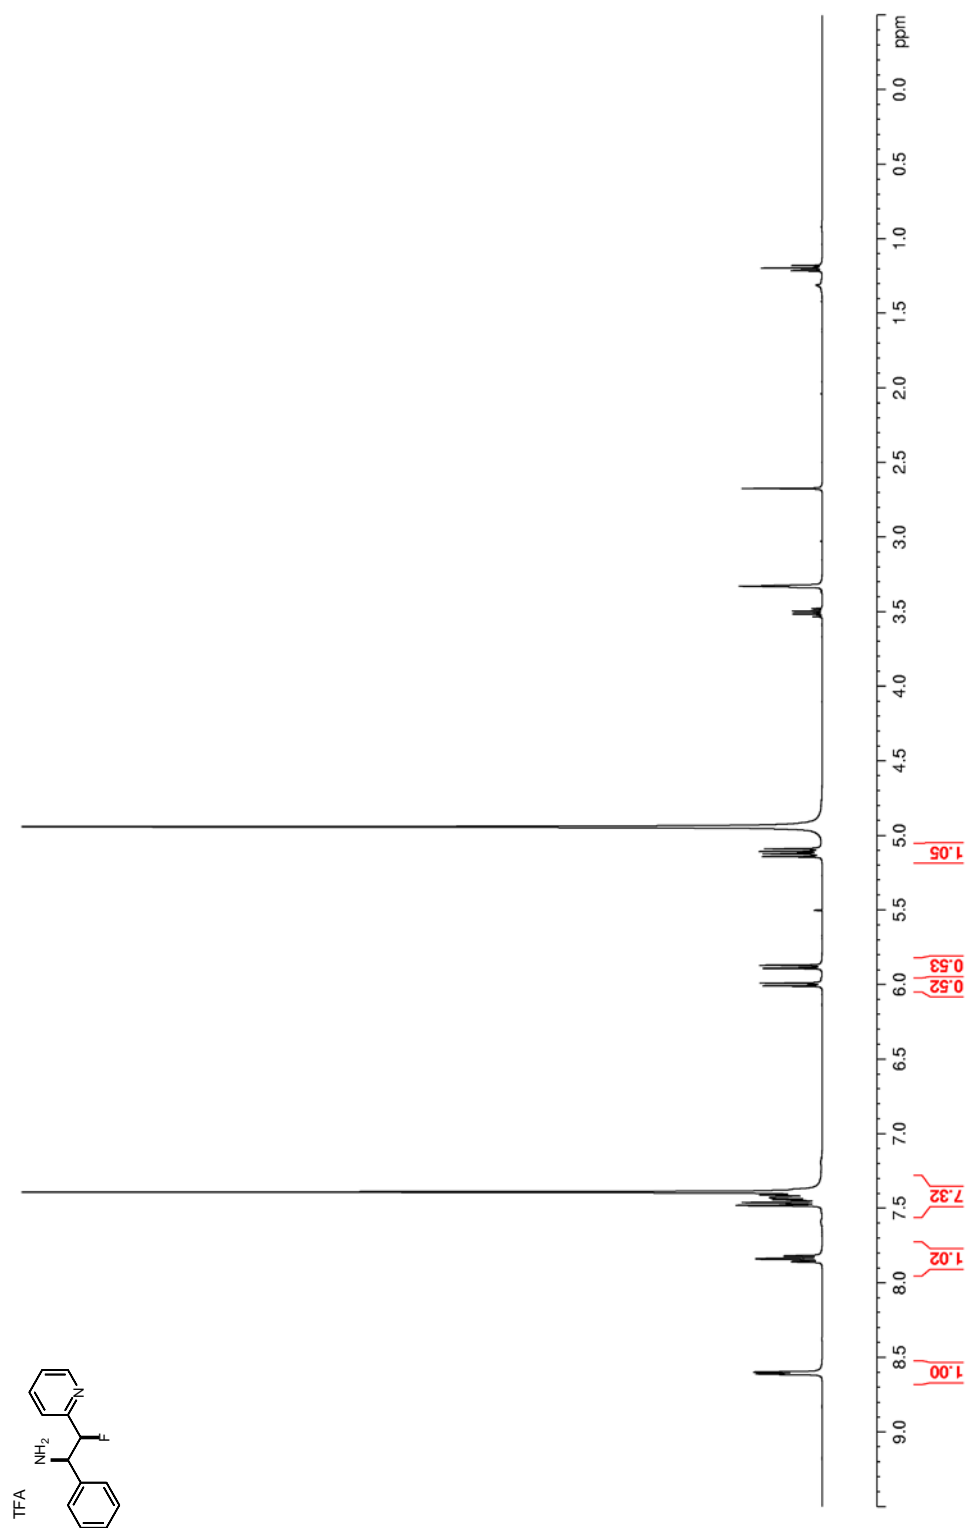

Figure 26.  $^{13}\text{C}$  NMR/DEPT135 (150 MHz, MeOD) of *cis*-8

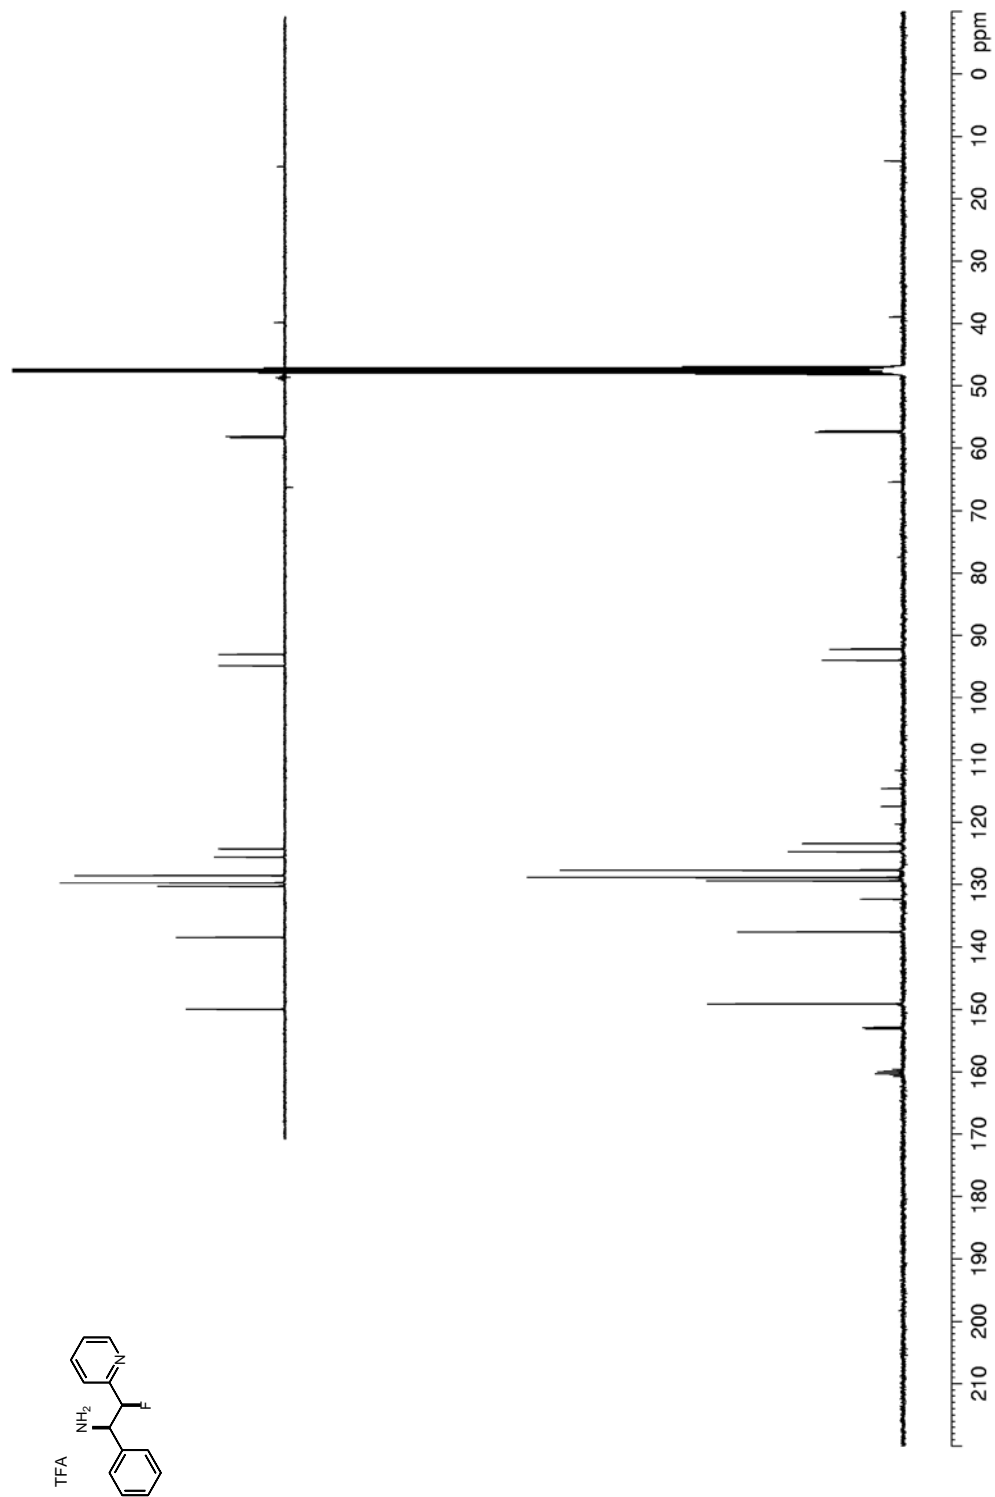

Figure 27.  $^1\text{H}$  NMR (400 MHz, MeOD) of *trans*-8

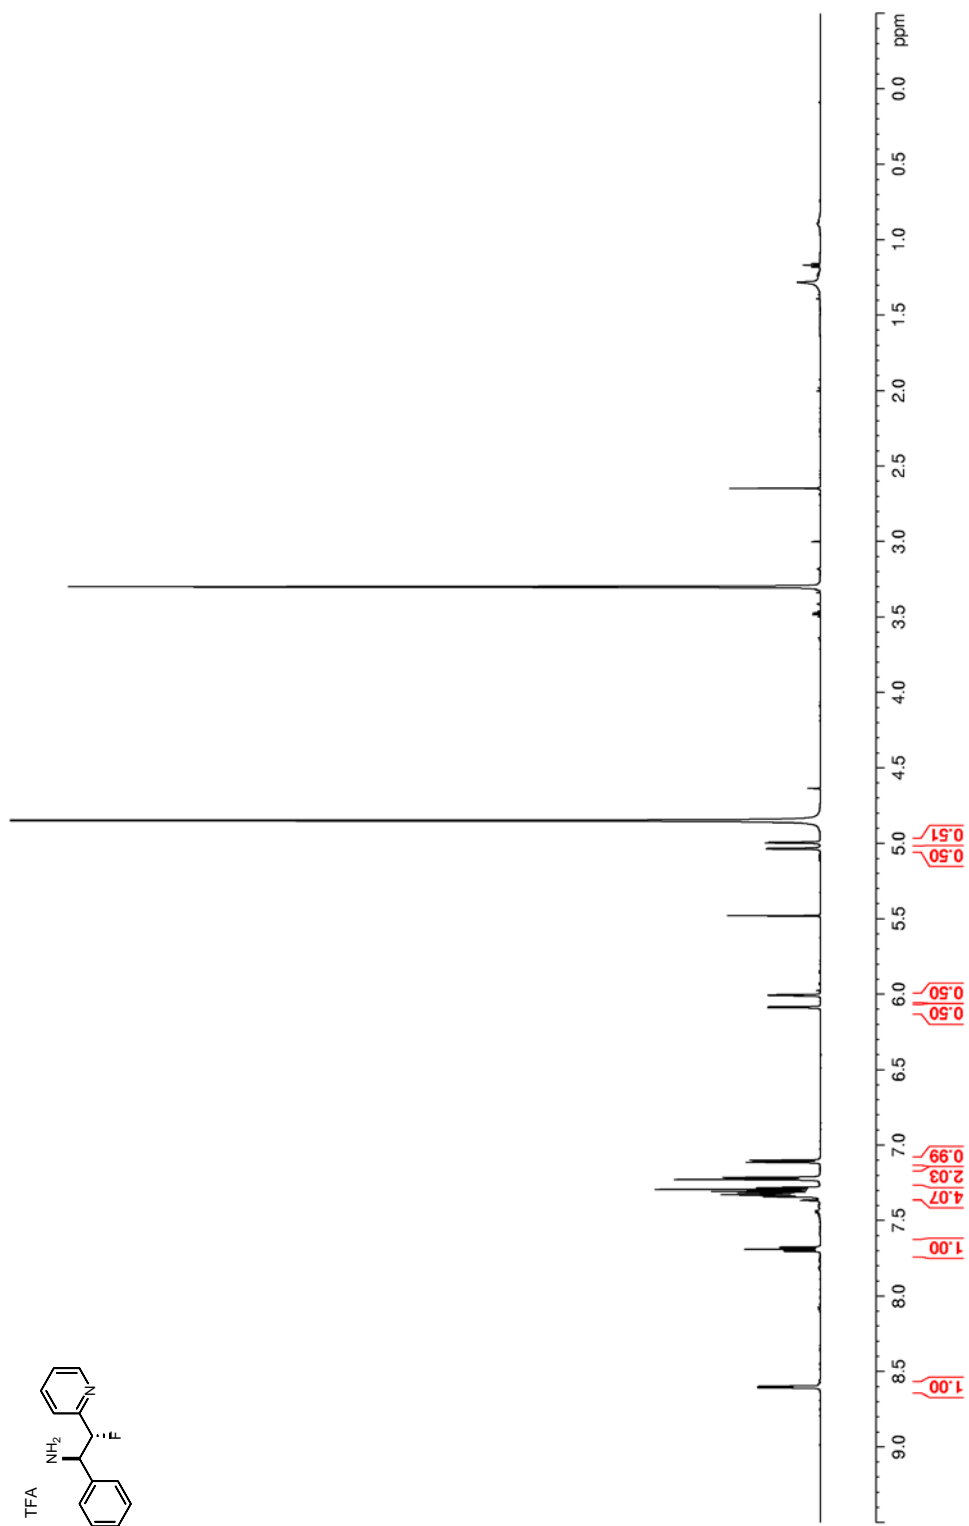

Figure 28.  $^{13}\text{C}$  NMR/DEPT135 (100 MHz, MeOD) of *trans*-8

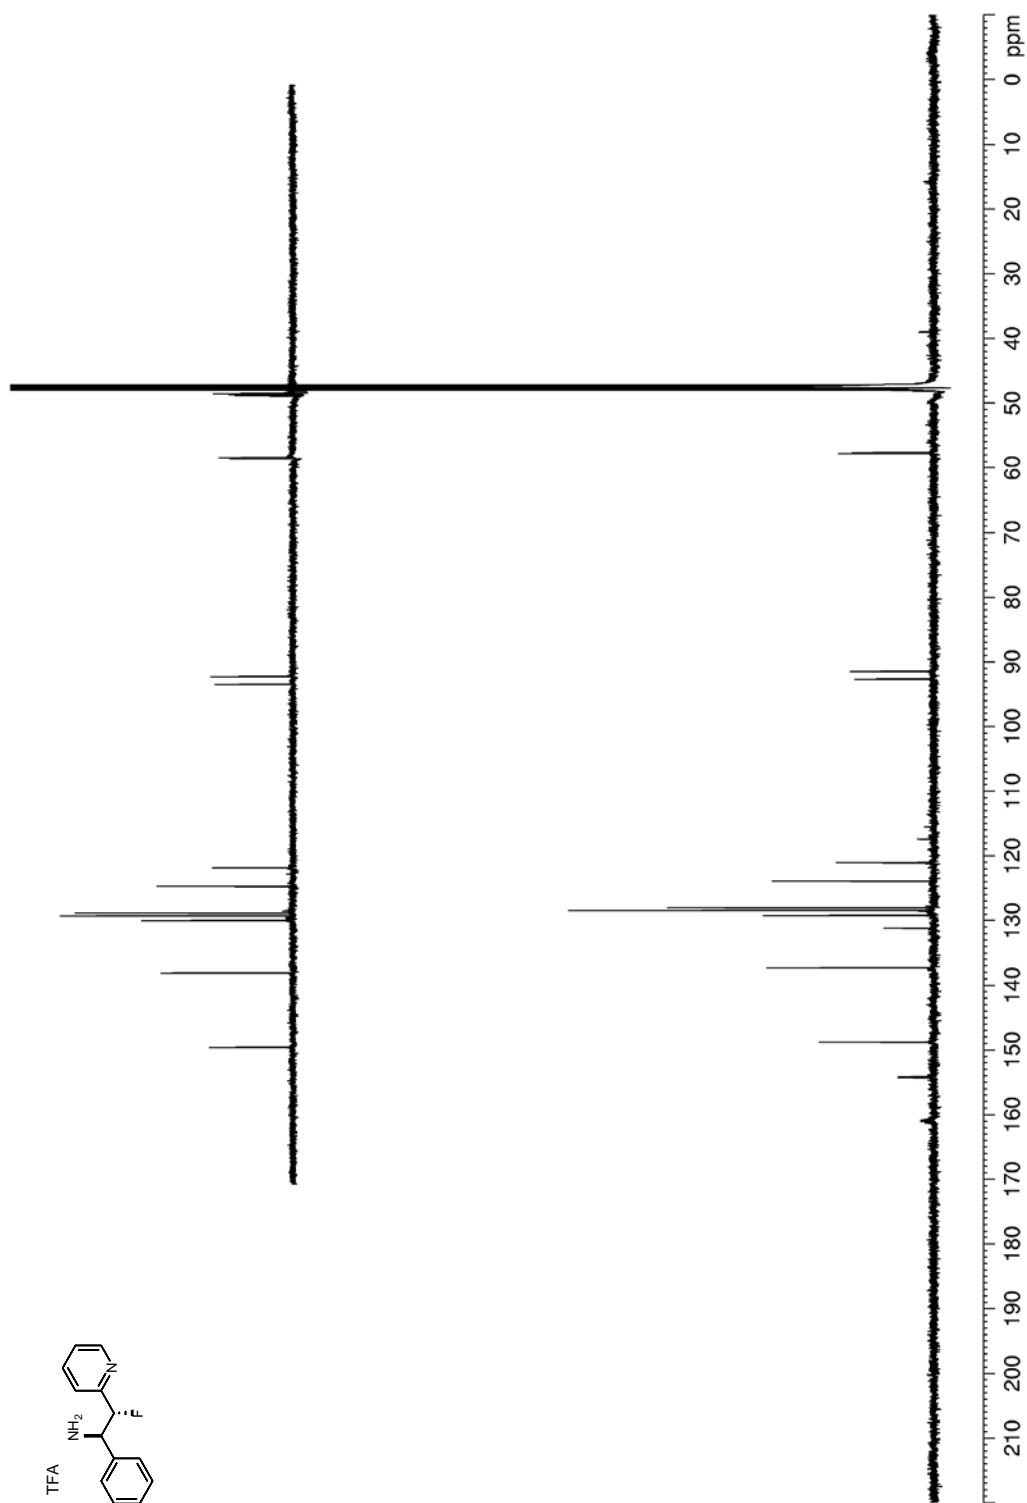

Figure 29.  $^1\text{H}$  NMR (400 MHz,  $\text{CDCl}_3$ ) of **9**

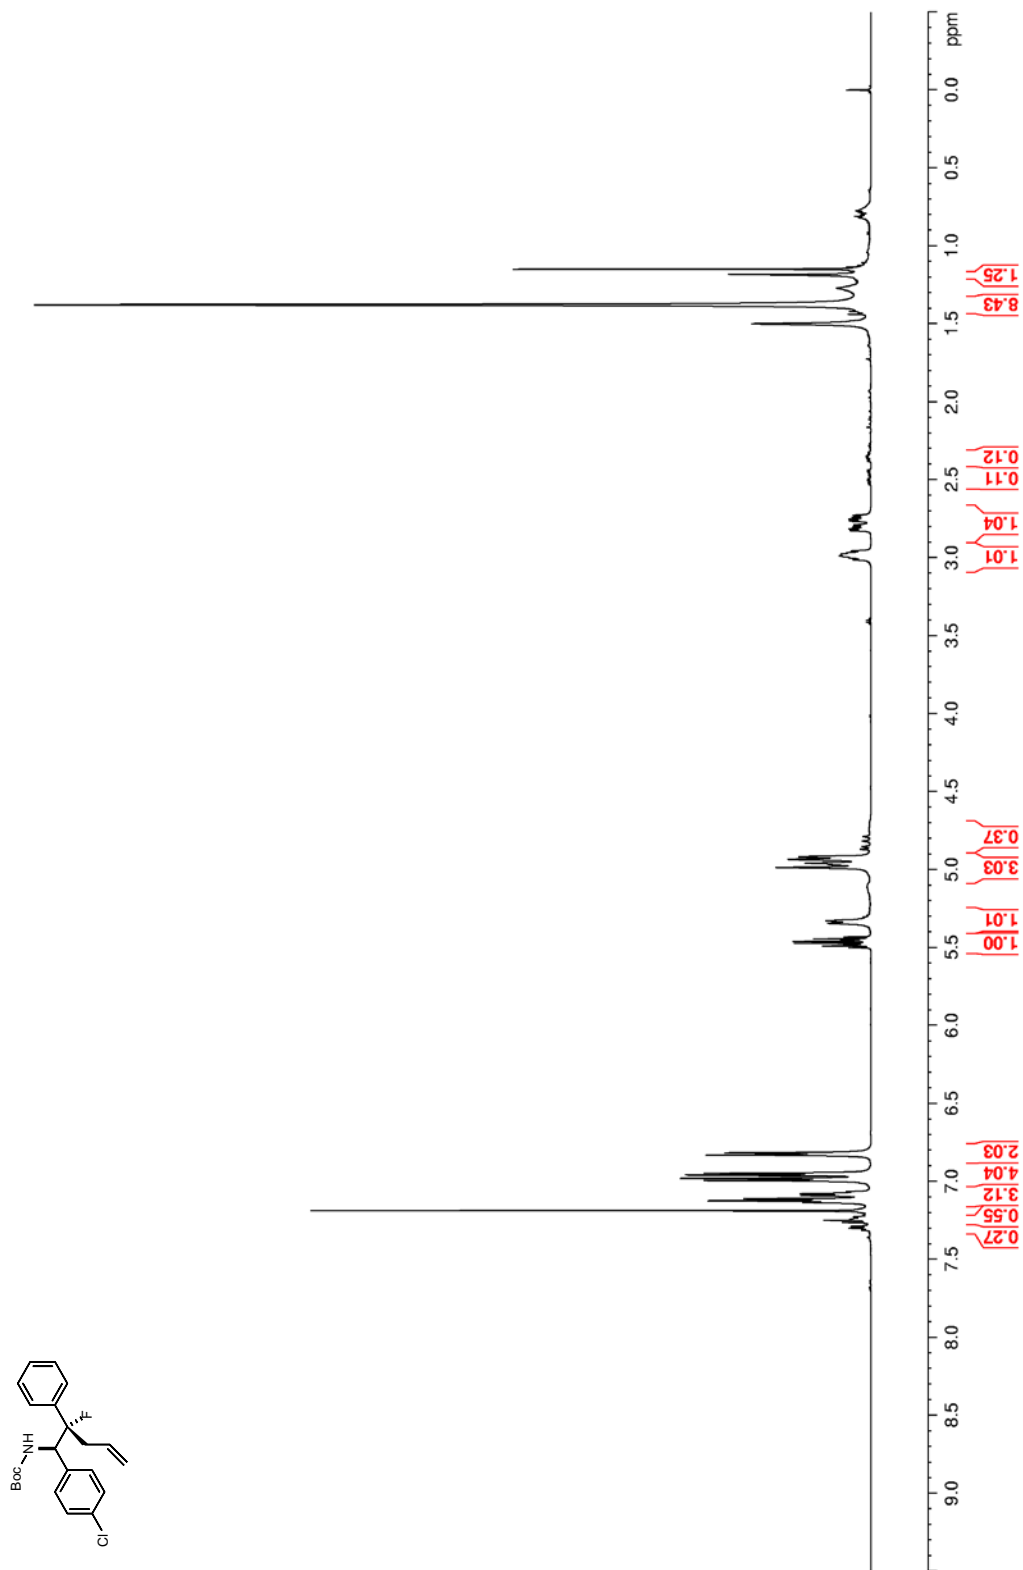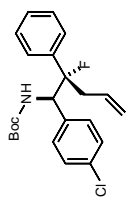

Figure 30.  $^{13}\text{C}$  NMR/DEPT135 (100 MHz,  $\text{CDCl}_3$ ) of **9**

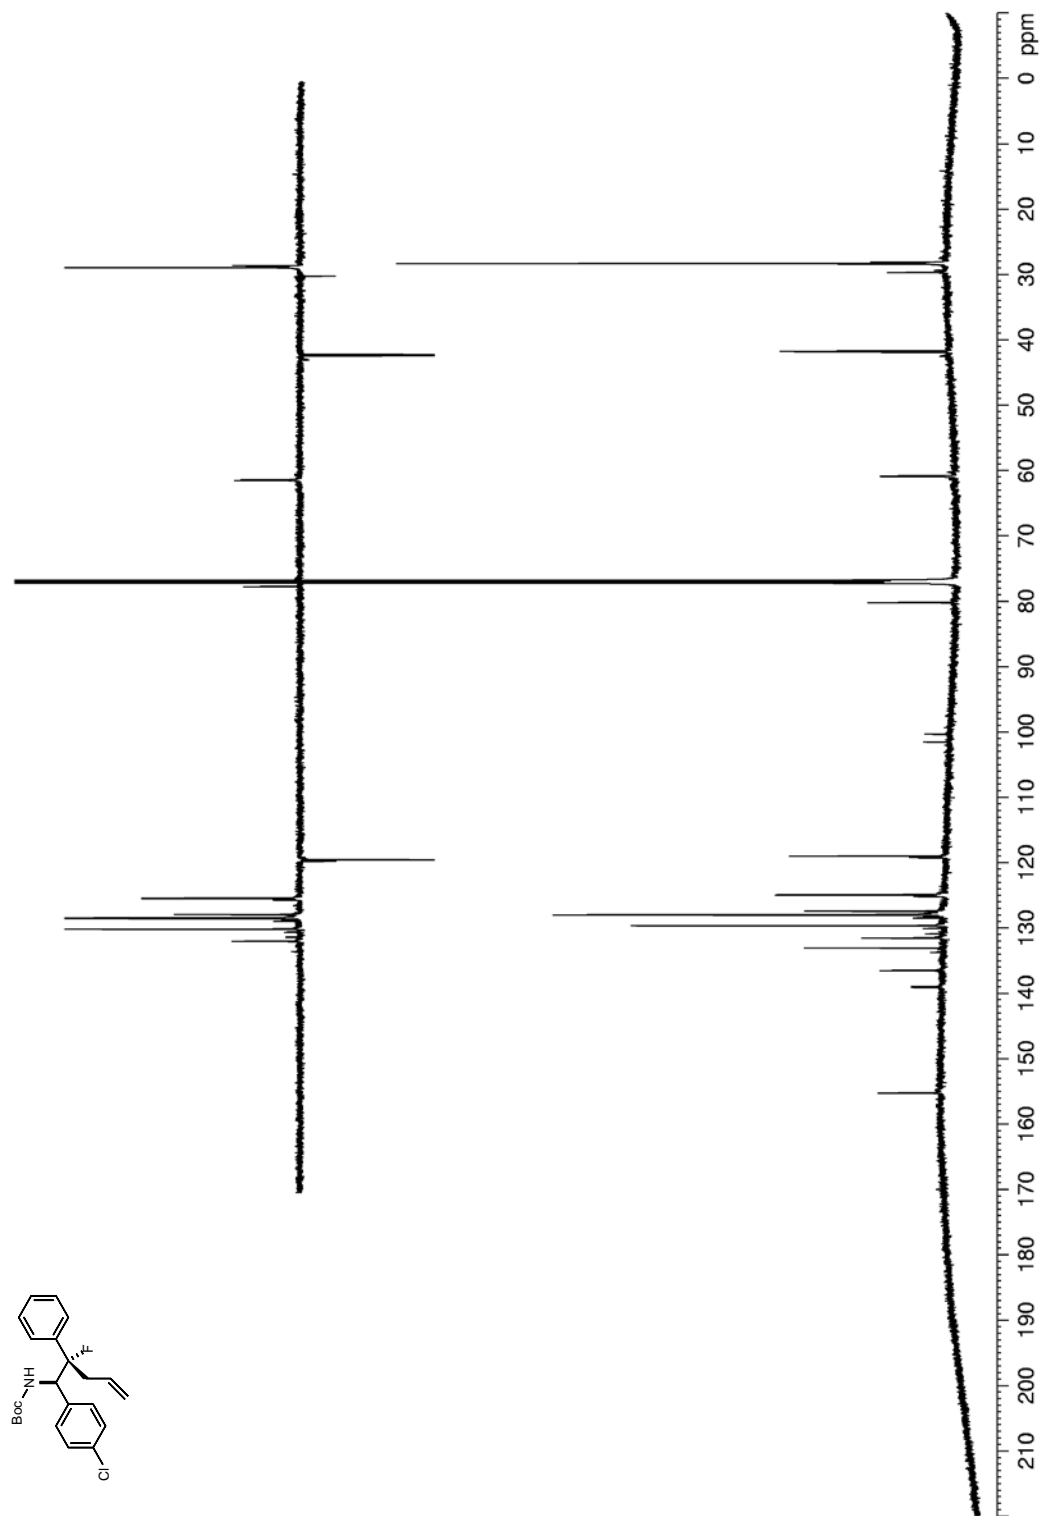



**Figure 31.**  $^1\text{H}$  NMR (400 MHz,  $\text{CDCl}_3$ ) of **10**

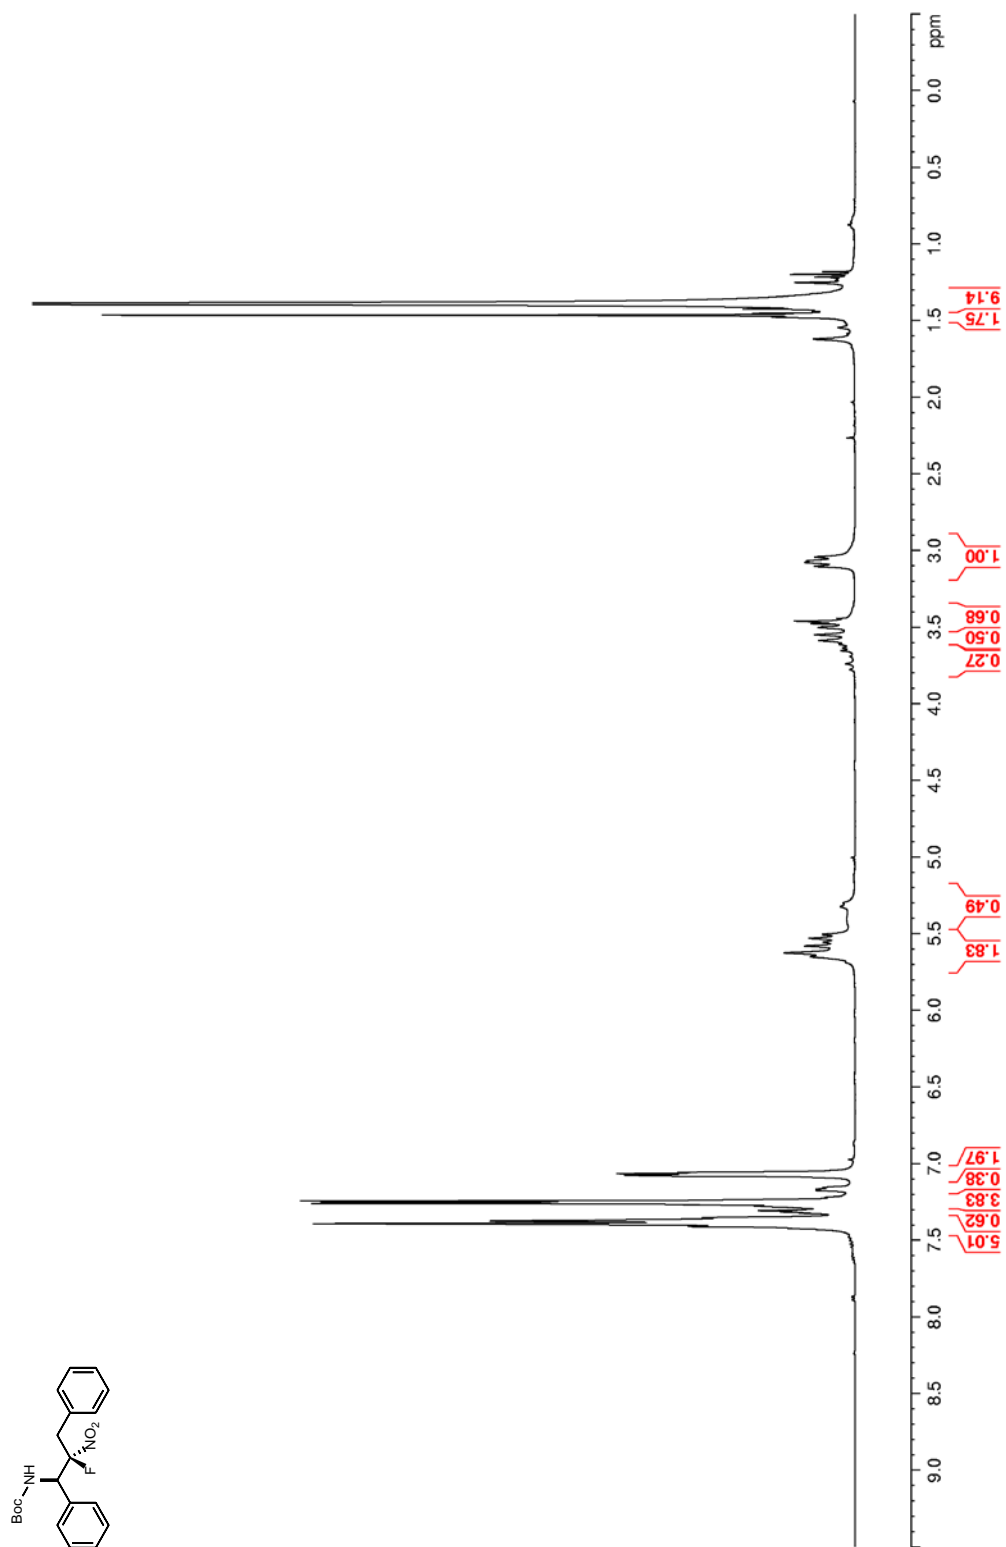

**Figure 32.**  $^{13}\text{C}$  NMR/DEPT135 (100 MHz,  $\text{CDCl}_3$ ) of **10**

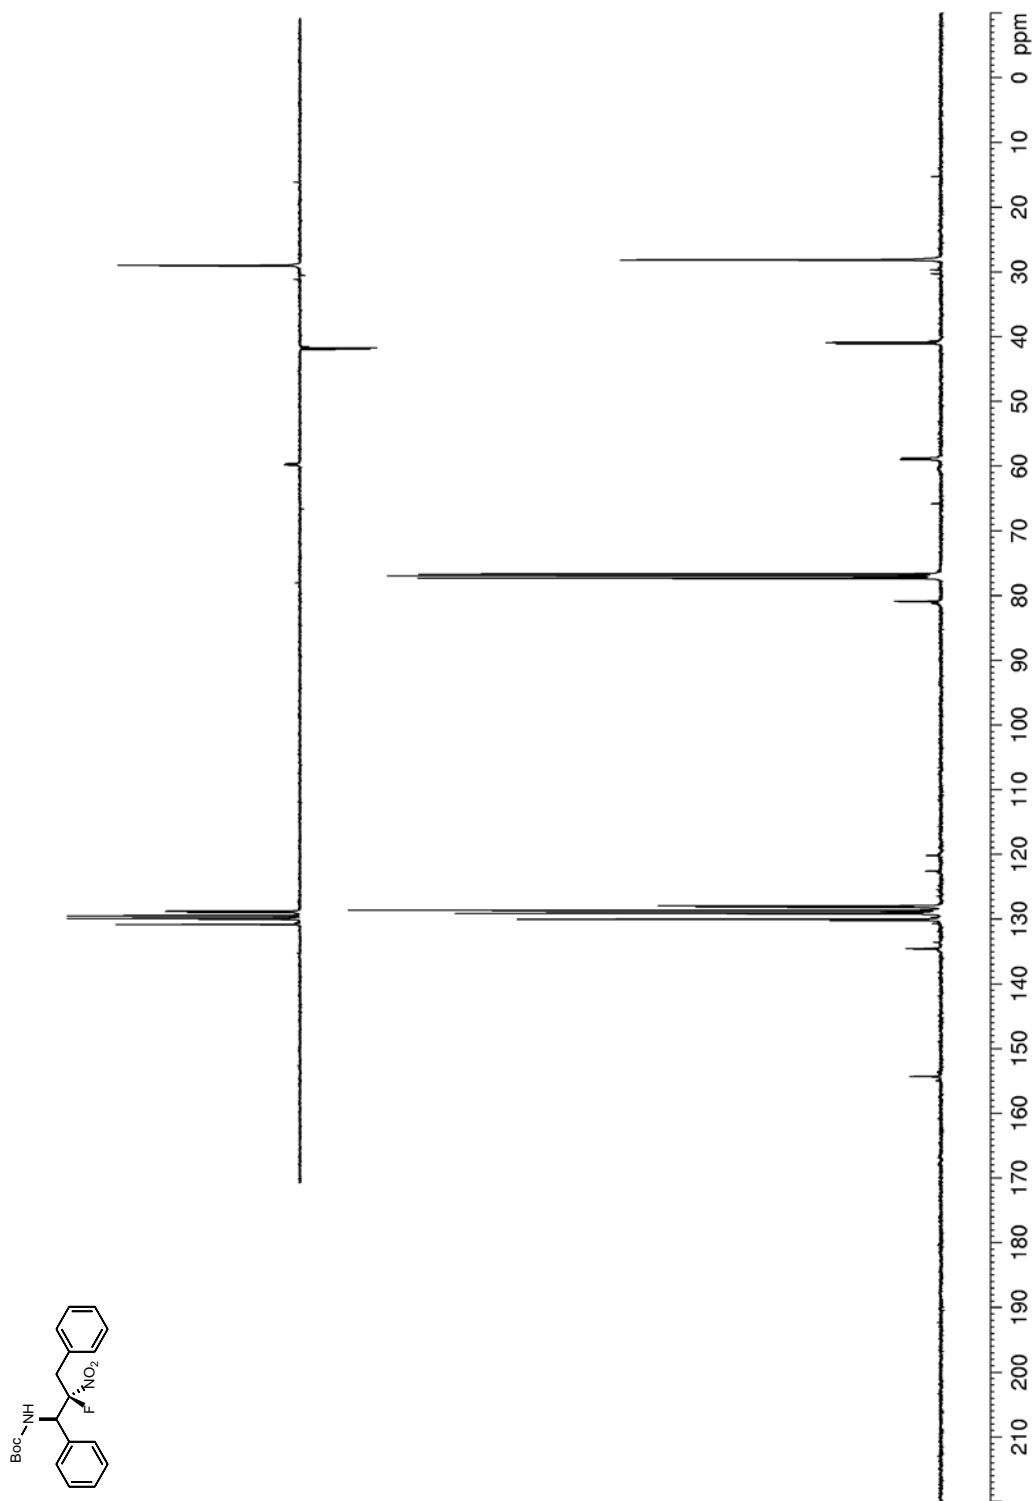

Figure 33.  $^1\text{H}$  NMR (400 MHz,  $\text{CDCl}_3$ ) of **11**

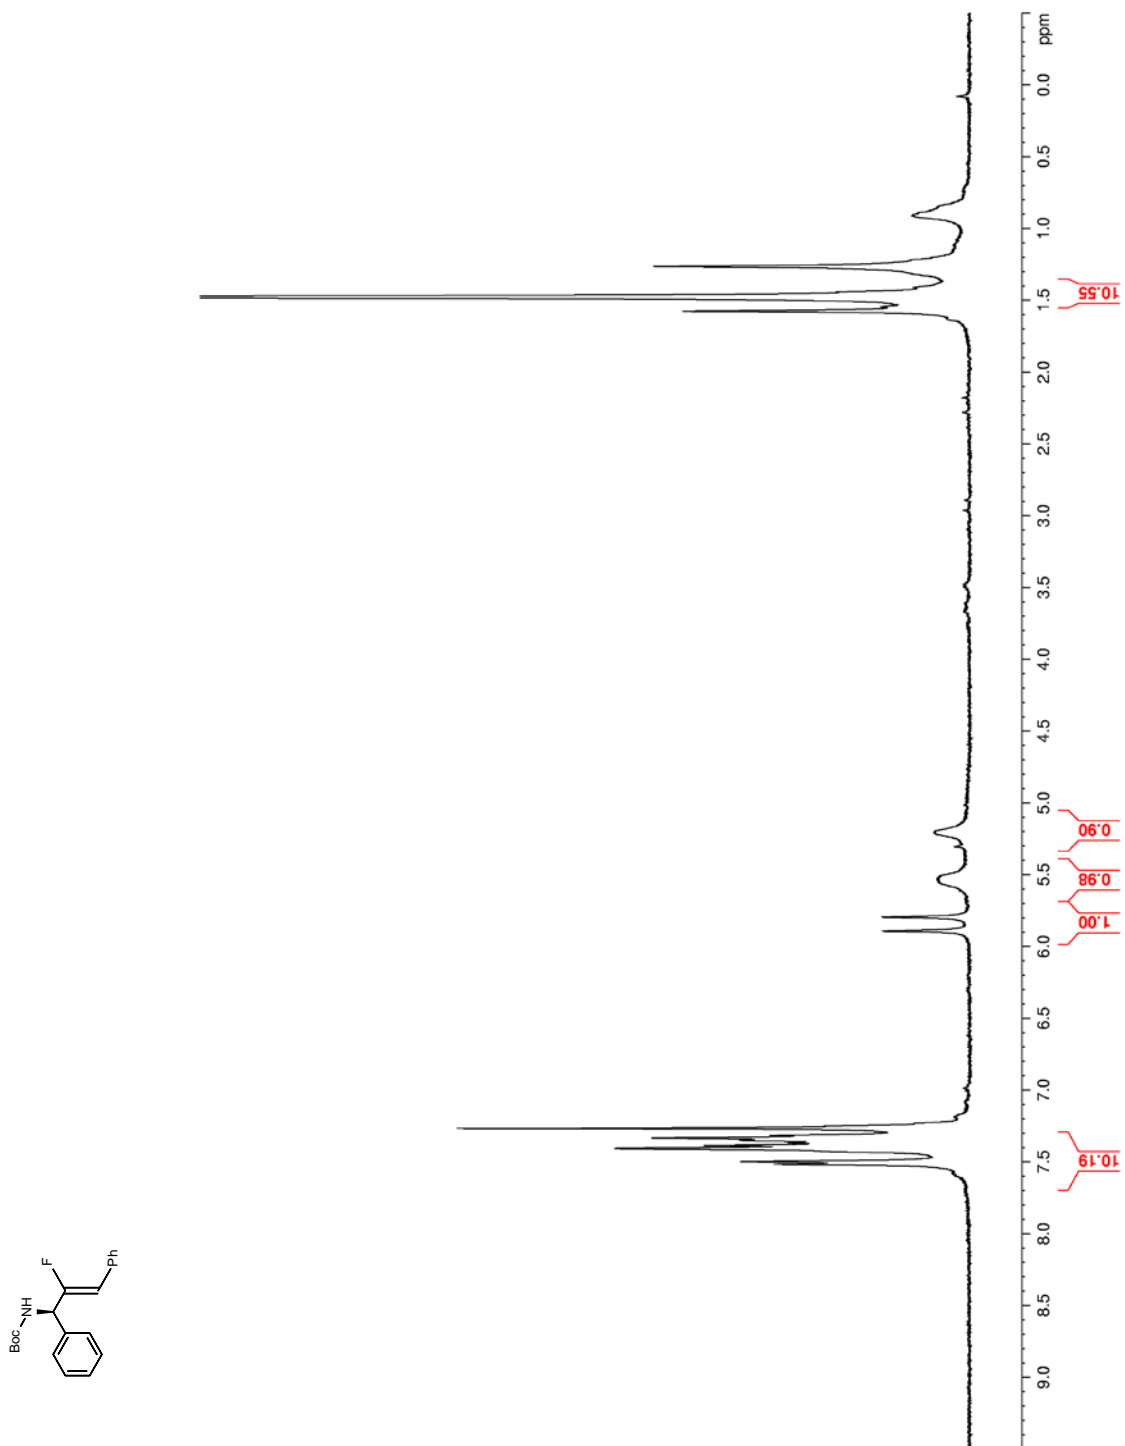

**Figure 34.**  $^{13}\text{C}$  NMR/DEPT135 (100 MHz,  $\text{CDCl}_3$ ) of **11**

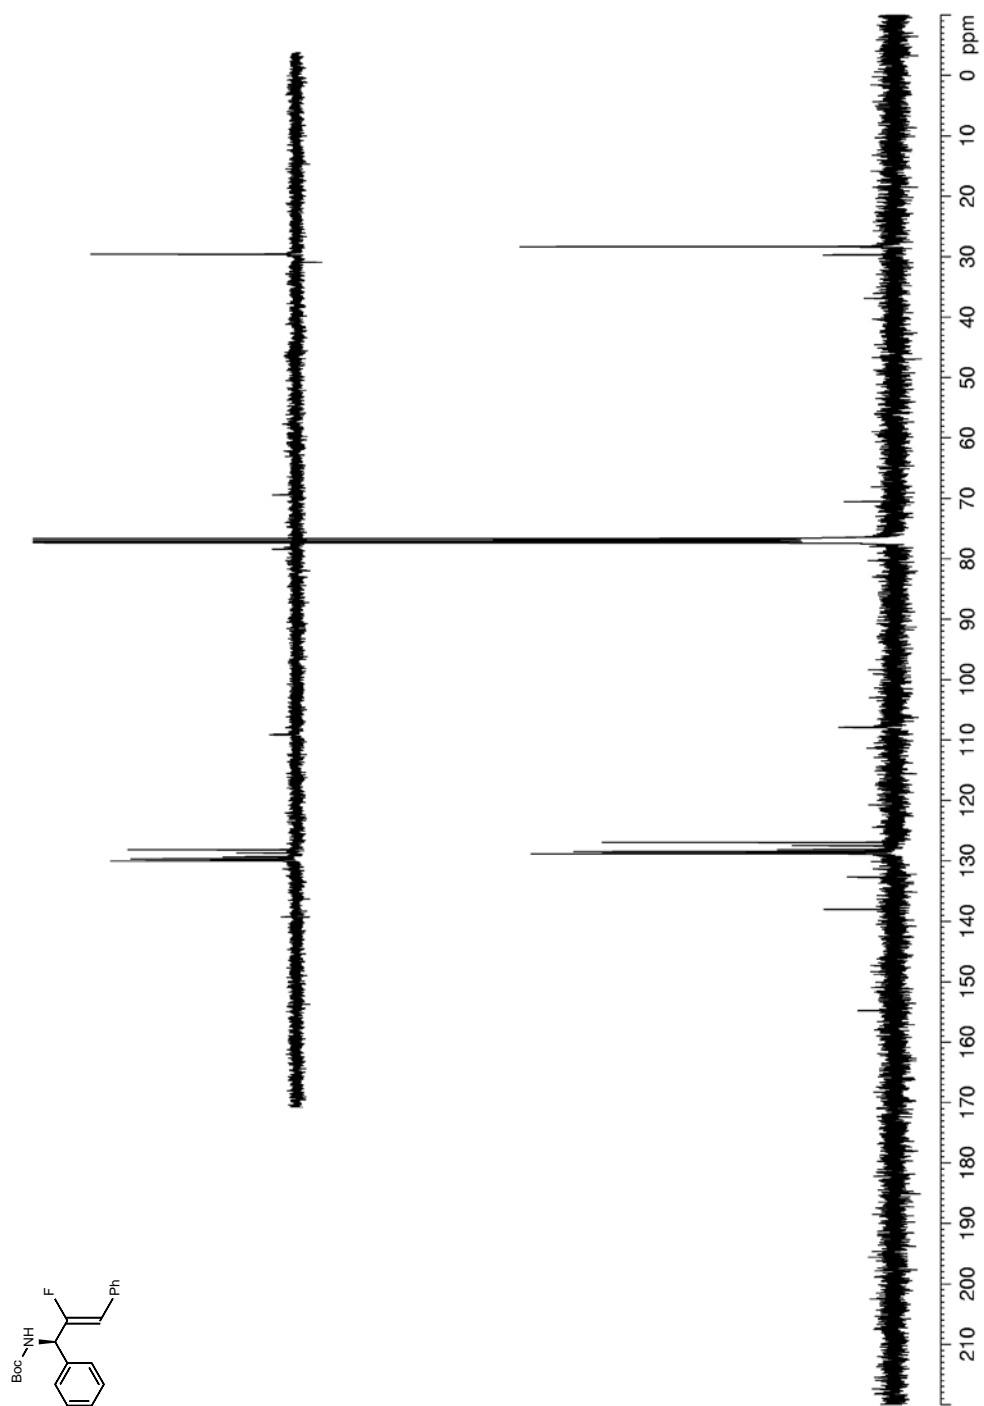

**Figure 35.**  $^1\text{H}$  NMR (600 MHz,  $\text{CDCl}_3$ ) of **S1**

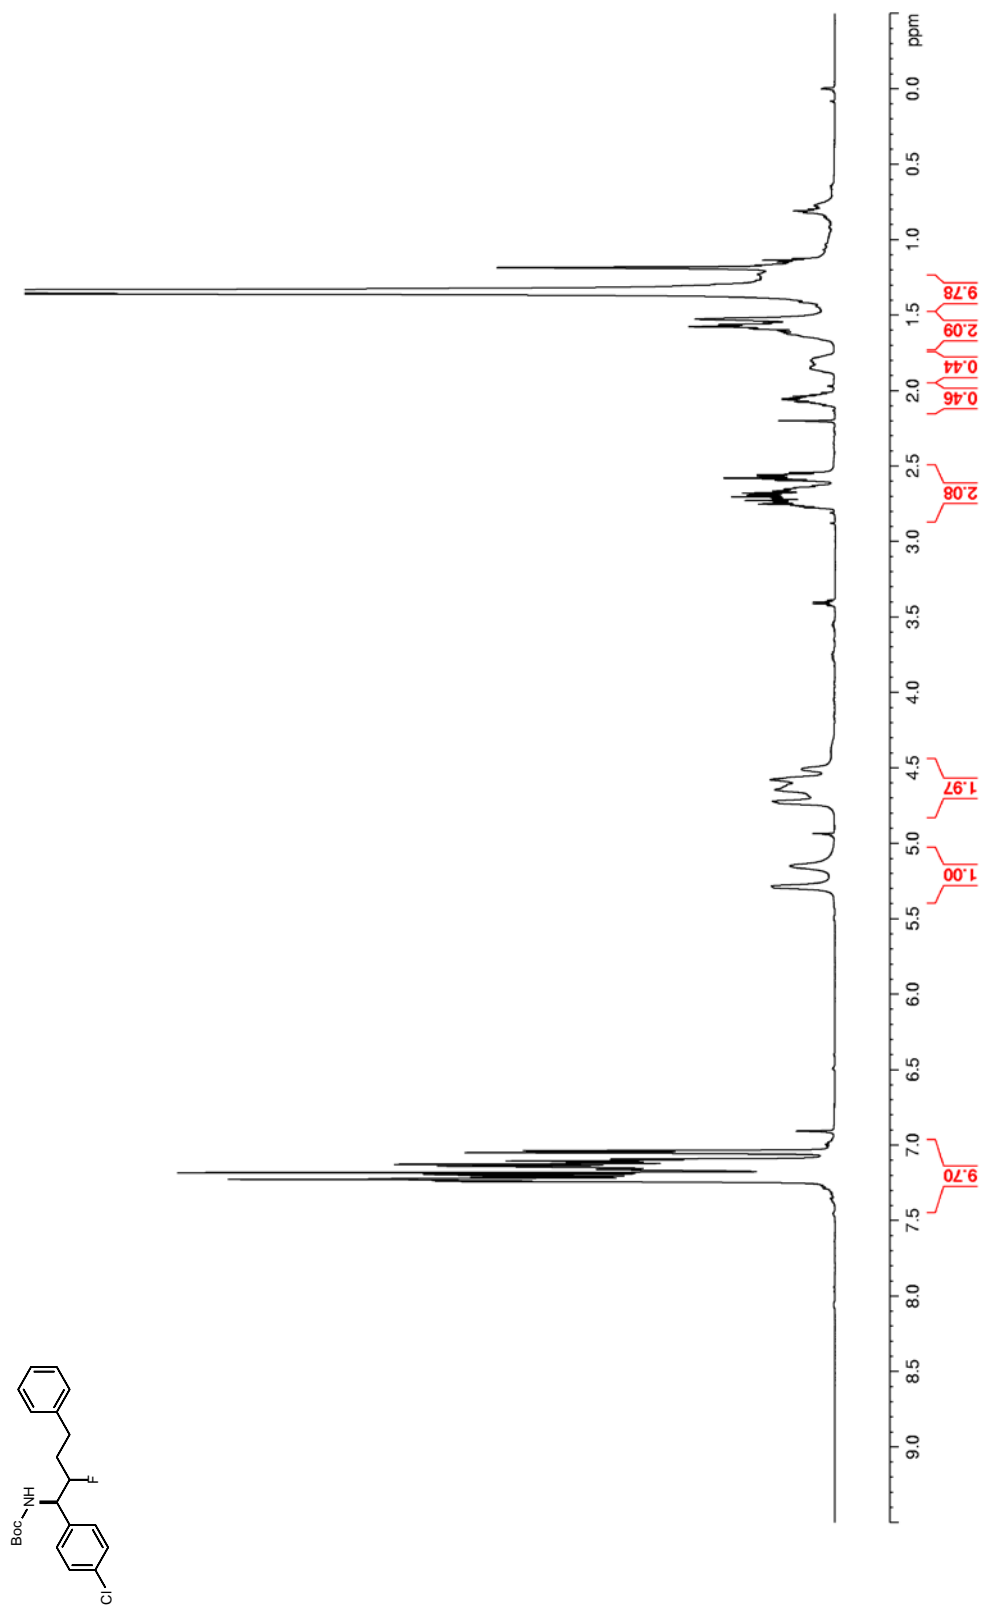

**Figure 36.**  $^{13}\text{C}$  NMR/DEPT135 (150 MHz,  $\text{CDCl}_3$ ) of **S1**

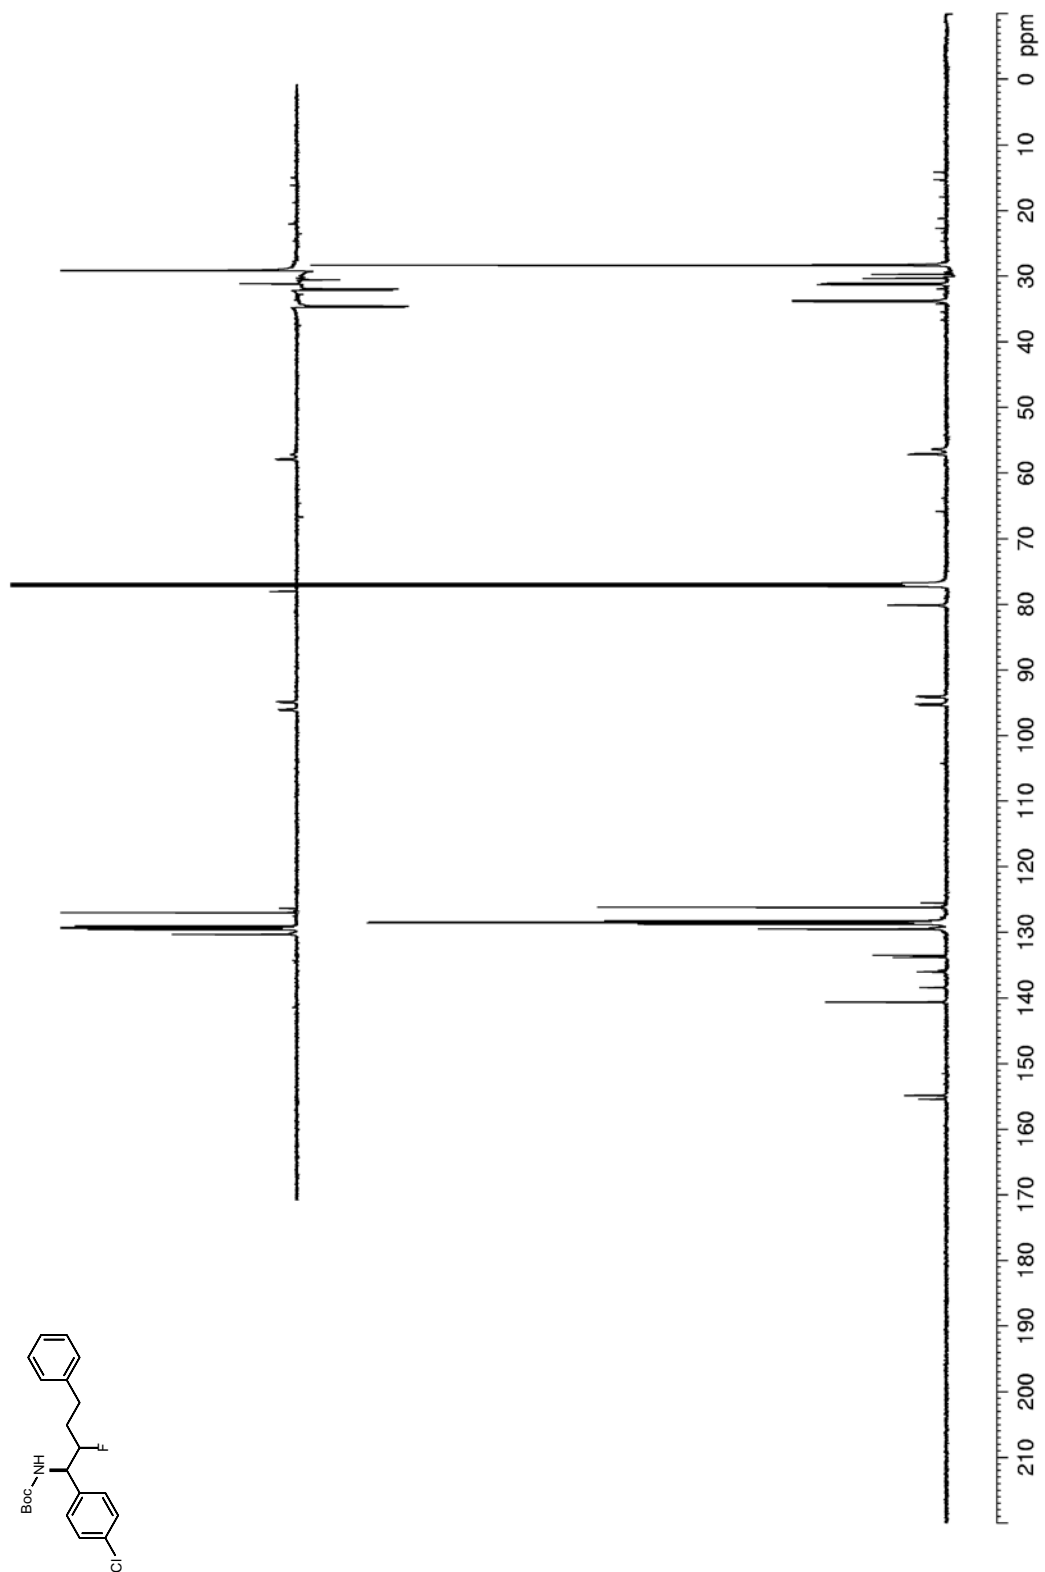

**Figure 37.**  $^1\text{H}$  NMR (400 MHz,  $\text{CDCl}_3$ ) of **S2**

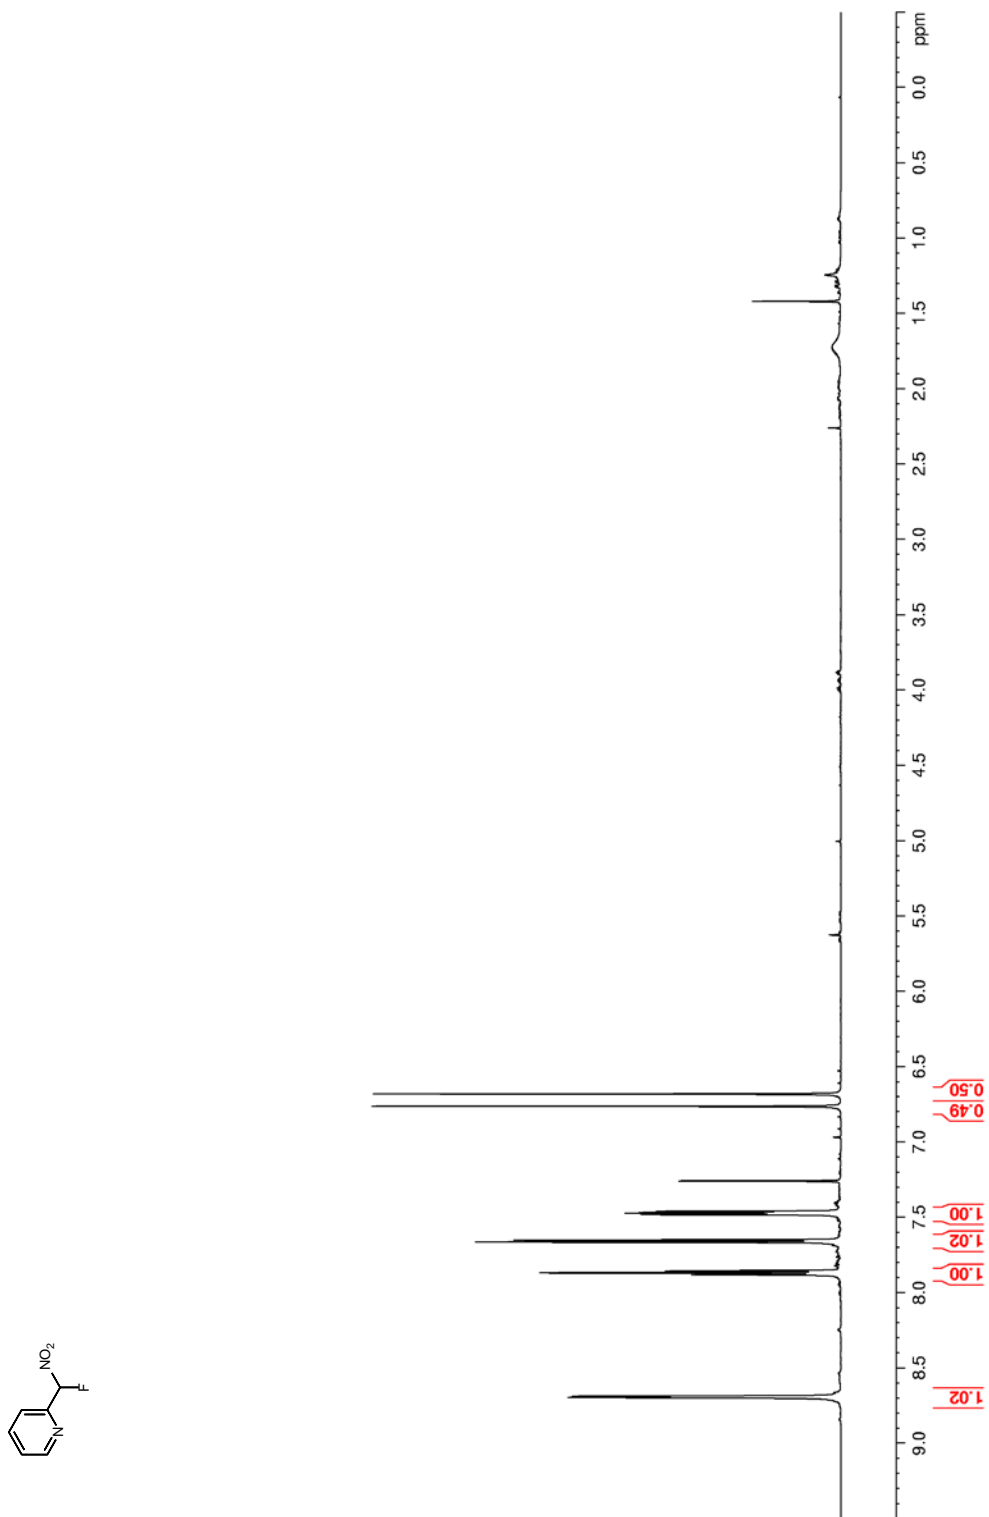

**Figure 38.**  $^{13}\text{C}$  NMR/DEPT135 (100 MHz,  $\text{CDCl}_3$ ) of **S2**

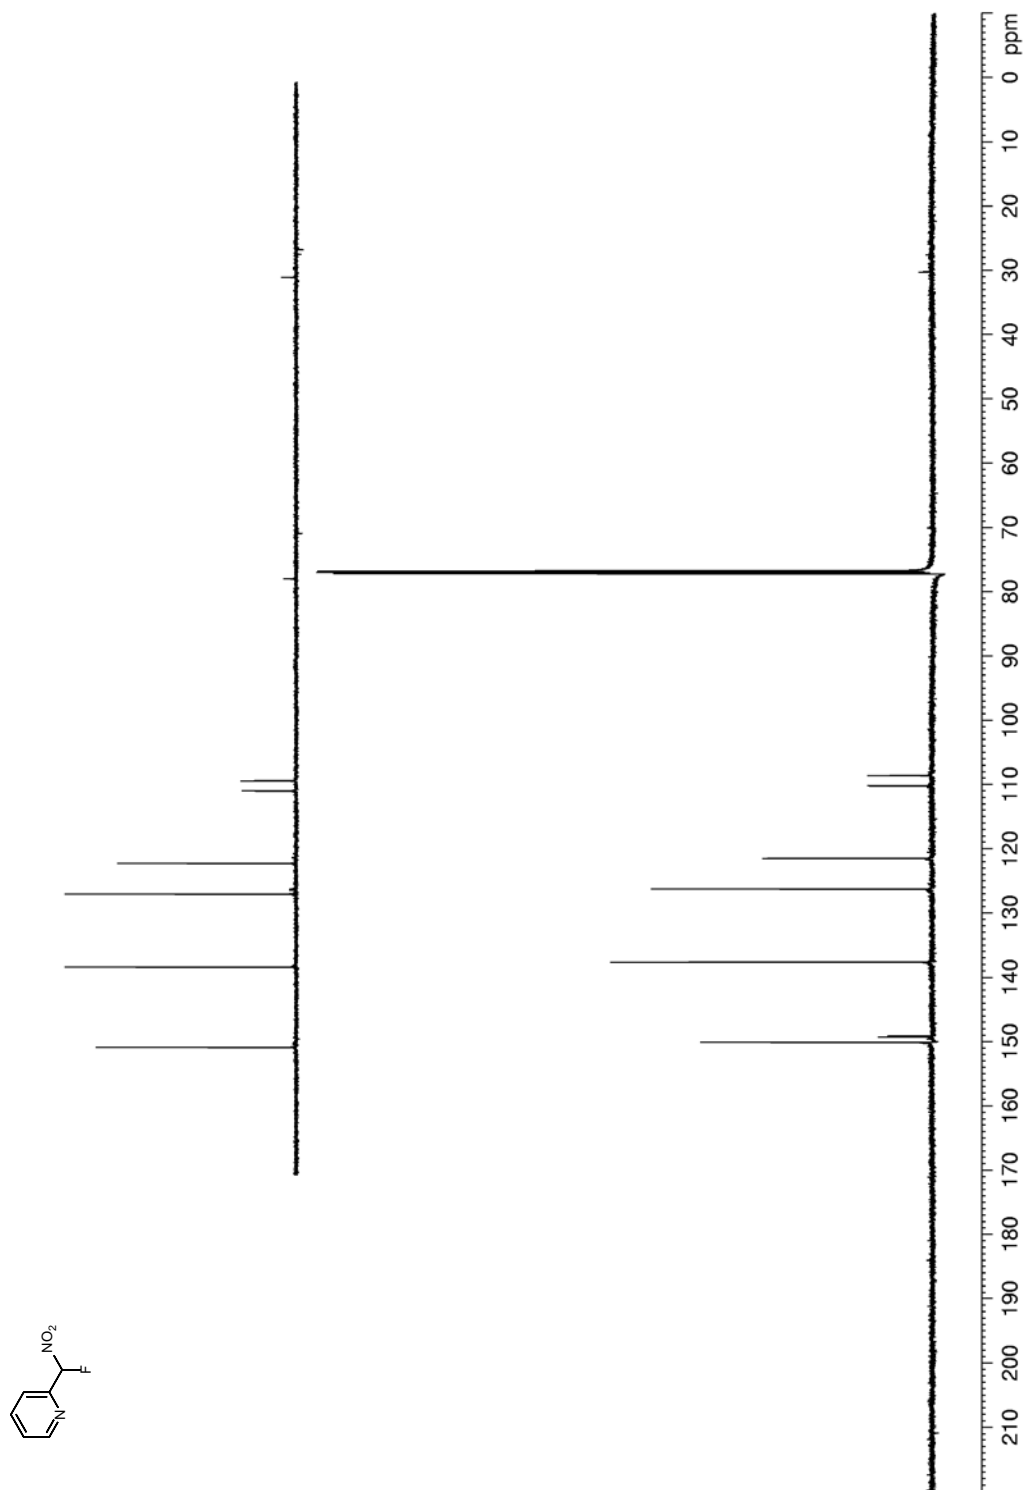



Figure 39.  $^1\text{H}$  NMR (400 MHz,  $\text{CDCl}_3$ ) of S3

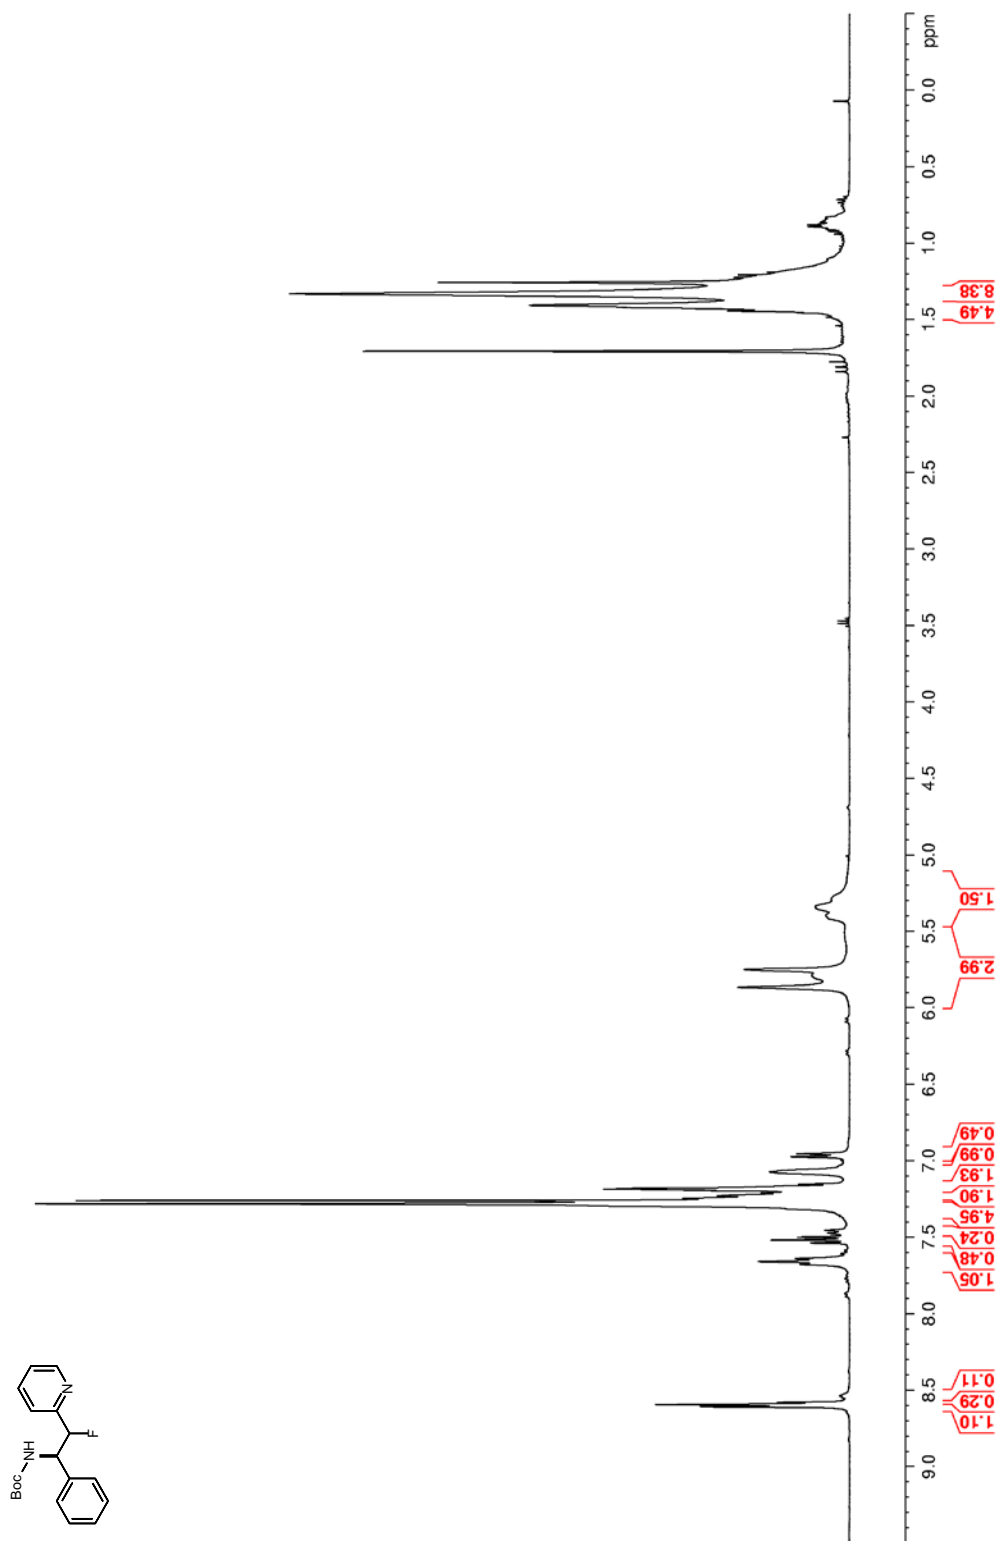

**Figure 40.**  $^{13}\text{C}$  NMR/DEPT135 (100 MHz,  $\text{CDCl}_3$ ) of **S3**

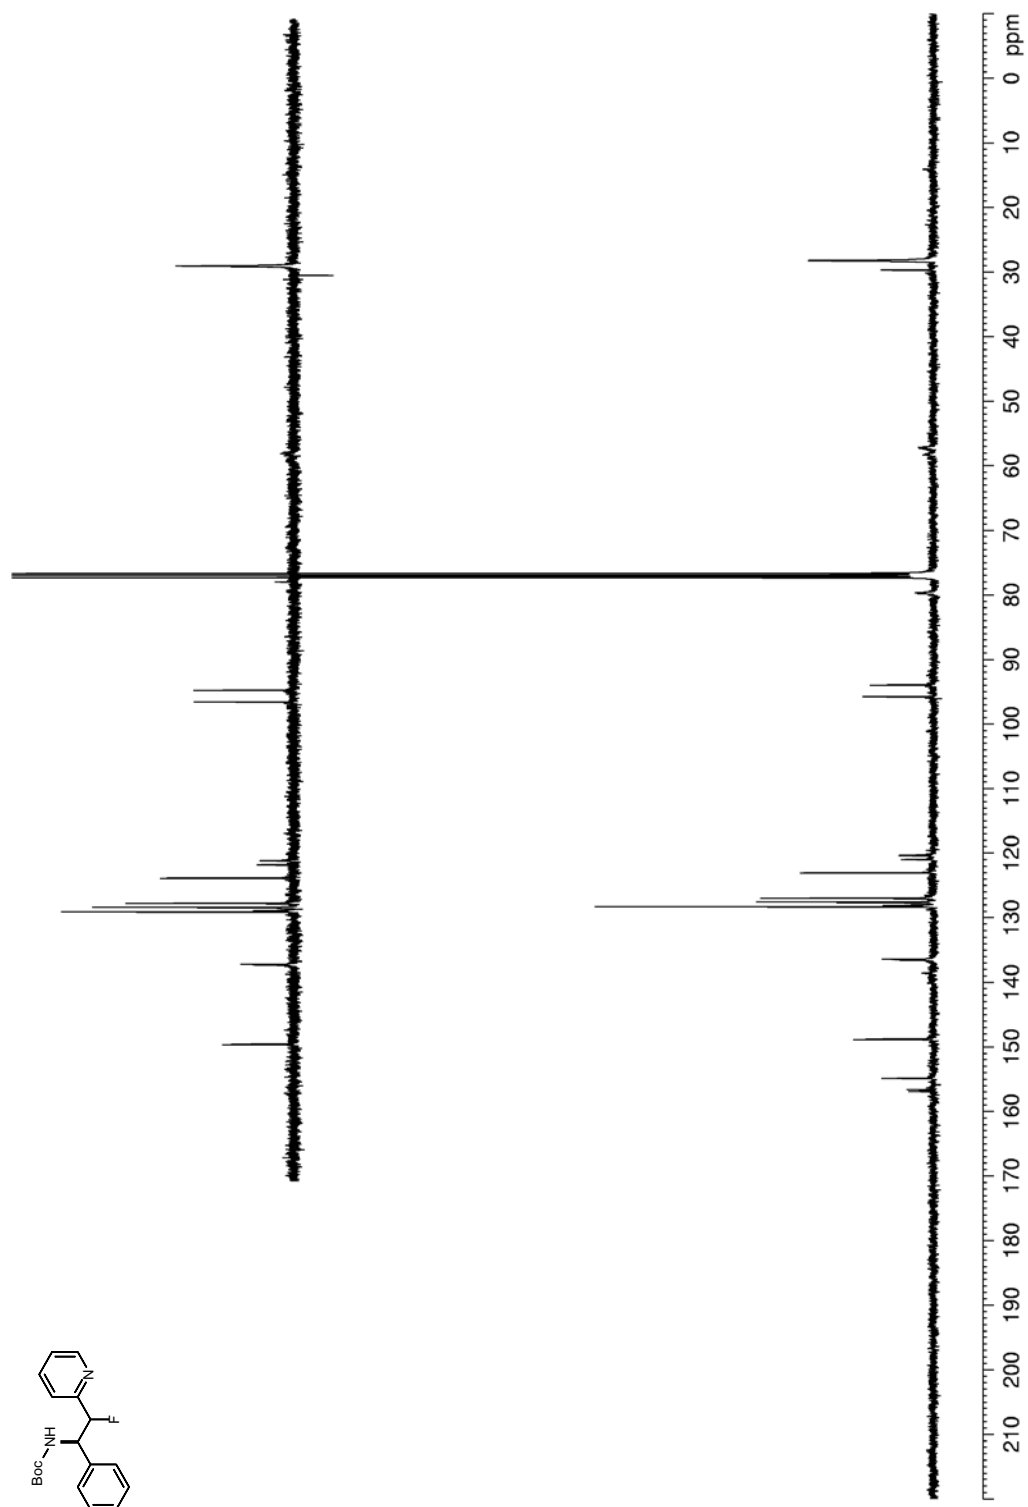

Figure 41.  $^1\text{H}$  NMR (400 MHz, MeOD) of S4

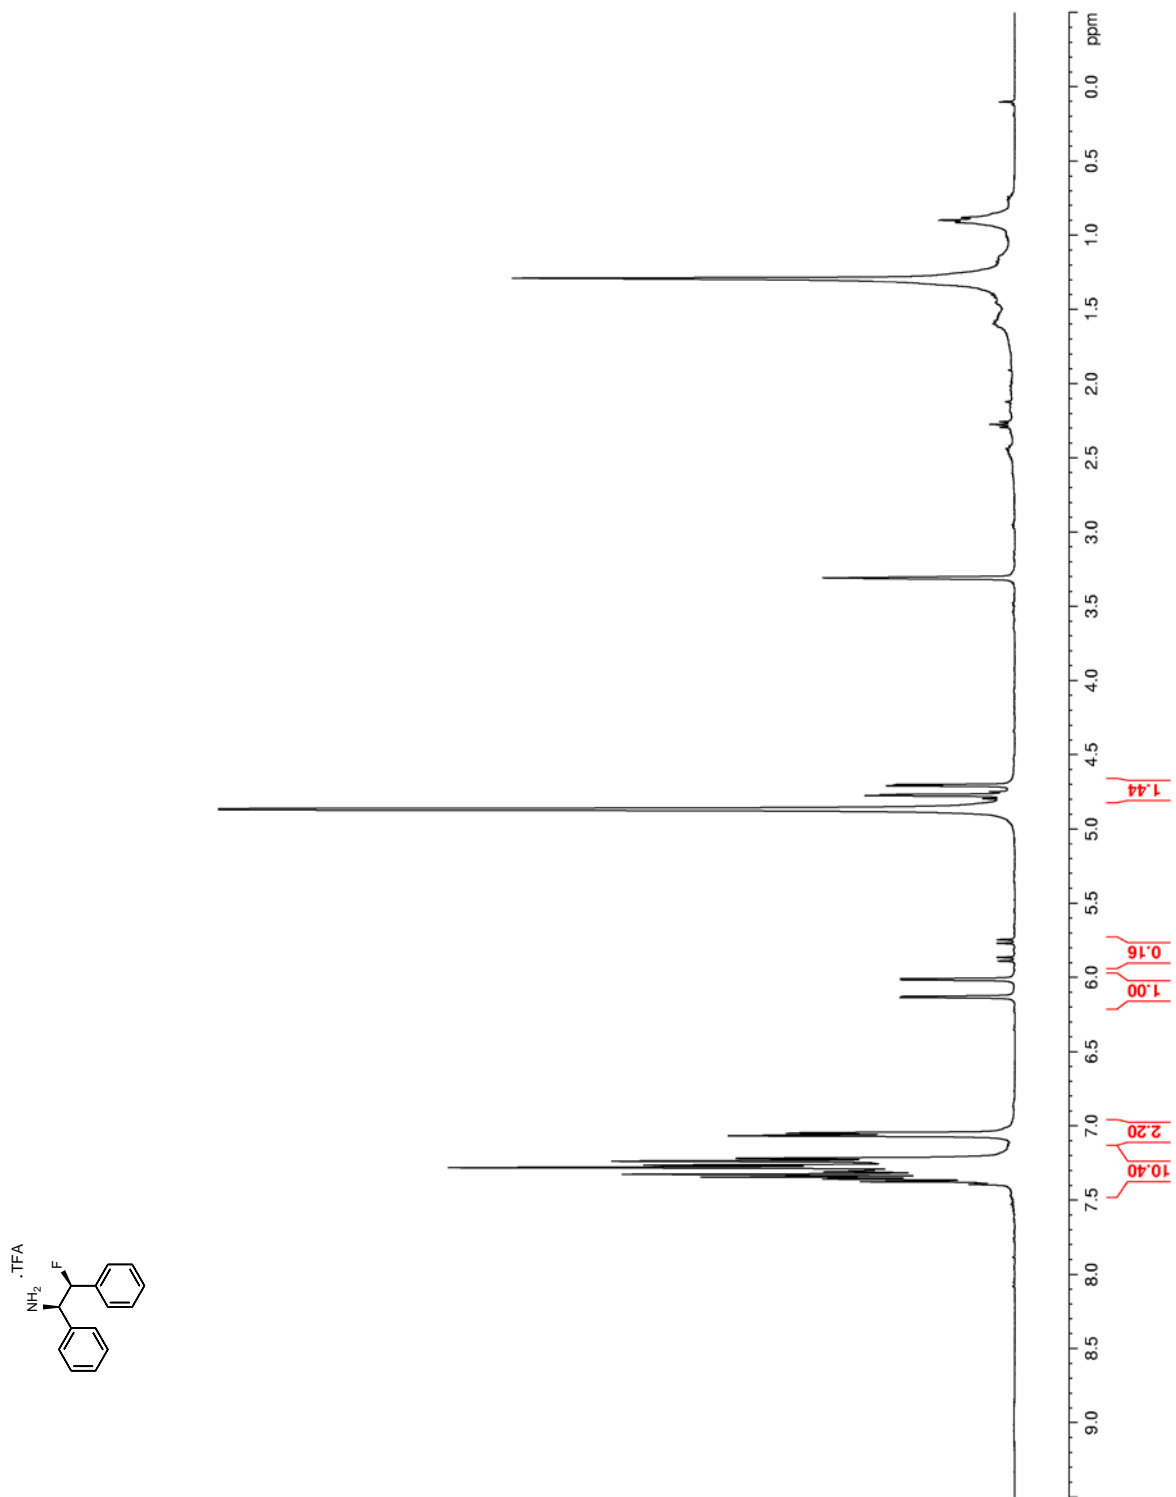

**Figure 42.**  $^{13}\text{C}$  NMR/DEPT135 (100 MHz, MeOD) of **S4**

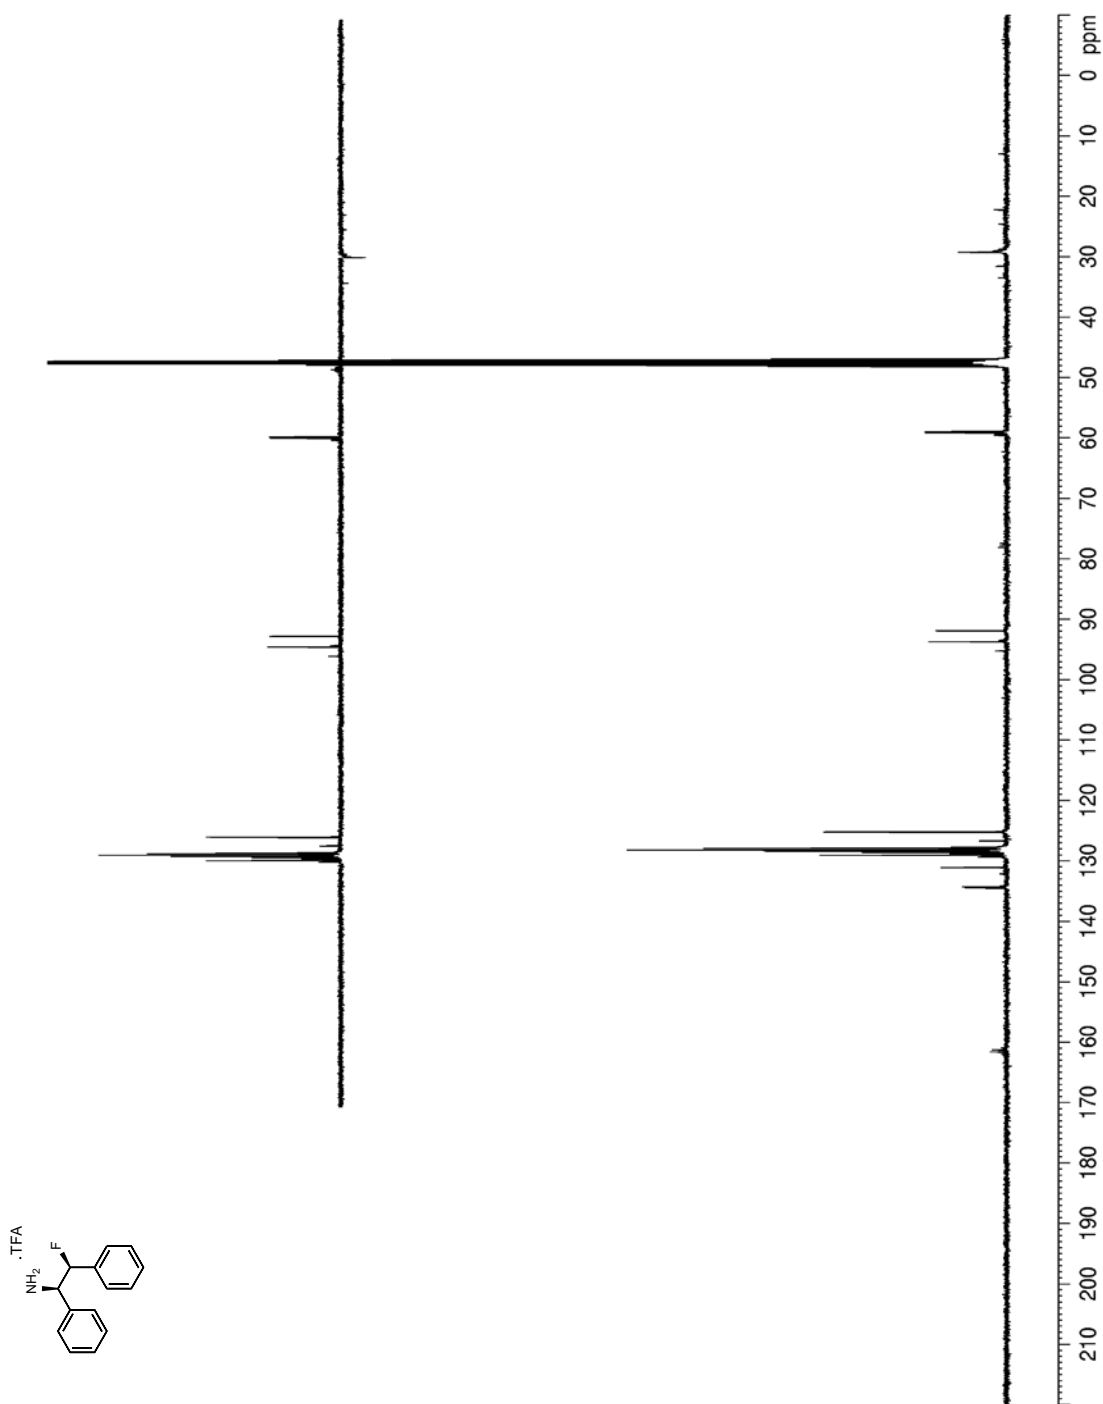

**Figure 43.** HPLC trace of **3**.

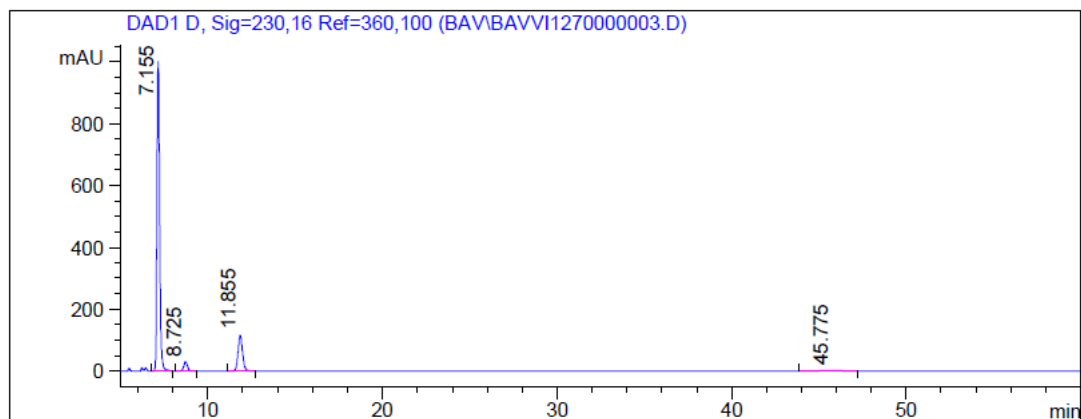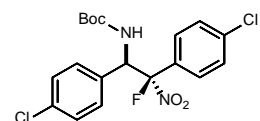

Signal 1: DAD1 D, Sig=230,16 Ref=360,100

| Peak # | RT [min] | Width [min] | Area      | Area % |
|--------|----------|-------------|-----------|--------|
| 1      | 7.155    | 0.176       | 10599.966 | 79.39  |
| 2      | 8.725    | 0.252       | 454.341   | 3.40   |
| 3      | 11.855   | 0.298       | 2085.416  | 15.62  |
| 4      | 45.775   | 1.615       | 212.238   | 1.59   |

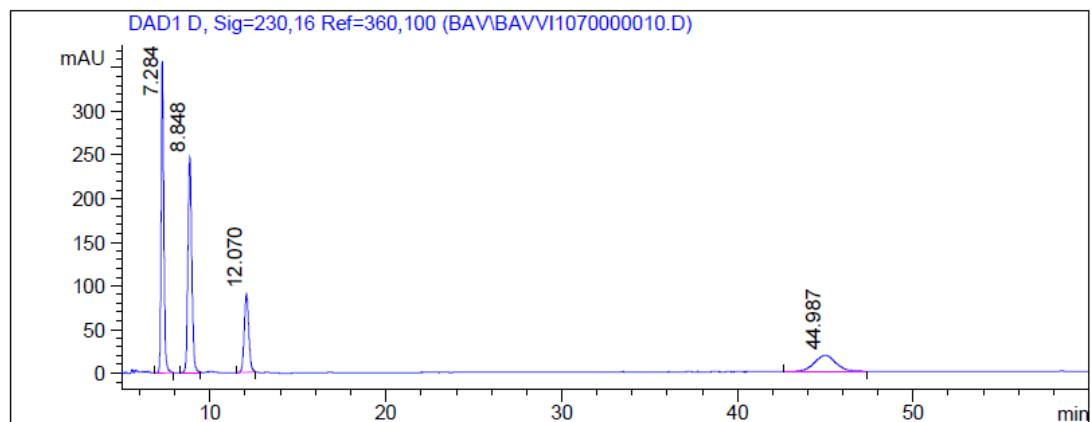

Signal 1: DAD1 D, Sig=230,16 Ref=360,100

| Peak # | RT [min] | Width [min] | Area     | Area % |
|--------|----------|-------------|----------|--------|
| 1      | 7.284    | 0.174       | 3740.637 | 34.65  |
| 2      | 8.848    | 0.255       | 3772.445 | 34.94  |
| 3      | 12.070   | 0.295       | 1607.546 | 14.89  |
| 4      | 44.987   | 1.487       | 1676.373 | 15.53  |

**Figure 44.** HPLC trace of **7a**.

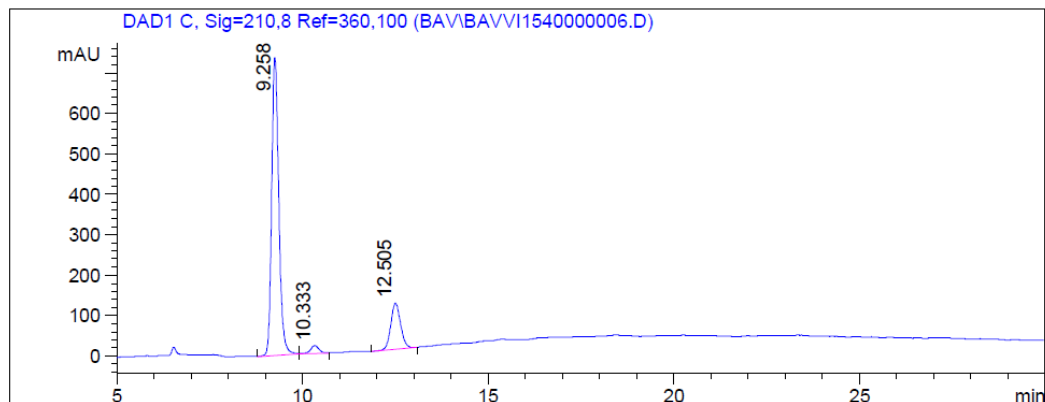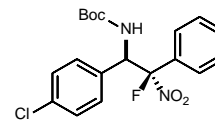

Signal 1: DAD1 C, Sig=210,8 Ref=360,100

| Peak # | RT [min] | Width [min] | Area     | Area % |
|--------|----------|-------------|----------|--------|
| 1      | 9.258    | 0.221       | 9778.399 | 80.29  |
| 2      | 10.333   | 0.259       | 297.102  | 2.44   |
| 3      | 12.505   | 0.307       | 2103.689 | 17.27  |

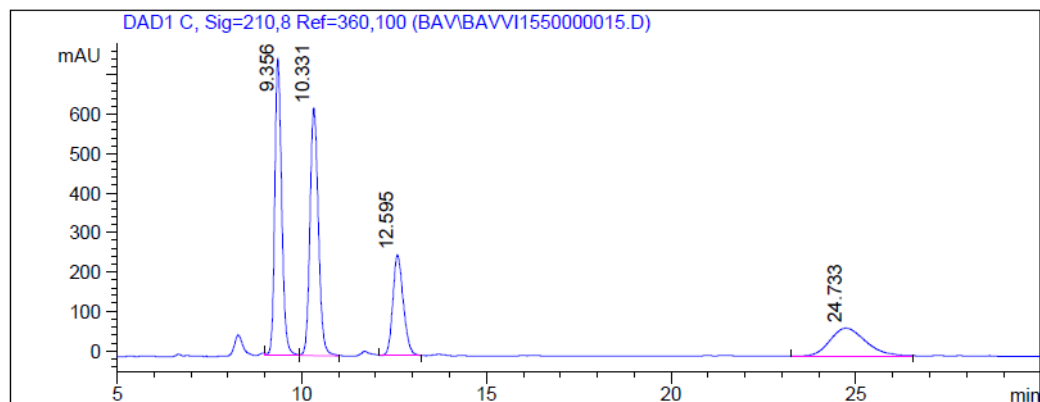

Signal 1: DAD1 C, Sig=210,8 Ref=360,100

| Peak # | RT [min] | Width [min] | Area     | Area % |
|--------|----------|-------------|----------|--------|
| 1      | 9.356    | 0.216       | 9783.243 | 33.19  |
| 2      | 10.331   | 0.264       | 9932.305 | 33.69  |
| 3      | 12.595   | 0.329       | 5031.937 | 17.07  |
| 4      | 24.733   | 1.110       | 4731.183 | 16.05  |

**Figure 45.** HPLC trace of **7b**.

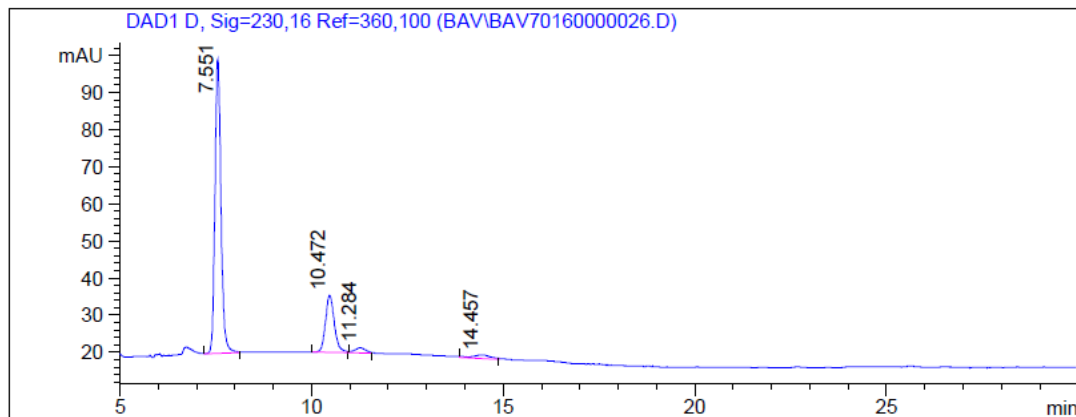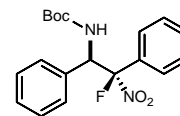

Signal 1: DAD1 D, Sig=230,16 Ref=360,100

| Peak # | RT [min] | Width [min] | Area    | Area % |
|--------|----------|-------------|---------|--------|
| 1      | 7.551    | 0.181       | 862.144 | 74.04  |
| 2      | 10.472   | 0.266       | 244.085 | 20.96  |
| 3      | 11.284   | 0.335       | 27.027  | 2.32   |
| 4      | 14.457   | 0.543       | 31.196  | 2.68   |

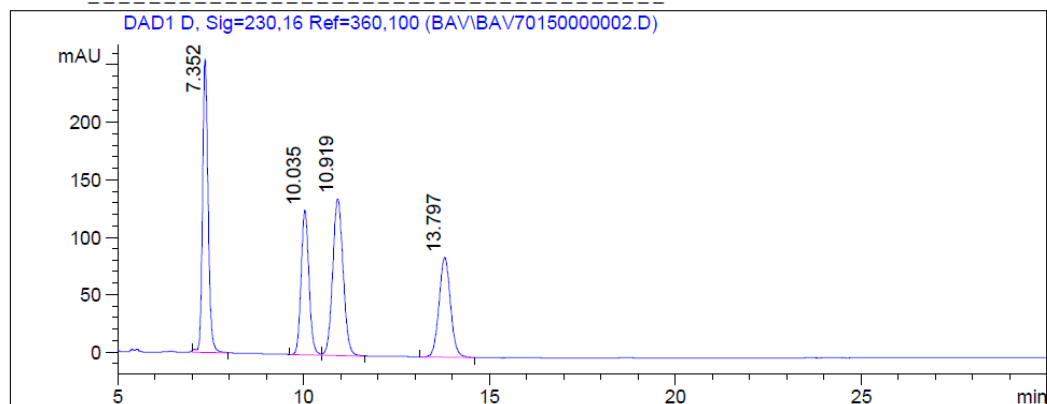

Signal 1: DAD1 D, Sig=230,16 Ref=360,100

| Peak # | RT [min] | Width [min] | Area     | Area % |
|--------|----------|-------------|----------|--------|
| 1      | 7.352    | 0.173       | 2654.923 | 29.36  |
| 2      | 10.035   | 0.245       | 1855.349 | 20.52  |
| 3      | 10.919   | 0.326       | 2666.948 | 29.49  |
| 4      | 13.797   | 0.358       | 1865.698 | 20.63  |

**Figure 46.** HPLC trace of **7c**.

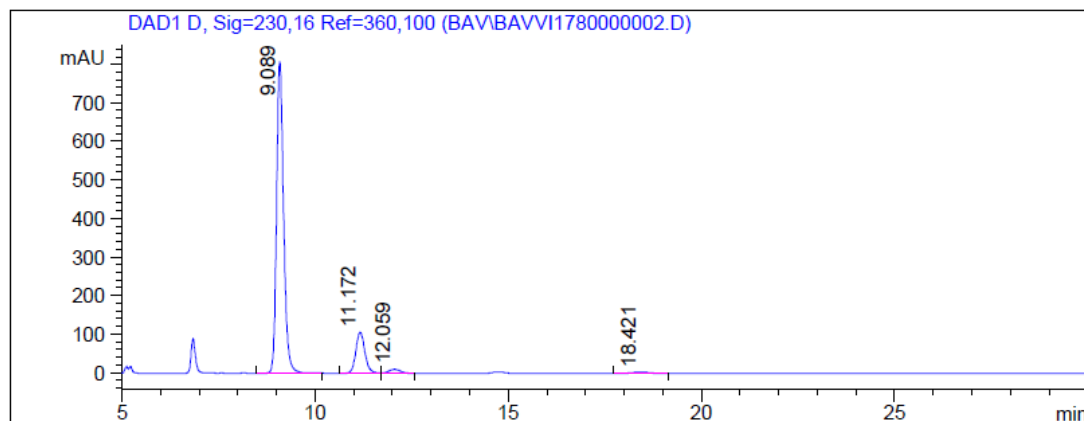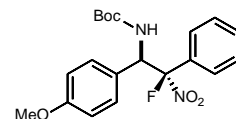

Signal 1: DAD1 D, Sig=230,16 Ref=360,100

| Peak # | RT [min] | Width [min] | Area      | Area % |
|--------|----------|-------------|-----------|--------|
| 1      | 9.089    | 0.210       | 10206.280 | 82.98  |
| 2      | 11.172   | 0.272       | 1750.505  | 14.23  |
| 3      | 12.059   | 0.347       | 219.357   | 1.78   |
| 4      | 18.421   | 0.544       | 123.147   | 1.00   |

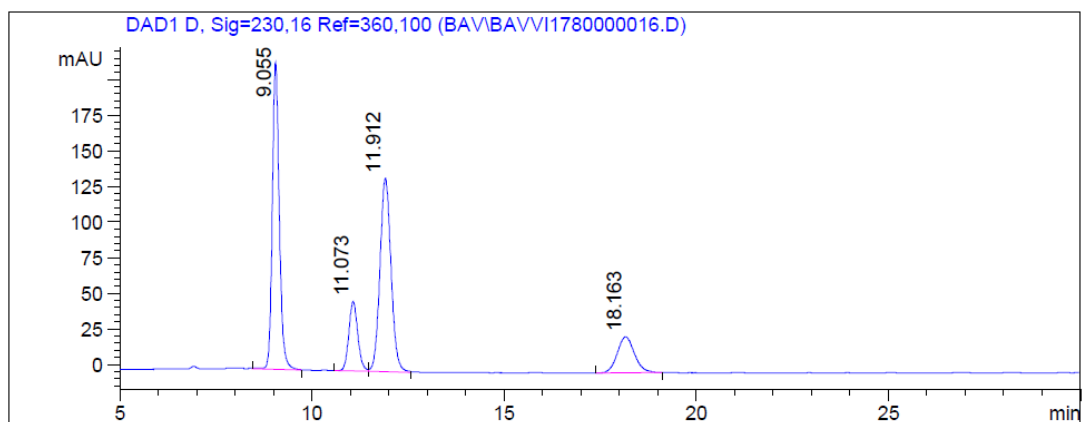

Signal 1: DAD1 D, Sig=230,16 Ref=360,100

| Peak # | RT [min] | Width [min] | Area     | Area % |
|--------|----------|-------------|----------|--------|
| 1      | 9.055    | 0.210       | 2722.281 | 38.80  |
| 2      | 11.073   | 0.269       | 785.431  | 11.19  |
| 3      | 11.912   | 0.334       | 2723.632 | 38.82  |
| 4      | 18.163   | 0.520       | 784.835  | 11.19  |



**Figure 47. HPLC trace of 7d.**

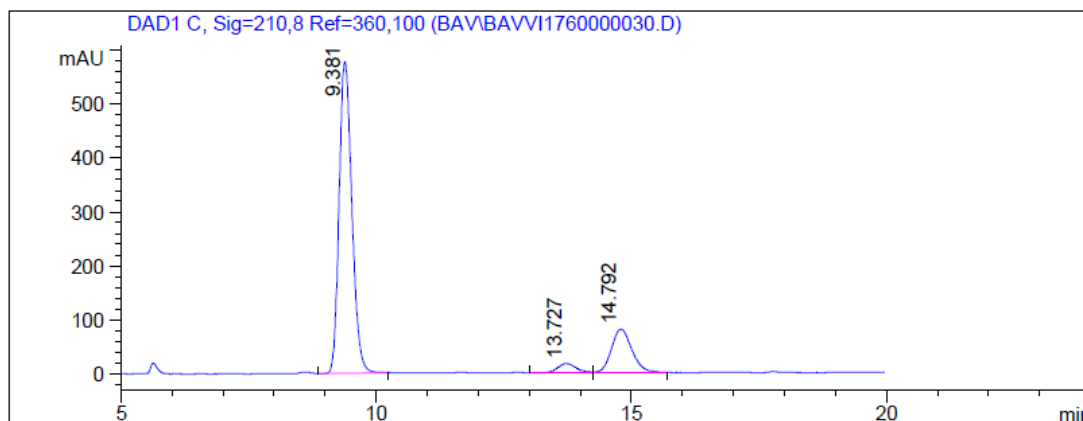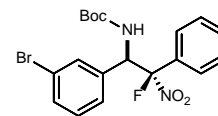

Signal 1: DAD1 C, Sig=210,8 Ref=360,100

| Peak # | RT [min] | Width [min] | Area      | Area % |
|--------|----------|-------------|-----------|--------|
| 1      | 9.381    | 0.290       | 10049.248 | 79.12  |
| 2      | 13.727   | 0.419       | 415.758   | 3.27   |
| 3      | 14.792   | 0.462       | 2236.555  | 17.61  |

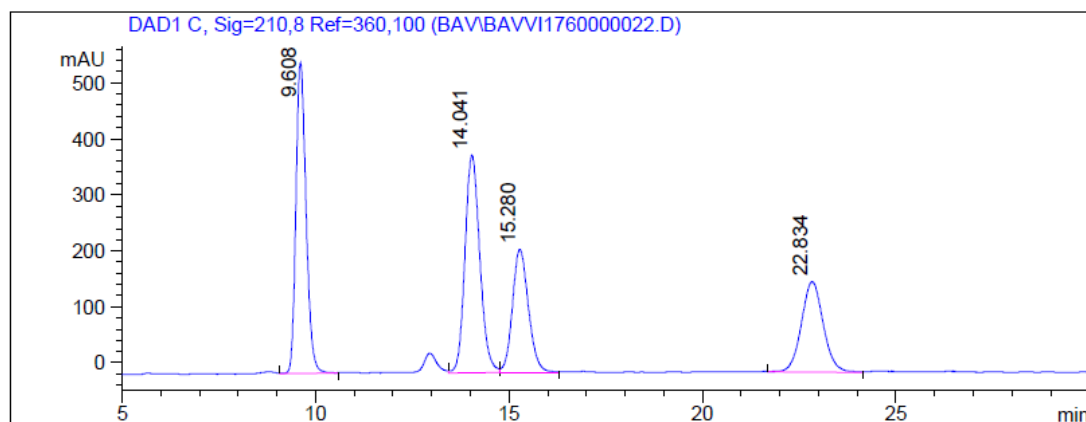

Signal 1: DAD1 C, Sig=210,8 Ref=360,100

| Peak # | RT [min] | Width [min] | Area      | Area % |
|--------|----------|-------------|-----------|--------|
| 1      | 9.608    | 0.304       | 10116.866 | 30.50  |
| 2      | 14.041   | 0.445       | 10369.546 | 31.27  |
| 3      | 15.280   | 0.479       | 6310.808  | 19.03  |
| 4      | 22.834   | 0.656       | 6368.974  | 19.20  |

**Figure 48.** HPLC trace of **7e**.

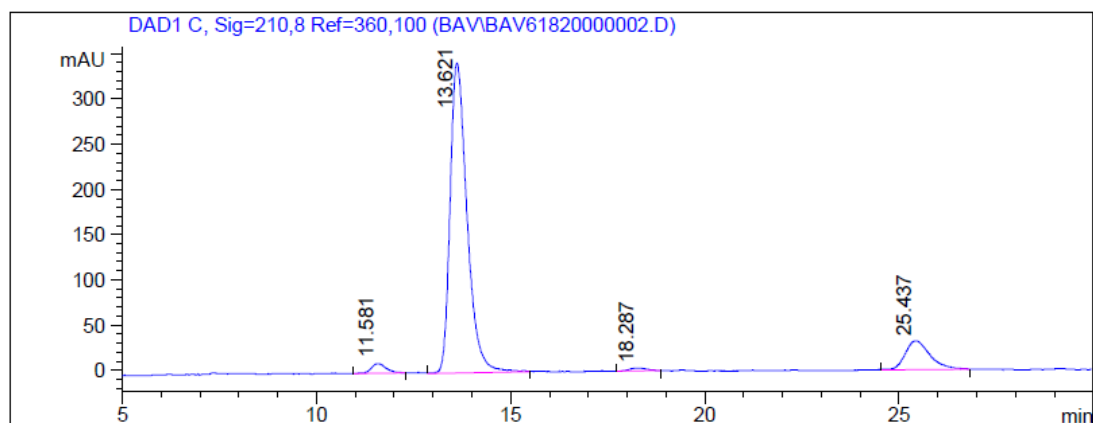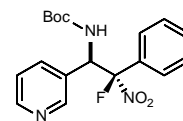

Signal 1: DAD1 C, Sig=210,8 Ref=360,100

| Peak # | RT [min] | Width [min] | Area      | Area % |
|--------|----------|-------------|-----------|--------|
| 1      | 11.581   | 0.447       | 293.182   | 2.40   |
| 2      | 13.621   | 0.506       | 10395.784 | 85.16  |
| 3      | 18.287   | 0.532       | 114.923   | 0.94   |
| 4      | 25.437   | 0.735       | 1404.119  | 11.50  |

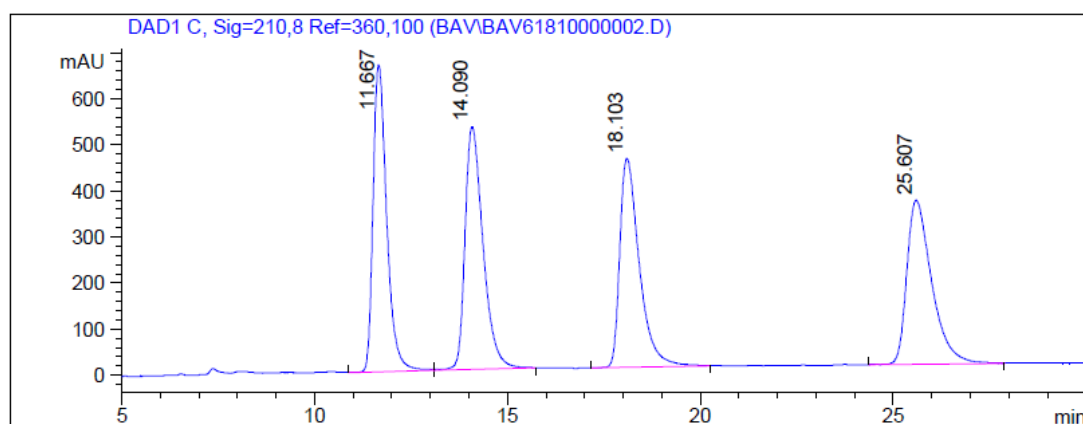

Signal 1: DAD1 C, Sig=210,8 Ref=360,100

| Peak # | RT [min] | Width [min] | Area      | Area % |
|--------|----------|-------------|-----------|--------|
| 1      | 11.667   | 0.409       | 16332.238 | 24.76  |
| 2      | 14.090   | 0.541       | 17089.305 | 25.90  |
| 3      | 18.103   | 0.587       | 15963.237 | 24.20  |
| 4      | 25.607   | 0.751       | 16014.698 | 24.27  |
| 5      | 44.855   | 0.242       | 572.871   | 0.87   |

**Figure 49.** HPLC trace of **7f** + *ent*-**7f**.

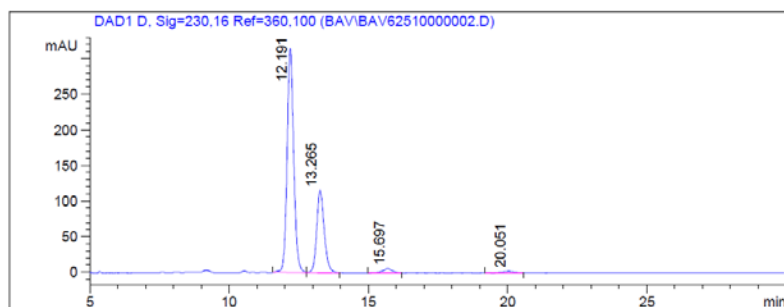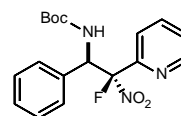

Signal 1: DAD1 D, Sig=230,16 Ref=360,100

| Peak # | RT [min] | Width [min] | Area     | Area % |
|--------|----------|-------------|----------|--------|
| 1      | 12.191   | 0.274       | 5165.790 | 68.55  |
| 2      | 13.265   | 0.312       | 2151.945 | 28.56  |
| 3      | 15.697   | 0.442       | 146.380  | 1.94   |
| 4      | 20.051   | 0.576       | 71.575   | 0.95   |

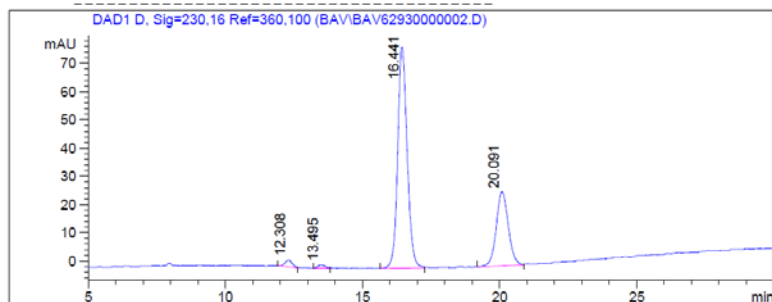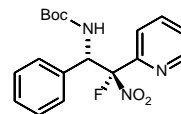

Signal 1: DAD1 D, Sig=230,16 Ref=360,100

| Peak # | RT [min] | Width [min] | Area     | Area % |
|--------|----------|-------------|----------|--------|
| 1      | 12.308   | 0.298       | 42.326   | 1.54   |
| 2      | 13.495   | 0.328       | 25.096   | 0.91   |
| 3      | 16.441   | 0.399       | 1879.701 | 68.39  |
| 4      | 20.091   | 0.509       | 801.416  | 29.16  |

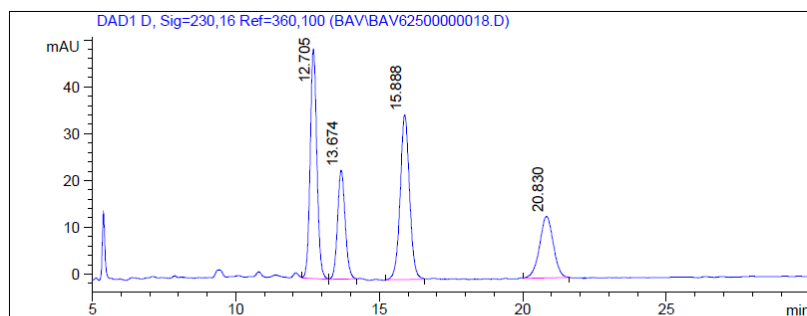

Signal 1: DAD1 D, Sig=230,16 Ref=360,100

| Peak # | RT [min] | Width [min] | Area    | Area % |
|--------|----------|-------------|---------|--------|
| 1      | 12.705   | 0.269       | 790.160 | 32.13  |
| 2      | 13.674   | 0.308       | 430.599 | 17.51  |
| 3      | 15.888   | 0.379       | 799.429 | 32.51  |
| 4      | 20.830   | 0.555       | 439.100 | 17.85  |

**Figure 50.** HPLC trace of **7g**.

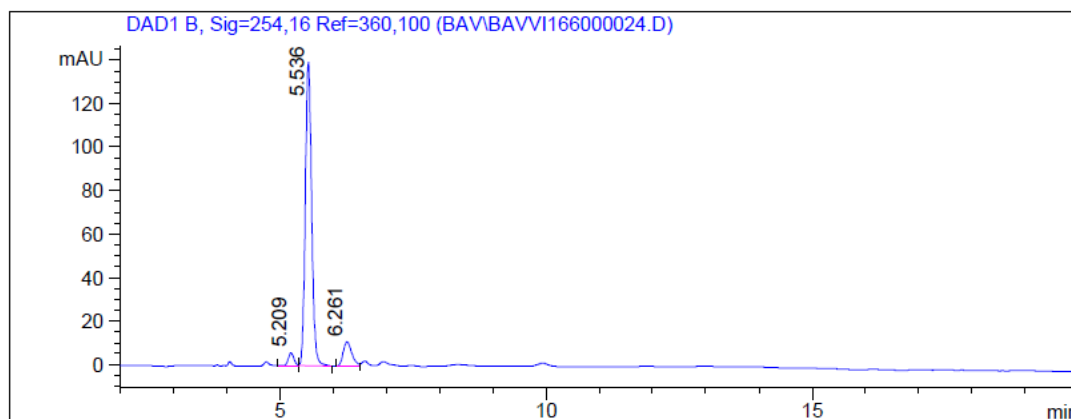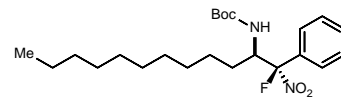

Signal 1: DAD1 B, Sig=254,16 Ref=360,100

| Peak # | RT [min] | Width [min] | Area     | Area % |
|--------|----------|-------------|----------|--------|
| 1      | 5.209    | 0.122       | 43.786   | 3.28   |
| 2      | 5.536    | 0.138       | 1157.429 | 86.69  |
| 3      | 6.261    | 0.195       | 133.858  | 10.03  |

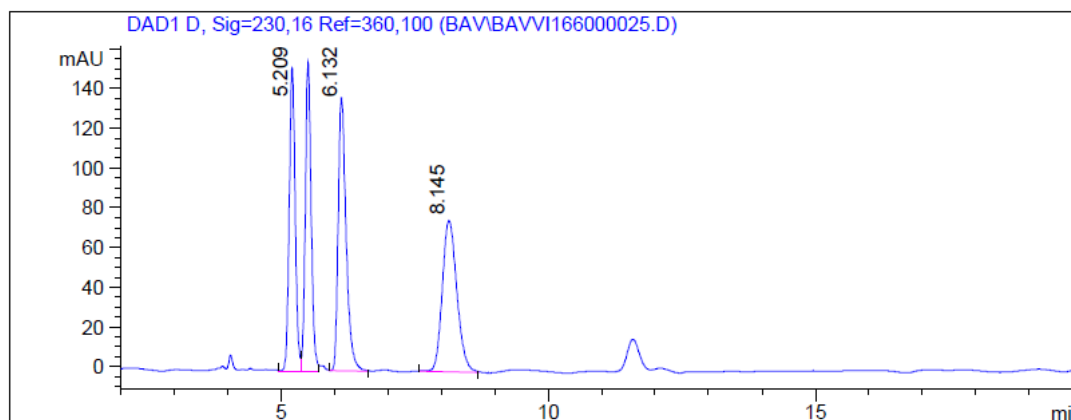

Signal 1: DAD1 D, Sig=230,16 Ref=360,100

| Peak # | RT [min] | Width [min] | Area     | Area % |
|--------|----------|-------------|----------|--------|
| 1      | 5.209    | 0.128       | 1174.427 | 22.45  |
| 2      | 5.508    | 0.127       | 1185.151 | 22.66  |
| 3      | 6.132    | 0.172       | 1421.073 | 27.17  |
| 4      | 8.145    | 0.317       | 1450.498 | 27.73  |

**Figure 51. HPLC trace of 7h.**

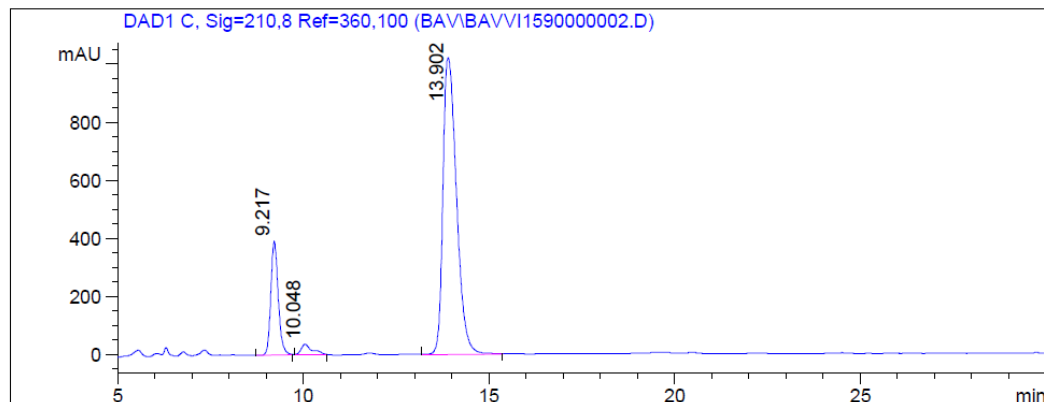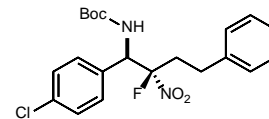

Signal 1: DAD1 C, Sig=210,8 Ref=360,100

| Peak # | RT [min] | Width [min] | Area      | Area % |
|--------|----------|-------------|-----------|--------|
| 1      | 9.217    | 0.231       | 5444.865  | 16.85  |
| 2      | 10.048   | 0.365       | 807.436   | 2.50   |
| 3      | 13.902   | 0.424       | 26055.645 | 80.65  |

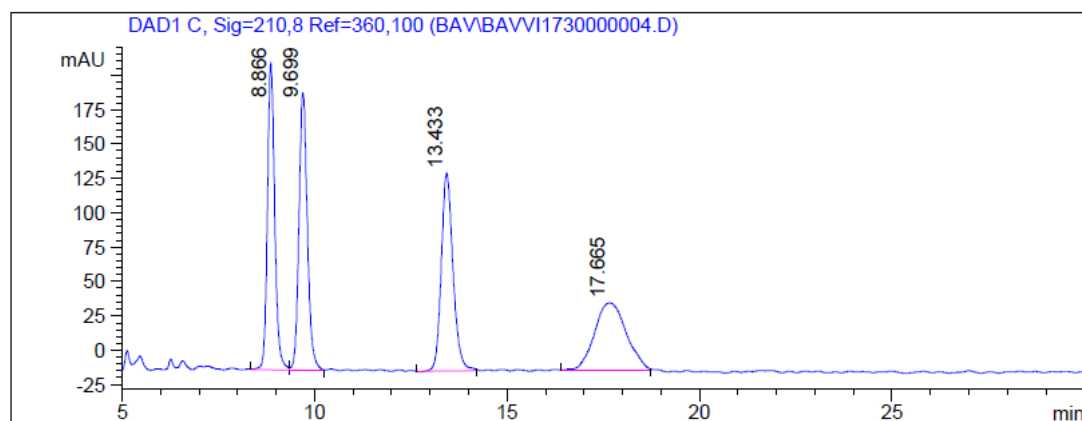

Signal 1: DAD1 C, Sig=210,8 Ref=360,100

| Peak # | RT [min] | Width [min] | Area     | Area % |
|--------|----------|-------------|----------|--------|
| 1      | 8.866    | 0.219       | 2924.311 | 24.68  |
| 2      | 9.699    | 0.253       | 3063.250 | 25.85  |
| 3      | 13.433   | 0.356       | 3067.807 | 25.89  |
| 4      | 17.665   | 0.952       | 2792.467 | 23.57  |

Figure 52. HPLC trace of 7i.

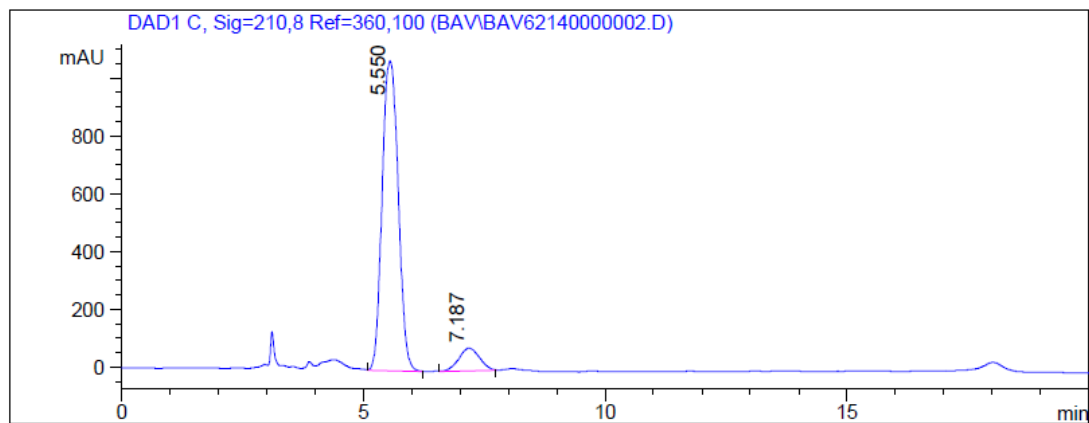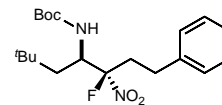

Signal 1: DAD1 C, Sig=210,8 Ref=360,100

| Peak # | RT [min] | Width [min] | Area      | Area % |
|--------|----------|-------------|-----------|--------|
| 1      | 5.550    | 0.385       | 24709.771 | 91.41  |
| 2      | 7.187    | 0.497       | 2322.444  | 8.59   |

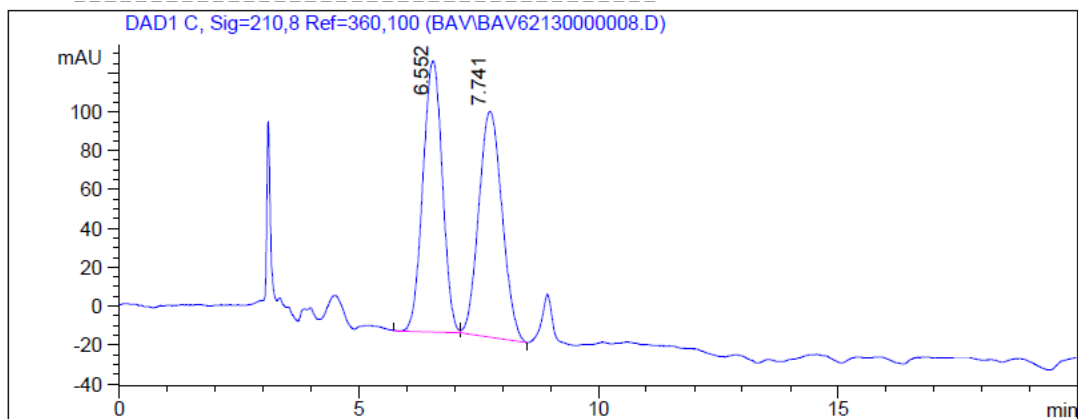

Signal 1: DAD1 C, Sig=210,8 Ref=360,100

| Peak # | RT [min] | Width [min] | Area     | Area % |
|--------|----------|-------------|----------|--------|
| 1      | 6.552    | 0.470       | 3938.330 | 49.98  |
| 2      | 7.741    | 0.565       | 3941.525 | 50.02  |

**Figure 53.** HPLC trace of **7j**.

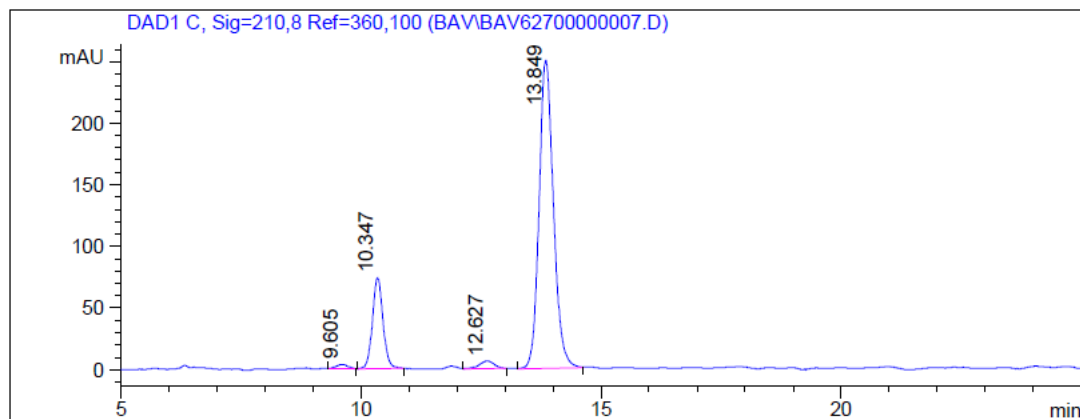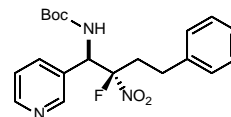

Signal 1: DAD1 C, Sig=210,8 Ref=360,100

| Peak # | RT [min] | Width [min] | Area     | Area % |
|--------|----------|-------------|----------|--------|
| 1      | 9.605    | 0.292       | 61.668   | 0.94   |
| 2      | 10.347   | 0.256       | 1132.465 | 17.35  |
| 3      | 12.627   | 0.362       | 133.279  | 2.04   |
| 4      | 13.849   | 0.346       | 5199.589 | 79.66  |

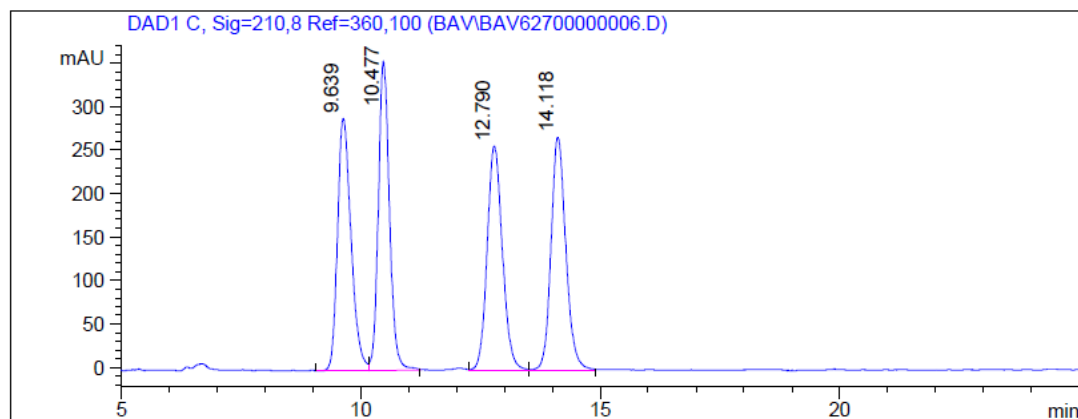

Signal 1: DAD1 C, Sig=210,8 Ref=360,100

| Peak # | RT [min] | Width [min] | Area     | Area % |
|--------|----------|-------------|----------|--------|
| 1      | 9.639    | 0.328       | 5701.634 | 24.93  |
| 2      | 10.477   | 0.269       | 5739.758 | 25.10  |
| 3      | 12.790   | 0.368       | 5685.617 | 24.86  |
| 4      | 14.118   | 0.358       | 5739.110 | 25.10  |

**Figure 54.** HPLC trace of **10**.

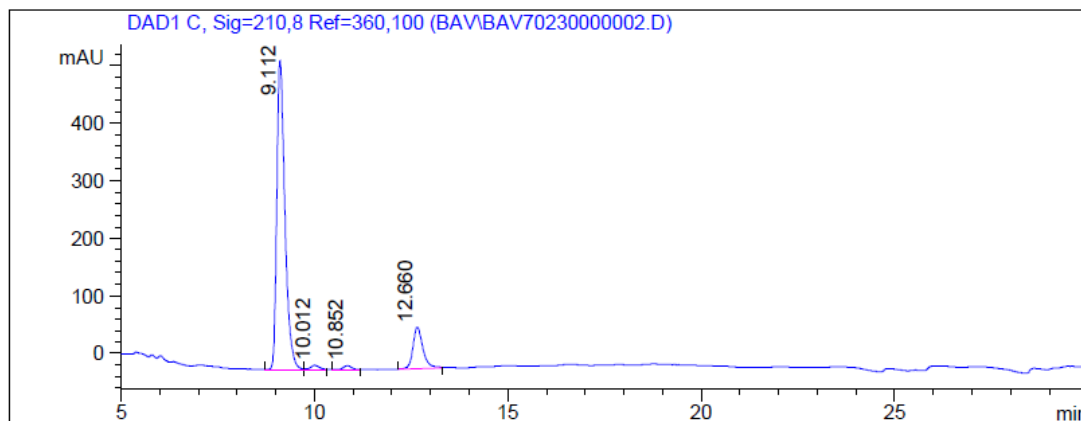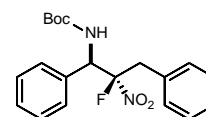

Signal 1: DAD1 C, Sig=210,8 Ref=360,100

| Peak # | RT [min] | Width [min] | Area     | Area % |
|--------|----------|-------------|----------|--------|
| 1      | 9.112    | 0.243       | 7845.124 | 83.38  |
| 2      | 10.012   | 0.287       | 144.605  | 1.54   |
| 3      | 10.852   | 0.281       | 118.508  | 1.26   |
| 4      | 12.660   | 0.301       | 1300.506 | 13.82  |

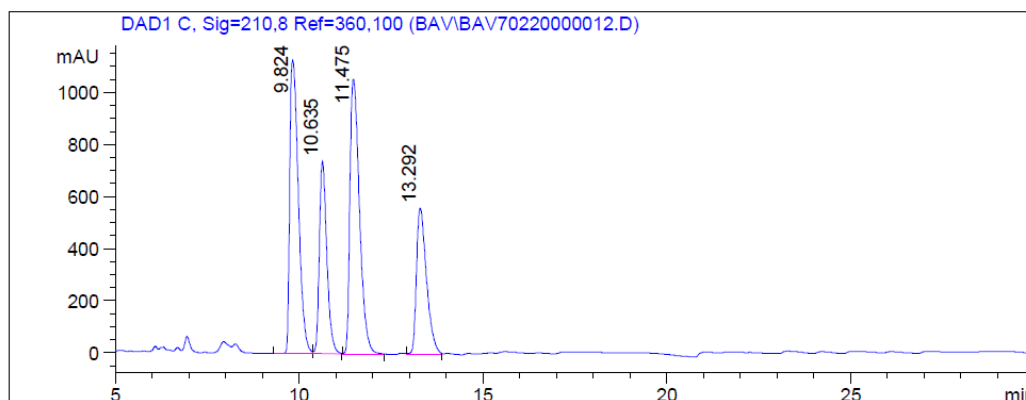

Signal 1: DAD1 C, Sig=210,8 Ref=360,100

| Peak # | RT [min] | Width [min] | Area      | Area % |
|--------|----------|-------------|-----------|--------|
| 1      | 9.824    | 0.271       | 18351.621 | 31.46  |
| 2      | 10.635   | 0.235       | 10425.837 | 17.88  |
| 3      | 11.475   | 0.300       | 18996.447 | 32.57  |
| 4      | 13.292   | 0.314       | 10550.926 | 18.09  |
